# Supplementary material
Source: publisher figshare collection journal article supplement (https://acs.figshare.com/ndownloader/files/13834631)
Supplement: Supplementary file 5 [file 13834631]

# ChemOracle<sup>®</sup> (/)

An integrated web-based platform for target prediction: your compounds our solutions!

[HOME \(/\)](#)      [PREDICTION \(/PREDICTION/\)](#)      [ABOUT US \(/ABOUT\\_US/\)](#)

Your molecule

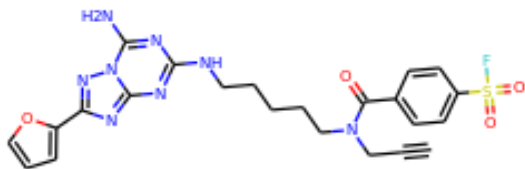

has 3 possible target(s) !

Adenosine A2a receptor: ki = N.A.00 nM Score = 4.6646

Best Fingerprints Similarity

ECFP2

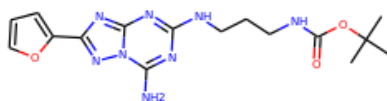

CHEMBL1927428

(<https://pubchem.ncbi.nlm.nih.gov/compound/CHEMBL1927428>)

ki = 38.6 nM

simil = 0.54

FCFP2

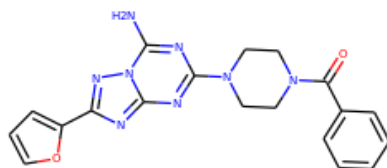

CHEMBL1927440

(<https://pubchem.ncbi.nlm.nih.gov/compound/CHEMBL1927440>)

ki = 348.0 nM

simil = 0.666666666667

DAY



CHEMBL1927440

(<https://pubchem.ncbi.nlm.nih.gov/compound/CHEMBL1927440>)

ki = 348.0 nM

simil = 0.783945345858

PAT

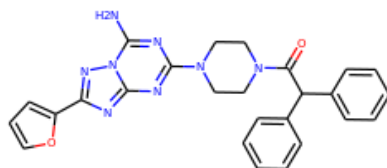

CHEMBL1927447

(<https://pubchem.ncbi.nlm.nih.gov/compound/CHEMBL1927447>)

ki = 92.9 nM

simil = 0.86308492201

## Latest News

Website alpha-v  
Launched  
*October 10th, 201*

Work in progress.

|       |                                                                                     |                                                                                                                                                                                                                                       |
|-------|-------------------------------------------------------------------------------------|---------------------------------------------------------------------------------------------------------------------------------------------------------------------------------------------------------------------------------------|
| PAIR  | 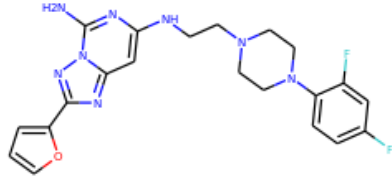   | <p><u>CHEMBL361687</u><br/> <a href="https://pubchem.ncbi.nlm.nih.gov/compound/CHEMBL361687">. (https://pubchem.ncbi.nlm.nih.gov/compound/CHEMBL361687)</a><br/>           ki = 1.5 nM<br/>           simil = 0.420454545455</p>      |
| TORS  |    | <p><u>CHEMBL1927440</u><br/> <a href="https://pubchem.ncbi.nlm.nih.gov/compound/CHEMBL1927440">. (https://pubchem.ncbi.nlm.nih.gov/compound/CHEMBL1927440)</a><br/>           ki = 348.0 nM<br/>           simil = 0.613636363636</p> |
| FP2   |   | <p><u>CHEMBL1927440</u><br/> <a href="https://pubchem.ncbi.nlm.nih.gov/compound/CHEMBL1927440">. (https://pubchem.ncbi.nlm.nih.gov/compound/CHEMBL1927440)</a><br/>           ki = 348.0 nM<br/>           simil = 0.71186440678</p>  |
| PUB   |  | <p><u>CHEMBL1927440</u><br/> <a href="https://pubchem.ncbi.nlm.nih.gov/compound/CHEMBL1927440">. (https://pubchem.ncbi.nlm.nih.gov/compound/CHEMBL1927440)</a><br/>           ki = 348.0 nM<br/>           simil = 0.876777251185</p> |
| MACCS |  | <p><u>CHEMBL22717</u><br/> <a href="https://pubchem.ncbi.nlm.nih.gov/compound/CHEMBL22717">. (https://pubchem.ncbi.nlm.nih.gov/compound/CHEMBL22717)</a><br/>           ki = 0.12 nM<br/>           simil = 0.802197802198</p>        |
| KR    |  | <p><u>CHEMBL3260729</u><br/> <a href="https://pubchem.ncbi.nlm.nih.gov/compound/CHEMBL3260729">. (https://pubchem.ncbi.nlm.nih.gov/compound/CHEMBL3260729)</a><br/>           ki = 12.0 nM<br/>           simil = 0.536585365854</p>  |
| GRAPH |  | <p><u>CHEMBL1927444</u><br/> <a href="https://pubchem.ncbi.nlm.nih.gov/compound/CHEMBL1927444">. (https://pubchem.ncbi.nlm.nih.gov/compound/CHEMBL1927444)</a><br/>           ki = 16.9 nM<br/>           simil = 0.760233918129</p>  |
| SUB   |                                                                                     | <p><u>CHEMBL109499</u><br/> <a href="https://pubchem.ncbi.nlm.nih.gov/compound/CHEMBL109499">. (https://pubchem.ncbi.nlm.nih.gov/compound/CHEMBL109499)</a><br/>           ki = 11.0 nM<br/>           simil = 0.809523809524</p>     |

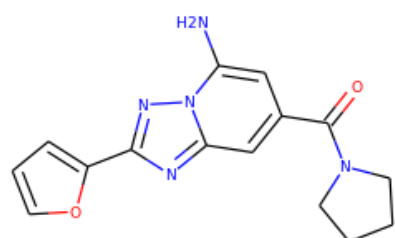

HYB

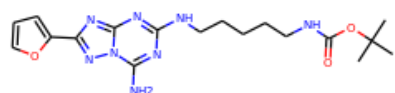

CHEMBL1927429  
(<https://pubchem.ncbi.nlm.nih.gov/compound/CHEMBL1927429>)  
ki = 44.7 nM  
simil = 0.815384615385

Adenosine A1 receptor: ki = 2358.7828 nM Score = 3.1608

Best Fingerprints Similarity

ECFP2

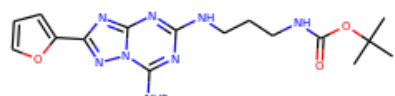

CHEMBL1927428  
(<https://pubchem.ncbi.nlm.nih.gov/compound/CHEMBL1927428>)  
ki = 344.0 nM  
simil = 0.54

FCFP2

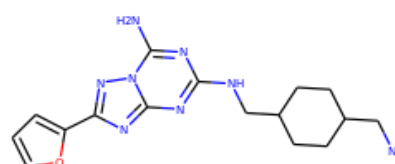

CHEMBL1927444  
(<https://pubchem.ncbi.nlm.nih.gov/compound/CHEMBL1927444>)  
ki = 1350.0 nM  
simil = 0.655172413793

DAY

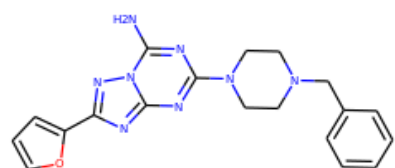

CHEMBL188897  
(<https://pubchem.ncbi.nlm.nih.gov/compound/CHEMBL188897>)  
ki = 978.0 nM  
simil = 0.74632034632

PAT

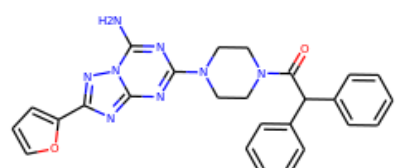

CHEMBL1927447  
(<https://pubchem.ncbi.nlm.nih.gov/compound/CHEMBL1927447>)  
ki = 7470.0 nM  
simil = 0.86308492201

PAIR

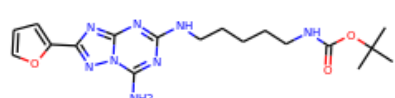

CHEMBL1927429  
(<https://pubchem.ncbi.nlm.nih.gov/compound/CHEMBL1927429>)  
ki = 963.0 nM  
simil = 0.334831460674

|       |                                                                                     |                                                                                                                                                                                                       |
|-------|-------------------------------------------------------------------------------------|-------------------------------------------------------------------------------------------------------------------------------------------------------------------------------------------------------|
| TORS  | 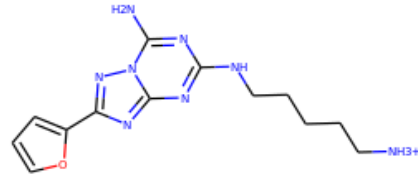   | <u>CHEMBL1927446</u><br><a href="https://pubchem.ncbi.nlm.nih.gov/compound/CHEMBL1927446">. (https://pubchem.ncbi.nlm.nih.gov/compound/CHEMBL1927446)</a><br>ki = 2950.0 nM<br>simil = 0.609756097561 |
| FP2   |    | <u>CHEMBL1927634</u><br><a href="https://pubchem.ncbi.nlm.nih.gov/compound/CHEMBL1927634">. (https://pubchem.ncbi.nlm.nih.gov/compound/CHEMBL1927634)</a><br>ki = 1800.0 nM<br>simil = 0.698863636364 |
| PUB   |    | <u>CHEMBL1927436</u><br><a href="https://pubchem.ncbi.nlm.nih.gov/compound/CHEMBL1927436">. (https://pubchem.ncbi.nlm.nih.gov/compound/CHEMBL1927436)</a><br>ki = 3510.0 nM<br>simil = 0.872641509434 |
| MACCS |  | <u>CHEMBL22717</u><br><a href="https://pubchem.ncbi.nlm.nih.gov/compound/CHEMBL22717">. (https://pubchem.ncbi.nlm.nih.gov/compound/CHEMBL22717)</a><br>ki = 2495.0 nM<br>simil = 0.802197802198       |
| KR    |  | <u>CHEMBL2071046</u><br><a href="https://pubchem.ncbi.nlm.nih.gov/compound/CHEMBL2071046">. (https://pubchem.ncbi.nlm.nih.gov/compound/CHEMBL2071046)</a><br>ki = 408.0 nM<br>simil = 0.43137254902   |
| GRAPH |  | <u>CHEMBL1927444</u><br><a href="https://pubchem.ncbi.nlm.nih.gov/compound/CHEMBL1927444">. (https://pubchem.ncbi.nlm.nih.gov/compound/CHEMBL1927444)</a><br>ki = 1350.0 nM<br>simil = 0.760233918129 |
| SUB   |  | <u>CHEMBL460805</u><br><a href="https://pubchem.ncbi.nlm.nih.gov/compound/CHEMBL460805">. (https://pubchem.ncbi.nlm.nih.gov/compound/CHEMBL460805)</a><br>ki = 1133.0 nM<br>simil = 0.727272727273    |

HYB

(<https://pubchem.ncbi.nlm.nih.gov/compound/CHEMBL1927429>).

ki = 963.0 nM

simil = 0.815384615385

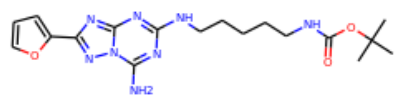

Adenosine A3 receptor: ki = N.A.00 nM Score = 3.0506

Best Fingerprints Similarity

ECFP2

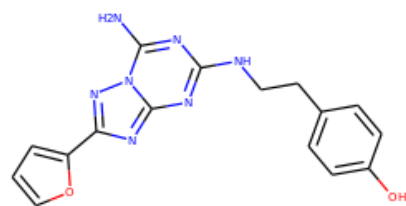

CHEMBL113142

(<https://pubchem.ncbi.nlm.nih.gov/compound/CHEMBL113142>).

ki = 300.0 nM

simil = 0.521739130435

FCFP2

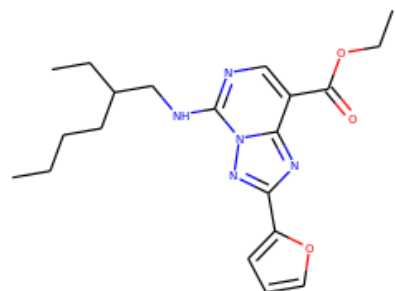

CHEMBL3314891

(<https://pubchem.ncbi.nlm.nih.gov/compound/CHEMBL3314891>).

ki = 39.3 nM

simil = 0.59375

DAY

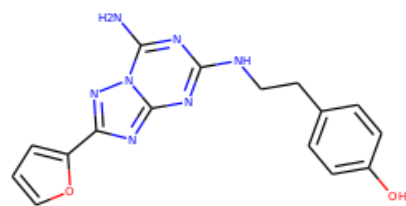

CHEMBL113142

(<https://pubchem.ncbi.nlm.nih.gov/compound/CHEMBL113142>).

ki = 300.0 nM

simil = 0.702464788732

PAT

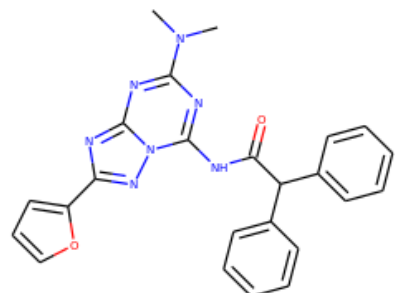

CHEMBL1089112

(<https://pubchem.ncbi.nlm.nih.gov/compound/CHEMBL1089112>).

ki = 473.0 nM

simil = 0.873394495413

PAIR

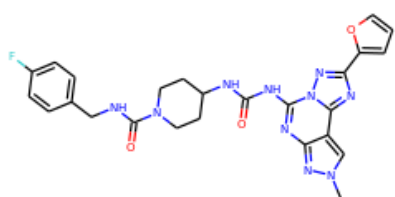

CHEMBL2071046

(<https://pubchem.ncbi.nlm.nih.gov/compound/CHEMBL2071046>).

ki = 4.9 nM

simil = 0.3125

TORS

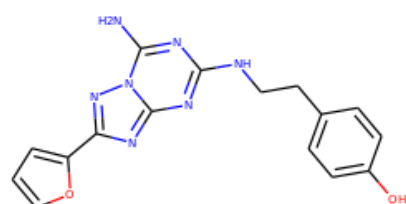

CHEMBL113142

(<https://pubchem.ncbi.nlm.nih.gov/compound/CHEMBL113142>).

ki = 300.0 nM

simil = 0.568181818182

FP2

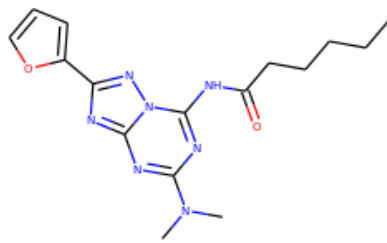

CHEMBL1089798  
(<https://pubchem.ncbi.nlm.nih.gov/compound/CHEMBL1089798>)  
ki = 2200.0 nM  
simil = 0.664804469274

PUB

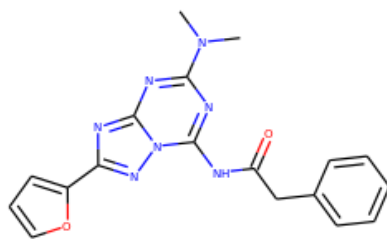

CHEMBL1089113  
(<https://pubchem.ncbi.nlm.nih.gov/compound/CHEMBL1089113>)  
ki = 1050.0 nM  
simil = 0.870813397129

MACCS

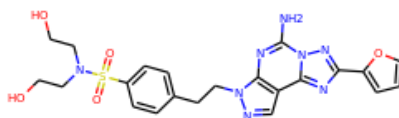

CHEMBL22717  
(<https://pubchem.ncbi.nlm.nih.gov/compound/CHEMBL22717>)  
ki = 10000.0 nM  
simil = 0.802197802198

KR

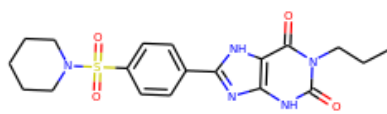

CHEMBL486281  
(<https://pubchem.ncbi.nlm.nih.gov/compound/CHEMBL486281>)  
ki = 140.0 nM  
simil = 0.442105263158

GRAPH

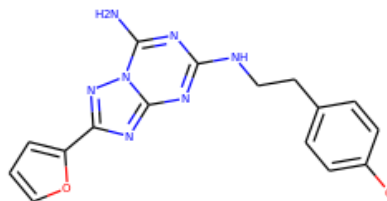

CHEMBL113142  
(<https://pubchem.ncbi.nlm.nih.gov/compound/CHEMBL113142>)  
ki = 300.0 nM  
simil = 0.757225433526

SUB

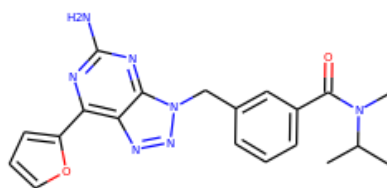

CHEMBL460805  
(<https://pubchem.ncbi.nlm.nih.gov/compound/CHEMBL460805>)  
ki = 2467.0 nM  
simil = 0.727272727273

HYB

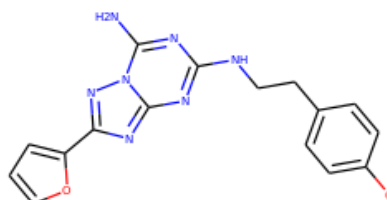

CHEMBL113142  
(<https://pubchem.ncbi.nlm.nih.gov/compound/CHEMBL113142>)  
ki = 300.0 nM  
simil = 0.738229755179
