# Supplementary material
Source: publisher figshare collection journal article supplement (https://acs.figshare.com/ndownloader/files/13834631)
Supplement: Supplementary file 9 [file 13834631]

# ChemOracle<sup>®</sup> (/)

An integrated web-based platform for target prediction: your compounds our solutions!

[HOME \(/\)](#)

[PREDICTION \(/PREDICTION/\)](#)

[ABOUT US \(/ABOUT\\_US/\)](#)

Your molecule

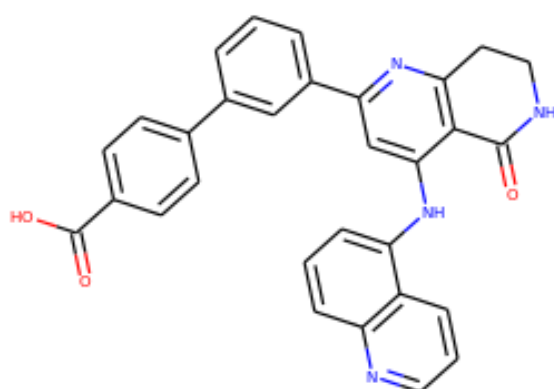

has 3 possible target(s) !

MAP kinase-activated protein kinase 2: ic50 = N.A. nM Score = 5.9216

Best Fingerprints Similarity

ECFP2

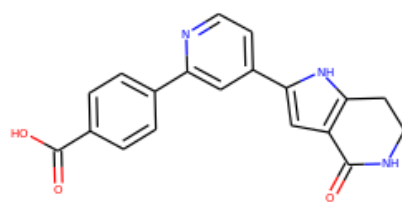

CHEMBL389658

(<https://pubchem.ncbi.nlm.nih.gov/compound/CHEMBL389658>)

ic50 = 22.0 nM

simil = 0.617647058824

FCFP2

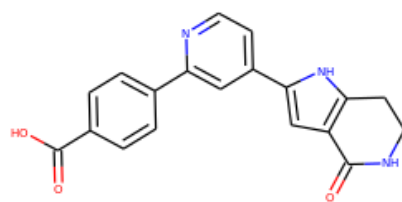

CHEMBL389658

(<https://pubchem.ncbi.nlm.nih.gov/compound/CHEMBL389658>)

ic50 = 22.0 nM

simil = 0.677419354839

DAY

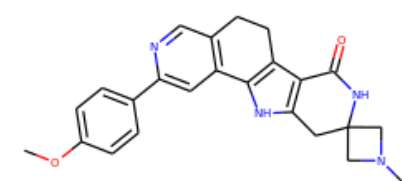

CHEMBL1801295

(<https://pubchem.ncbi.nlm.nih.gov/compound/CHEMBL1801295>)

ic50 = 45.0 nM

simil = 0.624779800352

PAT

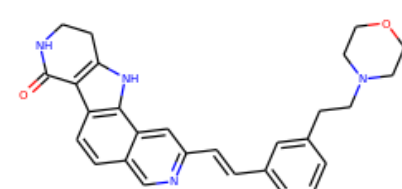

CHEMBL1801385

(<https://pubchem.ncbi.nlm.nih.gov/compound/CHEMBL1801385>)

ic50 = 5.0 nM

simil = 0.768072289157

Latest News

Website alpha-v  
Launched

October 10th, 201

Work in progress.

|       |                                                                                     |                                                                                                                                                                                                               |
|-------|-------------------------------------------------------------------------------------|---------------------------------------------------------------------------------------------------------------------------------------------------------------------------------------------------------------|
| PAIR  | 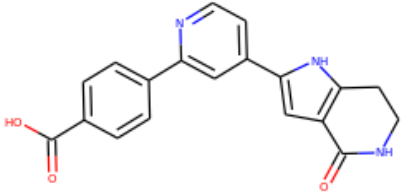   | <p><u>CHEMBL389658</u><br/> <a href="https://pubchem.ncbi.nlm.nih.gov/compound/CHEMBL389658">.https://pubchem.ncbi.nlm.nih.gov/compound/CHEMBL389658</a>)<br/> ic50 = 22.0 nM<br/> simil = 0.626865671642</p> |
| TORS  |    | <p><u>CHEMBL389658</u><br/> <a href="https://pubchem.ncbi.nlm.nih.gov/compound/CHEMBL389658">.https://pubchem.ncbi.nlm.nih.gov/compound/CHEMBL389658</a>)<br/> ic50 = 22.0 nM<br/> simil = 0.72972972973</p>  |
| FP2   |   | <p><u>CHEMBL389658</u><br/> <a href="https://pubchem.ncbi.nlm.nih.gov/compound/CHEMBL389658">.https://pubchem.ncbi.nlm.nih.gov/compound/CHEMBL389658</a>)<br/> ic50 = 22.0 nM<br/> simil = 0.708791208791</p> |
| PUB   |  | <p><u>CHEMBL389658</u><br/> <a href="https://pubchem.ncbi.nlm.nih.gov/compound/CHEMBL389658">.https://pubchem.ncbi.nlm.nih.gov/compound/CHEMBL389658</a>)<br/> ic50 = 22.0 nM<br/> simil = 0.857868020305</p> |
| MACCS |  | <p><u>CHEMBL389658</u><br/> <a href="https://pubchem.ncbi.nlm.nih.gov/compound/CHEMBL389658">.https://pubchem.ncbi.nlm.nih.gov/compound/CHEMBL389658</a>)<br/> ic50 = 22.0 nM<br/> simil = 0.897959183673</p> |
| KR    |  | <p><u>CHEMBL389658</u><br/> <a href="https://pubchem.ncbi.nlm.nih.gov/compound/CHEMBL389658">.https://pubchem.ncbi.nlm.nih.gov/compound/CHEMBL389658</a>)<br/> ic50 = 22.0 nM<br/> simil = 0.666666666667</p> |
| GRAPH |  | <p><u>CHEMBL226403</u><br/> <a href="https://pubchem.ncbi.nlm.nih.gov/compound/CHEMBL226403">.https://pubchem.ncbi.nlm.nih.gov/compound/CHEMBL226403</a>)<br/> ic50 = 8.5 nM<br/> simil = 0.816091954023</p>  |
| SUB   |                                                                                     | <p><u>CHEMBL389658</u><br/> <a href="https://pubchem.ncbi.nlm.nih.gov/compound/CHEMBL389658">.https://pubchem.ncbi.nlm.nih.gov/compound/CHEMBL389658</a>)<br/> ic50 = 22.0 nM<br/> simil = 0.833333333333</p> |

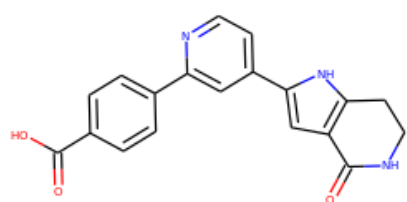

HYB

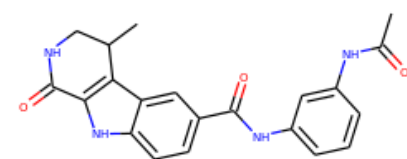

CHEMBL248333  
(<https://pubchem.ncbi.nlm.nih.gov/compound/CHEMBL248333>)  
ic50 = 4400.0 nM  
simil = 0.583529411765

Cyclin-dependent kinase 2: ic50 = N.A. nM Score = 4.3171

Best Fingerprints Similarity

ECFP2

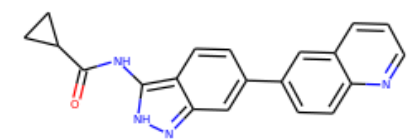

CHEMBL103099  
(<https://pubchem.ncbi.nlm.nih.gov/compound/CHEMBL103099>)  
ic50 = 1000.0 nM  
simil = 0.473684210526

FCFP2

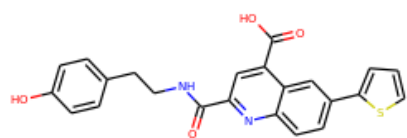

CHEMBL3099746  
(<https://pubchem.ncbi.nlm.nih.gov/compound/CHEMBL3099746>)  
ic50 = 10000.0 nM  
simil = 0.8

DAY

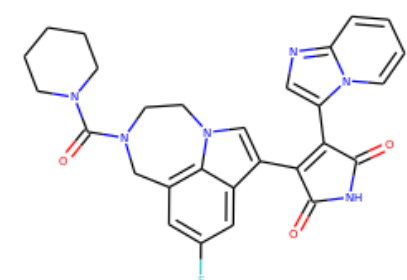

CHEMBL362558  
(<https://pubchem.ncbi.nlm.nih.gov/compound/CHEMBL362558>)  
ic50 = 2800.0 nM  
simil = 0.590665236052

PAT

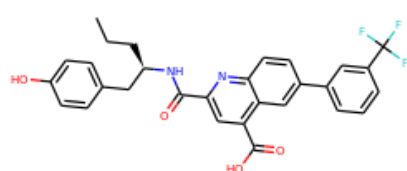

CHEMBL3099749  
(<https://pubchem.ncbi.nlm.nih.gov/compound/CHEMBL3099749>)  
ic50 = 10000.0 nM  
simil = 0.783171521036

PAIR

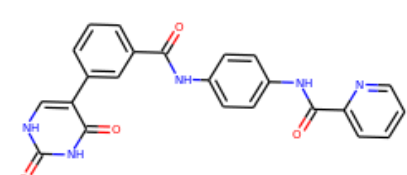

CHEMBL3343051  
(<https://pubchem.ncbi.nlm.nih.gov/compound/CHEMBL3343051>)  
ic50 = 30000.0 nM  
simil = 0.510917030568

|       |                                                                                     |                                                                                                                                                                                                                    |
|-------|-------------------------------------------------------------------------------------|--------------------------------------------------------------------------------------------------------------------------------------------------------------------------------------------------------------------|
| TORS  | 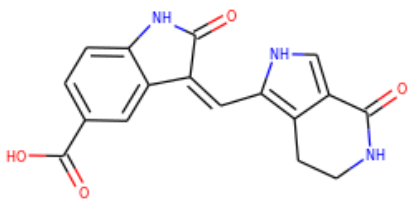   | <p><u>CHEMBL60990</u><br/> <a href="https://pubchem.ncbi.nlm.nih.gov/compound/CHEMBL60990">.https://pubchem.ncbi.nlm.nih.gov/compound/CHEMBL60990</a><br/> ic50 = 68.0 nM<br/> simil = 0.609756097561</p>          |
| FP2   |    | <p><u>CHEMBL225519</u><br/> <a href="https://pubchem.ncbi.nlm.nih.gov/compound/CHEMBL225519">.https://pubchem.ncbi.nlm.nih.gov/compound/CHEMBL225519</a><br/> ic50 = 240.0 nM<br/> simil = 0.626373626374</p>      |
| PUB   |   | <p><u>CHEMBL60990</u><br/> <a href="https://pubchem.ncbi.nlm.nih.gov/compound/CHEMBL60990">.https://pubchem.ncbi.nlm.nih.gov/compound/CHEMBL60990</a><br/> ic50 = 68.0 nM<br/> simil = 0.81067961165</p>           |
| MACCS |  | <p><u>CHEMBL60990</u><br/> <a href="https://pubchem.ncbi.nlm.nih.gov/compound/CHEMBL60990">.https://pubchem.ncbi.nlm.nih.gov/compound/CHEMBL60990</a><br/> ic50 = 68.0 nM<br/> simil = 0.814814814815</p>          |
| KR    |  | <p><u>CHEMBL3099746</u><br/> <a href="https://pubchem.ncbi.nlm.nih.gov/compound/CHEMBL3099746">.https://pubchem.ncbi.nlm.nih.gov/compound/CHEMBL3099746</a><br/> ic50 = 10000.0 nM<br/> simil = 0.508474576271</p> |
| GRAPH |  | <p><u>CHEMBL409861</u><br/> <a href="https://pubchem.ncbi.nlm.nih.gov/compound/CHEMBL409861">.https://pubchem.ncbi.nlm.nih.gov/compound/CHEMBL409861</a><br/> ic50 = 50000.0 nM<br/> simil = 0.948717948718</p>    |
| SUB   |  | <p><u>CHEMBL1243200</u><br/> <a href="https://pubchem.ncbi.nlm.nih.gov/compound/CHEMBL1243200">.https://pubchem.ncbi.nlm.nih.gov/compound/CHEMBL1243200</a><br/> ic50 = 1000.0 nM<br/> simil = 0.789473684211</p>  |

HYB

(<https://pubchem.ncbi.nlm.nih.gov/compound/CHEMBL417228>)

ic50 = 250.0 nM  
simil = 0.632941176471

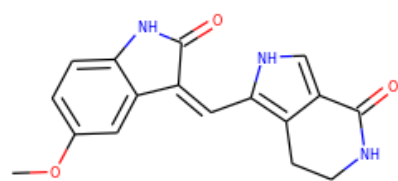

Phosphodiesterase 4B: ic50 = N.A. nM Score = 4.1472

Best Fingerprints Similarity

ECFP2

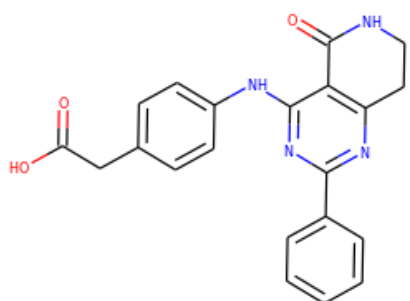

CHEMBL2442464

(<https://pubchem.ncbi.nlm.nih.gov/compound/CHEMBL2442464>)

ic50 = 47.0 nM  
simil = 0.638888888889

FCFP2

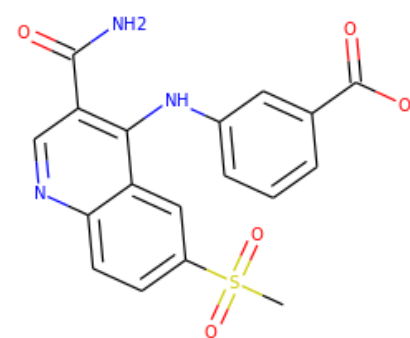

CHEMBL464615

(<https://pubchem.ncbi.nlm.nih.gov/compound/CHEMBL464615>)

ic50 = 5011.87 nM  
simil = 0.7

DAY

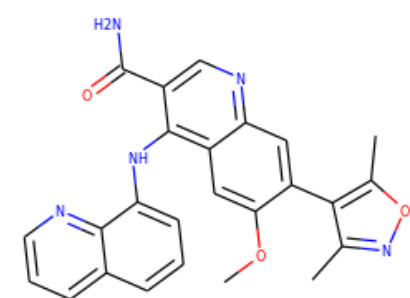

CHEMBL2017281

(<https://pubchem.ncbi.nlm.nih.gov/compound/CHEMBL2017281>)

ic50 = 50.12 nM  
simil = 0.590264941466

PAT

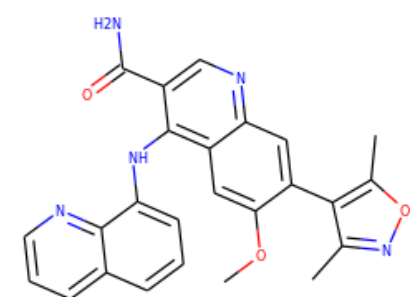

CHEMBL2017281

(<https://pubchem.ncbi.nlm.nih.gov/compound/CHEMBL2017281>)

ic50 = 50.12 nM  
simil = 0.776397515528

PAIR

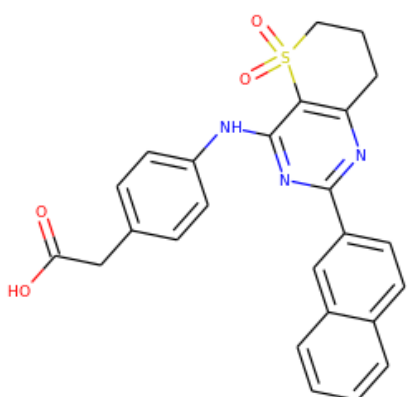

CHEMBL3114941

(<https://pubchem.ncbi.nlm.nih.gov/compound/CHEMBL3114941>)

ic50 = 19.0 nM  
simil = 0.505976095618

TORS

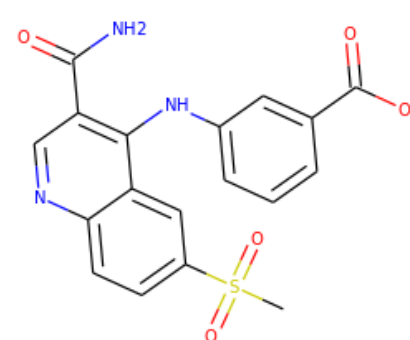

CHEMBL464615

(<https://pubchem.ncbi.nlm.nih.gov/compound/CHEMBL464615>)

ic50 = 5011.87 nM  
simil = 0.5

FP2

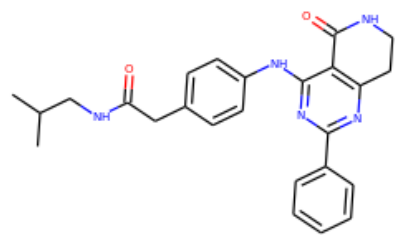

CHEMBL2442465

(<https://pubchem.ncbi.nlm.nih.gov/compound/CHEMBL2442465>)

ic50 = 7.3 nM

simil = 0.619512195122

PUB

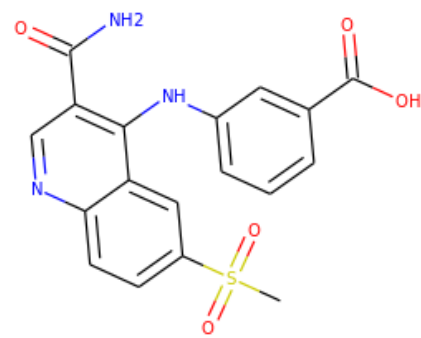

CHEMBL464615

(<https://pubchem.ncbi.nlm.nih.gov/compound/CHEMBL464615>)

ic50 = 5011.87 nM

simil = 0.786046511628

MACCS

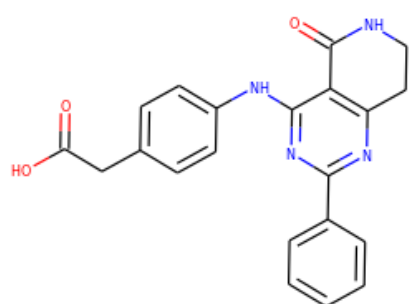

CHEMBL2442464

(<https://pubchem.ncbi.nlm.nih.gov/compound/CHEMBL2442464>)

ic50 = 47.0 nM

simil = 0.92

KR

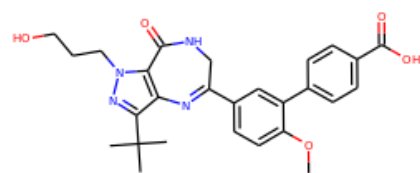

CHEMBL2387437

(<https://pubchem.ncbi.nlm.nih.gov/compound/CHEMBL2387437>)

ic50 = 27000.0 nM

simil = 0.444444444444

GRAPH

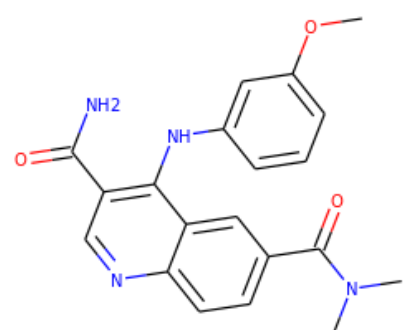

CHEMBL570956

(<https://pubchem.ncbi.nlm.nih.gov/compound/CHEMBL570956>)

ic50 = 31.62 nM

simil = 0.752808988764

SUB

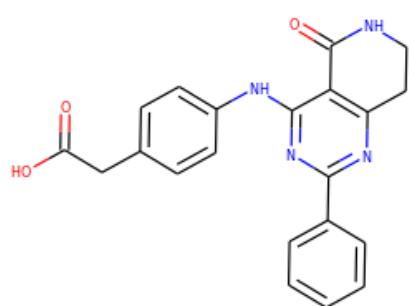

CHEMBL2442464

(<https://pubchem.ncbi.nlm.nih.gov/compound/CHEMBL2442464>)

ic50 = 47.0 nM

simil = 0.882352941176

HYB

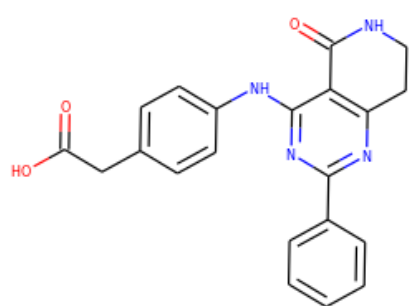

CHEMBL2442464

(<https://pubchem.ncbi.nlm.nih.gov/compound/CHEMBL2442464>)

ic50 = 47.0 nM

simil = 0.607675906183
