# Supplementary material
Source: publisher figshare collection journal article supplement (https://acs.figshare.com/ndownloader/files/13834631)
Supplement: Supplementary file 10 [file 13834631]

# SwissTargetPrediction report:

## Reference:

Gfeller D., Michielin O. & Zoete V.  
 Shaping the interaction landscape of  
 bioactive molecules, *Bioinformatics*  
 (2013) 29:3073-3079.

## Query Molecule

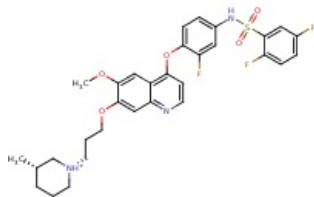

## Frequency of Target Class

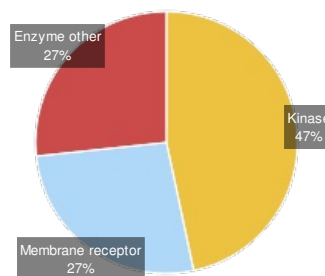

| Target                                                                 | Uniprot ID | Gene code | ChEMBL ID  | Probability            | # sim. cmpds (3D / 2D) | Target Class      |
|------------------------------------------------------------------------|------------|-----------|------------|------------------------|------------------------|-------------------|
| Tyrosine-protein kinase receptor UFO                                   | P30530     | AXL       | CHEMBL4895 | <div><div></div></div> | 12 / 2                 | Tyr Kinase        |
| Tyrosine-protein kinase receptor TYRO3 ( <i>by homology</i> )          | Q06418     | TYRO3     | CHEMBL5314 | <div><div></div></div> | 12 / 2                 | Tyr Kinase        |
| Tyrosine-protein kinase Mer ( <i>by homology</i> )                     | Q12866     | MERTK     | CHEMBL5331 | <div><div></div></div> | 13 / 2                 | Tyr Kinase        |
| Fibroblast growth factor receptor 1                                    | P11362     | FGFR1     | CHEMBL3650 | <div><div></div></div> | 58 / 9                 | Tyr Kinase        |
| Fibroblast growth factor receptor 2                                    | P21802     | FGFR2     | CHEMBL4142 | <div><div></div></div> | 58 / 9                 | Tyr Kinase        |
| Fibroblast growth factor receptor 4 ( <i>by homology</i> )             | P22455     | FGFR4     | CHEMBL3973 | <div><div></div></div> | 58 / 9                 | Tyr Kinase        |
| Fibroblast growth factor receptor 3 ( <i>by homology</i> )             | P22607     | FGFR3     | CHEMBL2742 | <div><div></div></div> | 58 / 9                 | Tyr Kinase        |
| 5-hydroxytryptamine receptor 1A                                        | P08908     | HTR1A     | CHEMBL214  | <div><div></div></div> | 201 / 64               | Membrane receptor |
| 5-hydroxytryptamine receptor 1B                                        | P28222     | HTR1B     | CHEMBL1898 | <div><div></div></div> | 209 / 65               | Membrane receptor |
| cAMP-specific 3',5'-cyclic phosphodiesterase 4A                        | P27815     | PDE4A     | CHEMBL254  | <div><div></div></div> | 10 / 2                 | Enzyme            |
| cAMP-specific 3',5'-cyclic phosphodiesterase 4B                        | Q07343     | PDE4B     | CHEMBL275  | <div><div></div></div> | 10 / 2                 | Enzyme            |
| cAMP-specific 3',5'-cyclic phosphodiesterase 4D ( <i>by homology</i> ) | Q08499     | PDE4D     | CHEMBL288  | <div><div></div></div> | 10 / 2                 | Enzyme            |
| cAMP-specific 3',5'-cyclic phosphodiesterase 4C ( <i>by homology</i> ) | Q08493     | PDE4C     | CHEMBL291  | <div><div></div></div> | 10 / 2                 | Enzyme            |
| Beta-2 adrenergic receptor                                             | P07550     | ADRB2     | CHEMBL210  | <div><div></div></div> | 3 / 80                 | Membrane receptor |
| Beta-1 adrenergic receptor                                             | P08588     | ADRB1     | CHEMBL213  | <div><div></div></div> | 3 / 83                 | Membrane receptor |
