# Supplementary material
Source: publisher figshare collection journal article supplement (https://acs.figshare.com/ndownloader/files/13834631)
Supplement: Supplementary file 11 [file 13834631]

# ChemOracle® (/)

An integrated web-based platform for target prediction: your compounds our solutions!

[HOME \(/\)](#)

[PREDICTION \(/PREDICTION/\)](#)

[ABOUT US \(/ABOUT\\_US/\)](#)

Your molecule

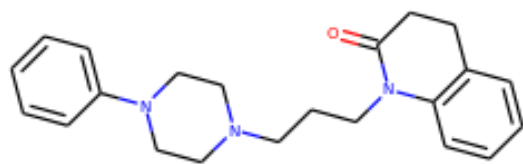

has 35 possible target(s) !

Dopamine D2 receptor: ki = N.A.00 nM Score = 10.3125

Best Fingerprints Similarity

ECFP2

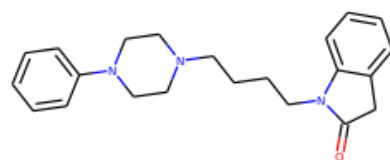

CHEMBL395933

(<https://pubchem.ncbi.nlm.nih.gov/compound/CHEMBL395933>)

ki = 162.0 nM

simil = 0.904761904762

FCFP2

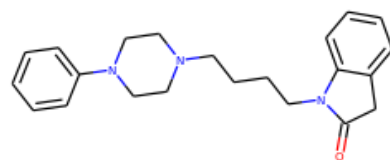

CHEMBL395933

(<https://pubchem.ncbi.nlm.nih.gov/compound/CHEMBL395933>)

ki = 162.0 nM

simil = 1.0

DAY

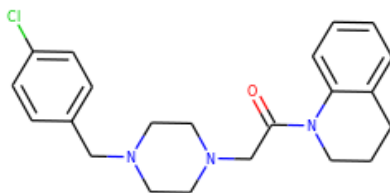

CHEMBL323537

(<https://pubchem.ncbi.nlm.nih.gov/compound/CHEMBL323537>)

ki = 2629.0 nM

simil = 0.706329113924

PAT

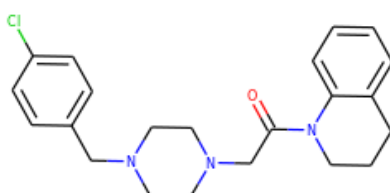

CHEMBL323537

(<https://pubchem.ncbi.nlm.nih.gov/compound/CHEMBL323537>)

ki = 2629.0 nM

simil = 0.917553191489

## Latest News

Website alpha-v  
Launched

October 10th, 201

Work in progress.

|       |                                                                                     |                                                                                                                                                                                                                                    |
|-------|-------------------------------------------------------------------------------------|------------------------------------------------------------------------------------------------------------------------------------------------------------------------------------------------------------------------------------|
| PAIR  | 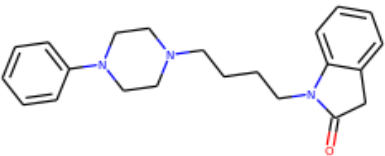   | <p><u>CHEMBL395933</u><br/> <a href="https://pubchem.ncbi.nlm.nih.gov/compound/CHEMBL395933">.https://pubchem.ncbi.nlm.nih.gov/compound/CHEMBL395933</a>)<br/>           ki = 162.0 nM<br/>           simil = 0.709401709402</p>   |
| TORS  |    | <p><u>CHEMBL104498</u><br/> <a href="https://pubchem.ncbi.nlm.nih.gov/compound/CHEMBL104498">.https://pubchem.ncbi.nlm.nih.gov/compound/CHEMBL104498</a>)<br/>           ki = 5847.0 nM<br/>           simil = 0.78125</p>         |
| FP2   |    | <p><u>CHEMBL2059305</u><br/> <a href="https://pubchem.ncbi.nlm.nih.gov/compound/CHEMBL2059305">.https://pubchem.ncbi.nlm.nih.gov/compound/CHEMBL2059305</a>)<br/>           ki = 42.0 nM<br/>           simil = 0.733944954128</p> |
| PUB   |  | <p><u>CHEMBL395933</u><br/> <a href="https://pubchem.ncbi.nlm.nih.gov/compound/CHEMBL395933">.https://pubchem.ncbi.nlm.nih.gov/compound/CHEMBL395933</a>)<br/>           ki = 162.0 nM<br/>           simil = 0.906779661017</p>   |
| MACCS |  | <p><u>CHEMBL395933</u><br/> <a href="https://pubchem.ncbi.nlm.nih.gov/compound/CHEMBL395933">.https://pubchem.ncbi.nlm.nih.gov/compound/CHEMBL395933</a>)<br/>           ki = 162.0 nM<br/>           simil = 0.934782608696</p>   |
| KR    |  | <p><u>CHEMBL395933</u><br/> <a href="https://pubchem.ncbi.nlm.nih.gov/compound/CHEMBL395933">.https://pubchem.ncbi.nlm.nih.gov/compound/CHEMBL395933</a>)<br/>           ki = 162.0 nM<br/>           simil = 0.760563380282</p>   |
| GRAPH |  | <p><u>CHEMBL383396</u><br/> <a href="https://pubchem.ncbi.nlm.nih.gov/compound/CHEMBL383396">.https://pubchem.ncbi.nlm.nih.gov/compound/CHEMBL383396</a>)<br/>           ki = 11.4 nM<br/>           simil = 0.924050632911</p>    |
| SUB   |                                                                                     | <p><u>CHEMBL314952</u><br/> <a href="https://pubchem.ncbi.nlm.nih.gov/compound/CHEMBL314952">.https://pubchem.ncbi.nlm.nih.gov/compound/CHEMBL314952</a>)<br/>           ki = 8.0 nM<br/>           simil = 1.0</p>                |

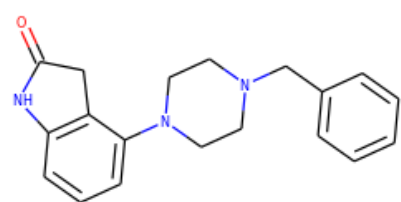

HYB

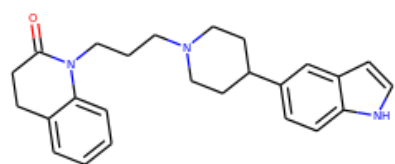

CHEMBL2059305

(<https://pubchem.ncbi.nlm.nih.gov/compound/CHEMBL2059305>)

ki = 42.0 nM

simil = 0.739473684211

Serotonin 1a (5-HT1a) receptor: ki = N.A.00 nM Score = 9.4165

Best Fingerprints Similarity

ECFP2

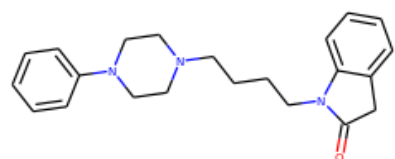

CHEMBL395933

(<https://pubchem.ncbi.nlm.nih.gov/compound/CHEMBL395933>)

ki = 124.0 nM

simil = 0.904761904762

FCFP2

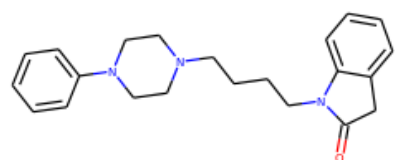

CHEMBL395933

(<https://pubchem.ncbi.nlm.nih.gov/compound/CHEMBL395933>)

ki = 124.0 nM

simil = 1.0

DAY

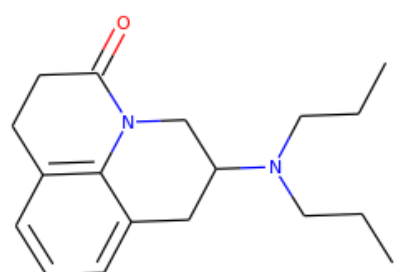

CHEMBL11577

(<https://pubchem.ncbi.nlm.nih.gov/compound/CHEMBL11577>)

ki = 2.4 nM

simil = 0.690366972477

PAT

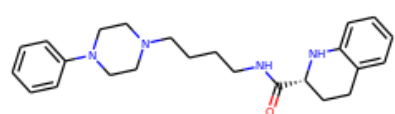

CHEMBL3358505

(<https://pubchem.ncbi.nlm.nih.gov/compound/CHEMBL3358505>)

ki = 9.9 nM

simil = 0.886243386243

PAIR

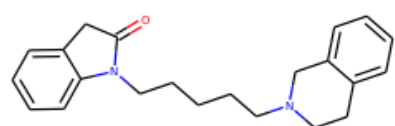

CHEMBL3321777

(<https://pubchem.ncbi.nlm.nih.gov/compound/CHEMBL3321777>)

ki = 523.0 nM

simil = 0.719298245614

|       |                                                                                     |                                                                                                                                                                                                              |
|-------|-------------------------------------------------------------------------------------|--------------------------------------------------------------------------------------------------------------------------------------------------------------------------------------------------------------|
| TORS  | 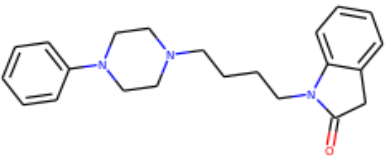   | <p><u>CHEMBL395933</u><br/> <a href="https://pubchem.ncbi.nlm.nih.gov/compound/CHEMBL395933">.https://pubchem.ncbi.nlm.nih.gov/compound/CHEMBL395933</a><br/> ki = 124.0 nM<br/> simil = 0.6875</p>          |
| FP2   |    | <p><u>CHEMBL11577</u><br/> <a href="https://pubchem.ncbi.nlm.nih.gov/compound/CHEMBL11577">.https://pubchem.ncbi.nlm.nih.gov/compound/CHEMBL11577</a><br/> ki = 2.4 nM<br/> simil = 0.768518518519</p>       |
| PUB   |    | <p><u>CHEMBL395933</u><br/> <a href="https://pubchem.ncbi.nlm.nih.gov/compound/CHEMBL395933">.https://pubchem.ncbi.nlm.nih.gov/compound/CHEMBL395933</a><br/> ki = 124.0 nM<br/> simil = 0.906779661017</p>  |
| MACCS |  | <p><u>CHEMBL506875</u><br/> <a href="https://pubchem.ncbi.nlm.nih.gov/compound/CHEMBL506875">.https://pubchem.ncbi.nlm.nih.gov/compound/CHEMBL506875</a><br/> ki = 16.0 nM<br/> simil = 0.934782608696</p>   |
| KR    |  | <p><u>CHEMBL395933</u><br/> <a href="https://pubchem.ncbi.nlm.nih.gov/compound/CHEMBL395933">.https://pubchem.ncbi.nlm.nih.gov/compound/CHEMBL395933</a><br/> ki = 124.0 nM<br/> simil = 0.760563380282</p>  |
| GRAPH |  | <p><u>CHEMBL1632210</u><br/> <a href="https://pubchem.ncbi.nlm.nih.gov/compound/CHEMBL1632210">.https://pubchem.ncbi.nlm.nih.gov/compound/CHEMBL1632210</a><br/> ki = 1.0 nM<br/> simil = 0.848101265823</p> |
| SUB   |  | <p><u>CHEMBL506875</u><br/> <a href="https://pubchem.ncbi.nlm.nih.gov/compound/CHEMBL506875">.https://pubchem.ncbi.nlm.nih.gov/compound/CHEMBL506875</a><br/> ki = 16.0 nM<br/> simil = 1.0</p>              |

HYB

[.https://pubchem.ncbi.nlm.nih.gov/compound/CHEMBL395933](https://pubchem.ncbi.nlm.nih.gov/compound/CHEMBL395933))

ki = 124.0 nM

simil = 0.611979166667

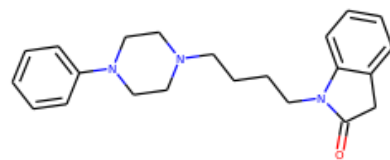

Dopamine D3 receptor: ki = N.A.00 nM Score = 9.4092

Best Fingerprints Similarity

ECFP2

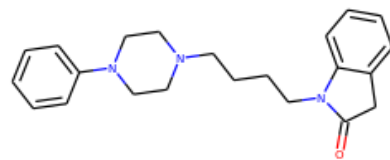

CHEMBL395933

[.https://pubchem.ncbi.nlm.nih.gov/compound/CHEMBL395933](https://pubchem.ncbi.nlm.nih.gov/compound/CHEMBL395933))

ki = 80.0 nM

simil = 0.904761904762

FCFP2

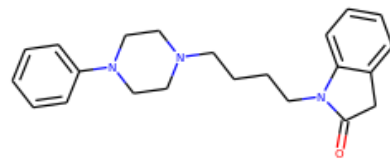

CHEMBL395933

[.https://pubchem.ncbi.nlm.nih.gov/compound/CHEMBL395933](https://pubchem.ncbi.nlm.nih.gov/compound/CHEMBL395933))

ki = 80.0 nM

simil = 1.0

DAY

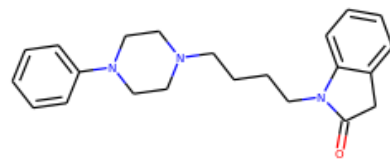

CHEMBL395933

[.https://pubchem.ncbi.nlm.nih.gov/compound/CHEMBL395933](https://pubchem.ncbi.nlm.nih.gov/compound/CHEMBL395933))

ki = 80.0 nM

simil = 0.636246786632

PAT

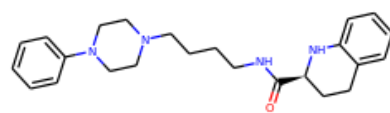

CHEMBL3358507

[.https://pubchem.ncbi.nlm.nih.gov/compound/CHEMBL3358507](https://pubchem.ncbi.nlm.nih.gov/compound/CHEMBL3358507))

ki = 45.0 nM

simil = 0.886243386243

PAIR

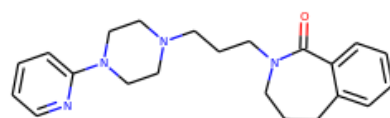

CHEMBL476841

[.https://pubchem.ncbi.nlm.nih.gov/compound/CHEMBL476841](https://pubchem.ncbi.nlm.nih.gov/compound/CHEMBL476841))

ki = 4168.69 nM

simil = 0.711111111111

TORS

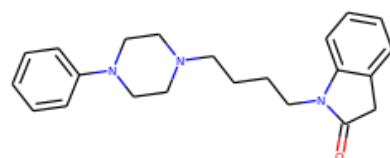

CHEMBL395933

[.https://pubchem.ncbi.nlm.nih.gov/compound/CHEMBL395933](https://pubchem.ncbi.nlm.nih.gov/compound/CHEMBL395933))

ki = 80.0 nM

simil = 0.6875

|       |                                                                                     |                                                                                                                                                                                                     |
|-------|-------------------------------------------------------------------------------------|-----------------------------------------------------------------------------------------------------------------------------------------------------------------------------------------------------|
| FP2   | 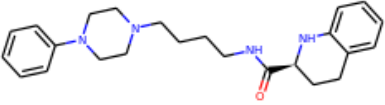   | <u>CHEMBL3358507</u><br>( <a href="https://pubchem.ncbi.nlm.nih.gov/compound/CHEMBL3358507">https://pubchem.ncbi.nlm.nih.gov/compound/CHEMBL3358507</a> )<br>ki = 45.0 nM<br>simil = 0.694444444444 |
| PUB   |    | <u>CHEMBL395933</u><br>( <a href="https://pubchem.ncbi.nlm.nih.gov/compound/CHEMBL395933">https://pubchem.ncbi.nlm.nih.gov/compound/CHEMBL395933</a> )<br>ki = 80.0 nM<br>simil = 0.906779661017    |
| MACCS |    | <u>CHEMBL395933</u><br>( <a href="https://pubchem.ncbi.nlm.nih.gov/compound/CHEMBL395933">https://pubchem.ncbi.nlm.nih.gov/compound/CHEMBL395933</a> )<br>ki = 80.0 nM<br>simil = 0.934782608696    |
| KR    |  | <u>CHEMBL395933</u><br>( <a href="https://pubchem.ncbi.nlm.nih.gov/compound/CHEMBL395933">https://pubchem.ncbi.nlm.nih.gov/compound/CHEMBL395933</a> )<br>ki = 80.0 nM<br>simil = 0.760563380282    |
| GRAPH |  | <u>CHEMBL34239</u><br>( <a href="https://pubchem.ncbi.nlm.nih.gov/compound/CHEMBL34239">https://pubchem.ncbi.nlm.nih.gov/compound/CHEMBL34239</a> )<br>ki = 2682.0 nM<br>simil = 0.910256410256     |
| SUB   |  | <u>CHEMBL314952</u><br>( <a href="https://pubchem.ncbi.nlm.nih.gov/compound/CHEMBL314952">https://pubchem.ncbi.nlm.nih.gov/compound/CHEMBL314952</a> )<br>ki = 5.4 nM<br>simil = 1.0                |
| HYB   |  | <u>CHEMBL201742</u><br>( <a href="https://pubchem.ncbi.nlm.nih.gov/compound/CHEMBL201742">https://pubchem.ncbi.nlm.nih.gov/compound/CHEMBL201742</a> )<br>ki = 93.8 nM<br>simil = 0.707259953162    |

Muscarinic acetylcholine receptor M2: ki = 257.8084 nM Score = 9.0038

Best Fingerprints Similarity



|       |                                                                                     |                                                                                                                                                                                                                    |
|-------|-------------------------------------------------------------------------------------|--------------------------------------------------------------------------------------------------------------------------------------------------------------------------------------------------------------------|
| ECFP2 | 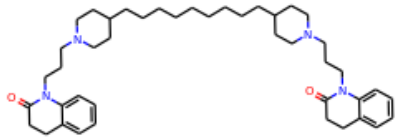   | <p><u>CHEMBL3354078</u><br/> <a href="https://pubchem.ncbi.nlm.nih.gov/compound/CHEMBL3354078">. (https://pubchem.ncbi.nlm.nih.gov/compound/CHEMBL3354078)</a><br/> ki = 79.43 nM<br/> simil = 0.75</p>            |
| FCFP2 |    | <p><u>CHEMBL3354078</u><br/> <a href="https://pubchem.ncbi.nlm.nih.gov/compound/CHEMBL3354078">. (https://pubchem.ncbi.nlm.nih.gov/compound/CHEMBL3354078)</a><br/> ki = 79.43 nM<br/> simil = 0.8125</p>          |
| DAY   |   | <p><u>CHEMBL3354065</u><br/> <a href="https://pubchem.ncbi.nlm.nih.gov/compound/CHEMBL3354065">. (https://pubchem.ncbi.nlm.nih.gov/compound/CHEMBL3354065)</a><br/> ki = 204.17 nM<br/> simil = 0.847507331378</p> |
| PAT   |  | <p><u>CHEMBL3354074</u><br/> <a href="https://pubchem.ncbi.nlm.nih.gov/compound/CHEMBL3354074">. (https://pubchem.ncbi.nlm.nih.gov/compound/CHEMBL3354074)</a><br/> ki = 208.93 nM<br/> simil = 0.89010989011</p>  |
| PAIR  |  | <p><u>CHEMBL85950</u><br/> <a href="https://pubchem.ncbi.nlm.nih.gov/compound/CHEMBL85950">. (https://pubchem.ncbi.nlm.nih.gov/compound/CHEMBL85950)</a><br/> ki = 794.33 nM<br/> simil = 0.624060150376</p>       |
| TORS  |  | <p><u>CHEMBL3354078</u><br/> <a href="https://pubchem.ncbi.nlm.nih.gov/compound/CHEMBL3354078">. (https://pubchem.ncbi.nlm.nih.gov/compound/CHEMBL3354078)</a><br/> ki = 79.43 nM<br/> simil = 0.806451612903</p>  |
| FP2   |  | <p><u>CHEMBL3354078</u><br/> <a href="https://pubchem.ncbi.nlm.nih.gov/compound/CHEMBL3354078">. (https://pubchem.ncbi.nlm.nih.gov/compound/CHEMBL3354078)</a><br/> ki = 79.43 nM<br/> simil = 0.824742268041</p>  |
| PUB   |                                                                                     | <p><u>CHEMBL3354065</u><br/> <a href="https://pubchem.ncbi.nlm.nih.gov/compound/CHEMBL3354065">. (https://pubchem.ncbi.nlm.nih.gov/compound/CHEMBL3354065)</a><br/> ki = 204.17 nM<br/> simil = 0.905982905983</p> |

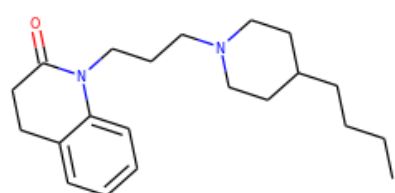

MACCS

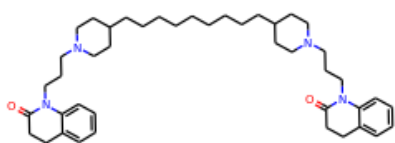

CHEMBL3354078

(<https://pubchem.ncbi.nlm.nih.gov/compound/CHEMBL3354078>)

ki = 79.43 nM

simil = 0.891304347826

CHEMBL3354078

(<https://pubchem.ncbi.nlm.nih.gov/compound/CHEMBL3354078>)

ki = 79.43 nM

simil = 0.602409638554

CHEMBL3354078

(<https://pubchem.ncbi.nlm.nih.gov/compound/CHEMBL3354078>)

ki = 79.43 nM

simil = 0.864864864865

SUB

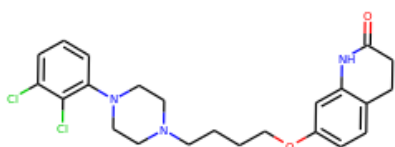

CHEMBL1112 (<https://pubchem.ncbi.nlm.nih.gov/compound/CHEMBL1112>)

ki = 1000.0 nM

simil = 0.857142857143

HYB

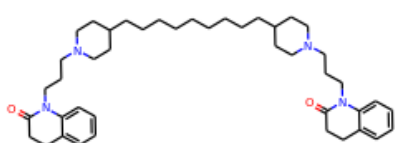

CHEMBL3354078

(<https://pubchem.ncbi.nlm.nih.gov/compound/CHEMBL3354078>)

ki = 79.43 nM

simil = 0.786350148368

Muscarinic acetylcholine receptor M3: ki = N.A.00 nM Score = 9.0038

Best Fingerprints Similarity

ECFP2

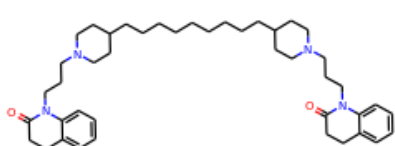

CHEMBL3354078

(<https://pubchem.ncbi.nlm.nih.gov/compound/CHEMBL3354078>)

ki = 57.54 nM

simil = 0.75



|       |                                                                                     |                                                                                                                                                                                                        |
|-------|-------------------------------------------------------------------------------------|--------------------------------------------------------------------------------------------------------------------------------------------------------------------------------------------------------|
| FCFP2 | 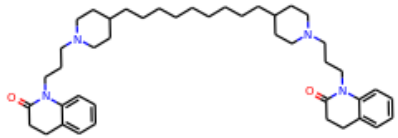   | <u>CHEMBL3354078</u><br>( <a href="https://pubchem.ncbi.nlm.nih.gov/compound/CHEMBL3354078">https://pubchem.ncbi.nlm.nih.gov/compound/CHEMBL3354078</a> )<br>ki = 57.54 nM<br>simil = 0.8125           |
| DAY   |    | <u>CHEMBL3354065</u><br>( <a href="https://pubchem.ncbi.nlm.nih.gov/compound/CHEMBL3354065">https://pubchem.ncbi.nlm.nih.gov/compound/CHEMBL3354065</a> )<br>ki = 1202.26 nM<br>simil = 0.847507331378 |
| PAT   |    | <u>CHEMBL3354074</u><br>( <a href="https://pubchem.ncbi.nlm.nih.gov/compound/CHEMBL3354074">https://pubchem.ncbi.nlm.nih.gov/compound/CHEMBL3354074</a> )<br>ki = 630.96 nM<br>simil = 0.89010989011   |
| PAIR  |  | <u>CHEMBL85950</u><br>( <a href="https://pubchem.ncbi.nlm.nih.gov/compound/CHEMBL85950">https://pubchem.ncbi.nlm.nih.gov/compound/CHEMBL85950</a> )<br>ki = 79.43 nM<br>simil = 0.624060150376         |
| TORS  |  | <u>CHEMBL3354078</u><br>( <a href="https://pubchem.ncbi.nlm.nih.gov/compound/CHEMBL3354078">https://pubchem.ncbi.nlm.nih.gov/compound/CHEMBL3354078</a> )<br>ki = 57.54 nM<br>simil = 0.806451612903   |
| FP2   |  | <u>CHEMBL3354078</u><br>( <a href="https://pubchem.ncbi.nlm.nih.gov/compound/CHEMBL3354078">https://pubchem.ncbi.nlm.nih.gov/compound/CHEMBL3354078</a> )<br>ki = 57.54 nM<br>simil = 0.824742268041   |
| PUB   |  | <u>CHEMBL3354065</u><br>( <a href="https://pubchem.ncbi.nlm.nih.gov/compound/CHEMBL3354065">https://pubchem.ncbi.nlm.nih.gov/compound/CHEMBL3354065</a> )<br>ki = 1202.26 nM<br>simil = 0.905982905983 |
| MACCS |                                                                                     | <u>CHEMBL3354078</u><br>( <a href="https://pubchem.ncbi.nlm.nih.gov/compound/CHEMBL3354078">https://pubchem.ncbi.nlm.nih.gov/compound/CHEMBL3354078</a> )<br>ki = 57.54 nM<br>simil = 0.891304347826   |

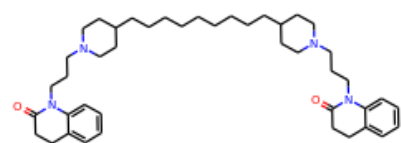

KR

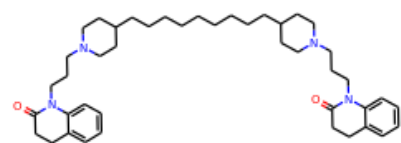

CHEMBL3354078

(<https://pubchem.ncbi.nlm.nih.gov/compound/CHEMBL3354078>)

ki = 57.54 nM

simil = 0.602409638554

GRAPH

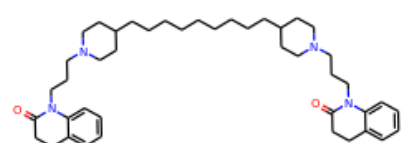

CHEMBL3354078

(<https://pubchem.ncbi.nlm.nih.gov/compound/CHEMBL3354078>)

ki = 57.54 nM

simil = 0.864864864865

SUB

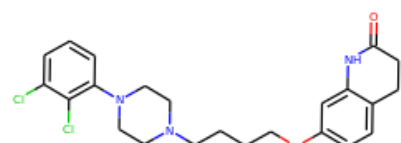

CHEMBL1112 (<https://pubchem.ncbi.nlm.nih.gov/compound/CHEMBL1112>)

ki = 1000.0 nM

simil = 0.857142857143

HYB

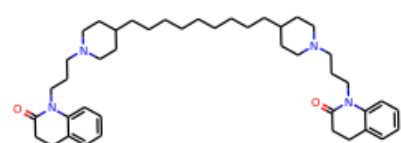

CHEMBL3354078

(<https://pubchem.ncbi.nlm.nih.gov/compound/CHEMBL3354078>)

ki = 57.54 nM

simil = 0.786350148368

Serotonin 7 (5-HT7) receptor: ki = 64.5988 nM Score = 8.644

Best Fingerprints Similarity

ECFP2

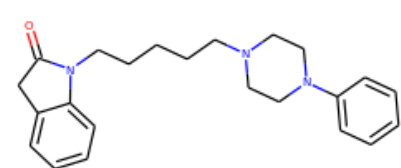

CHEMBL489029

(<https://pubchem.ncbi.nlm.nih.gov/compound/CHEMBL489029>)

ki = 63.0 nM

simil = 0.904761904762

FCFP2

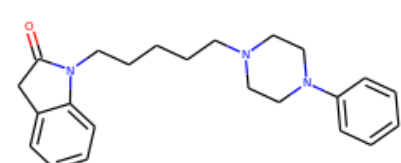

CHEMBL489029

(<https://pubchem.ncbi.nlm.nih.gov/compound/CHEMBL489029>)

ki = 63.0 nM

simil = 1.0

|       |                                                                                     |                                                                                                                                                                                                                                    |
|-------|-------------------------------------------------------------------------------------|------------------------------------------------------------------------------------------------------------------------------------------------------------------------------------------------------------------------------------|
| DAY   | 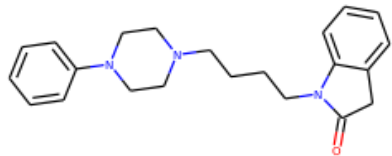   | <p><u>CHEMBL395933</u><br/> <a href="https://pubchem.ncbi.nlm.nih.gov/compound/CHEMBL395933">.https://pubchem.ncbi.nlm.nih.gov/compound/CHEMBL395933</a>)<br/>           ki = 74.0 nM<br/>           simil = 0.636246786632</p>    |
| PAT   |    | <p><u>CHEMBL395933</u><br/> <a href="https://pubchem.ncbi.nlm.nih.gov/compound/CHEMBL395933">.https://pubchem.ncbi.nlm.nih.gov/compound/CHEMBL395933</a>)<br/>           ki = 74.0 nM<br/>           simil = 0.880319148936</p>    |
| PAIR  |    | <p><u>CHEMBL3321777</u><br/> <a href="https://pubchem.ncbi.nlm.nih.gov/compound/CHEMBL3321777">.https://pubchem.ncbi.nlm.nih.gov/compound/CHEMBL3321777</a>)<br/>           ki = 28.0 nM<br/>           simil = 0.719298245614</p> |
| TORS  |  | <p><u>CHEMBL489029</u><br/> <a href="https://pubchem.ncbi.nlm.nih.gov/compound/CHEMBL489029">.https://pubchem.ncbi.nlm.nih.gov/compound/CHEMBL489029</a>)<br/>           ki = 63.0 nM<br/>           simil = 0.6875</p>            |
| FP2   |  | <p><u>CHEMBL395933</u><br/> <a href="https://pubchem.ncbi.nlm.nih.gov/compound/CHEMBL395933">.https://pubchem.ncbi.nlm.nih.gov/compound/CHEMBL395933</a>)<br/>           ki = 74.0 nM<br/>           simil = 0.67619047619</p>     |
| PUB   |  | <p><u>CHEMBL489029</u><br/> <a href="https://pubchem.ncbi.nlm.nih.gov/compound/CHEMBL489029">.https://pubchem.ncbi.nlm.nih.gov/compound/CHEMBL489029</a>)<br/>           ki = 63.0 nM<br/>           simil = 0.906779661017</p>    |
| MACCS |  | <p><u>CHEMBL489028</u><br/> <a href="https://pubchem.ncbi.nlm.nih.gov/compound/CHEMBL489028">.https://pubchem.ncbi.nlm.nih.gov/compound/CHEMBL489028</a>)<br/>           ki = 22.0 nM<br/>           simil = 0.934782608696</p>    |
| KR    |                                                                                     | <p><u>CHEMBL395933</u><br/> <a href="https://pubchem.ncbi.nlm.nih.gov/compound/CHEMBL395933">.https://pubchem.ncbi.nlm.nih.gov/compound/CHEMBL395933</a>)<br/>           ki = 74.0 nM<br/>           simil = 0.760563380282</p>    |

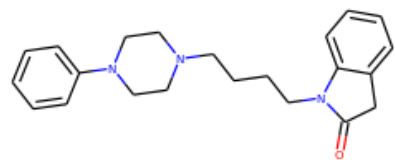

GRAPH

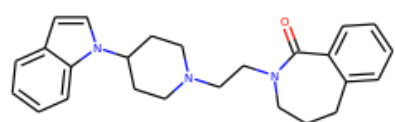

CHEMBL9952 (<https://pubchem.ncbi.nlm.nih.gov/compound/CHEMBL9952>)

ki = 2.754 nM

simil = 0.85

SUB

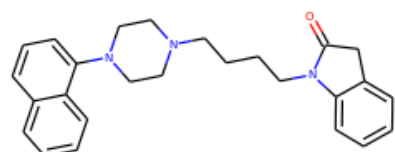

CHEMBL489028

(<https://pubchem.ncbi.nlm.nih.gov/compound/CHEMBL489028>)

ki = 22.0 nM

simil = 1.0

HYB

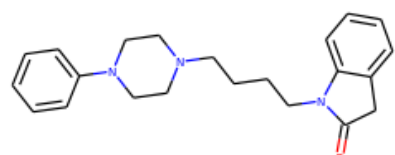

CHEMBL395933

(<https://pubchem.ncbi.nlm.nih.gov/compound/CHEMBL395933>)

ki = 74.0 nM

simil = 0.611979166667

Muscarinic acetylcholine receptor M1: ki = 214.5401 nM Score = 8.3798

Best Fingerprints Similarity

ECFP2

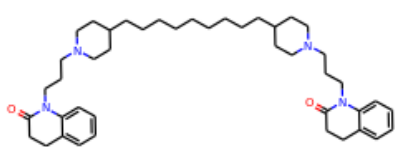

CHEMBL3354078

(<https://pubchem.ncbi.nlm.nih.gov/compound/CHEMBL3354078>)

ki = 29.51 nM

simil = 0.75

FCFP2

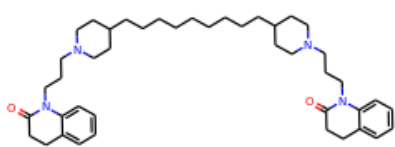

CHEMBL3354078

(<https://pubchem.ncbi.nlm.nih.gov/compound/CHEMBL3354078>)

ki = 29.51 nM

simil = 0.8125

DAY

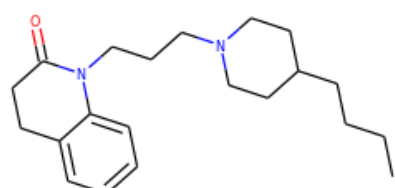

CHEMBL3354065

(<https://pubchem.ncbi.nlm.nih.gov/compound/CHEMBL3354065>)

ki = 316.23 nM

simil = 0.847507331378

PAT

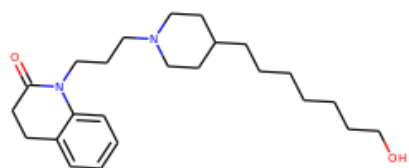

CHEMBL3354074  
(<https://pubchem.ncbi.nlm.nih.gov/compound/CHEMBL3354074>)  
ki = 354.81 nM  
simil = 0.89010989011

PAIR

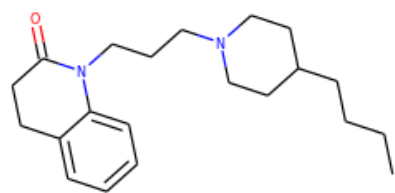

CHEMBL3354065  
(<https://pubchem.ncbi.nlm.nih.gov/compound/CHEMBL3354065>)  
ki = 316.23 nM  
simil = 0.52380952381

TORS

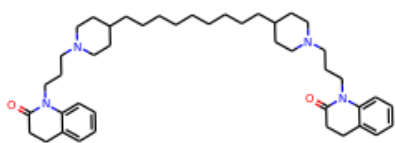

CHEMBL3354078  
(<https://pubchem.ncbi.nlm.nih.gov/compound/CHEMBL3354078>)  
ki = 29.51 nM  
simil = 0.806451612903

FP2

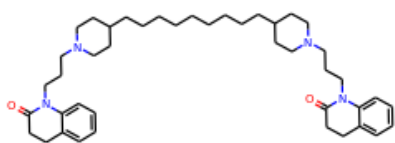

CHEMBL3354078  
(<https://pubchem.ncbi.nlm.nih.gov/compound/CHEMBL3354078>)  
ki = 29.51 nM  
simil = 0.824742268041

PUB

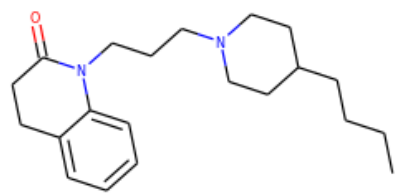

CHEMBL3354065  
(<https://pubchem.ncbi.nlm.nih.gov/compound/CHEMBL3354065>)  
ki = 316.23 nM  
simil = 0.905982905983

MACCS

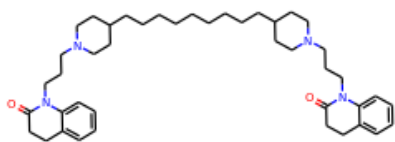

CHEMBL3354078  
(<https://pubchem.ncbi.nlm.nih.gov/compound/CHEMBL3354078>)  
ki = 29.51 nM  
simil = 0.891304347826

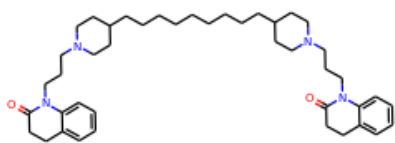

KR

CHEMBL3354078  
(<https://pubchem.ncbi.nlm.nih.gov/compound/CHEMBL3354078>)  
ki = 29.51 nM  
simil = 0.602409638554

GRAPH

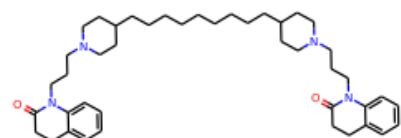

CHEMBL3354078  
(<https://pubchem.ncbi.nlm.nih.gov/compound/CHEMBL3354078>)  
ki = 29.51 nM  
simil = 0.864864864865

SUB

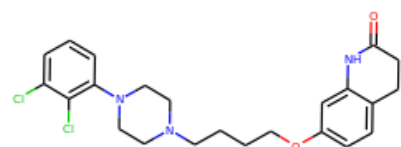

CHEMBL1112 (<https://pubchem.ncbi.nlm.nih.gov/compound/CHEMBL1112>)  
ki = 1000.0 nM  
simil = 0.857142857143

HYB

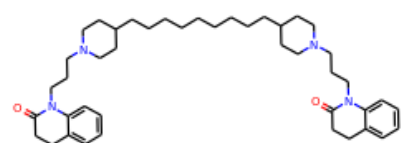

CHEMBL3354078  
(<https://pubchem.ncbi.nlm.nih.gov/compound/CHEMBL3354078>)  
ki = 29.51 nM  
simil = 0.786350148368

Muscarinic acetylcholine receptor M5: ki = 2496.1638 nM Score = 8.3798

Best Fingerprints Similarity

ECFP2

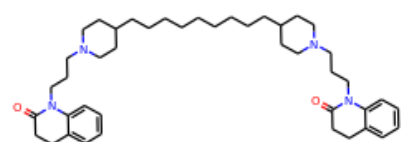

CHEMBL3354078  
(<https://pubchem.ncbi.nlm.nih.gov/compound/CHEMBL3354078>)  
ki = 48.98 nM  
simil = 0.75

FCFP2

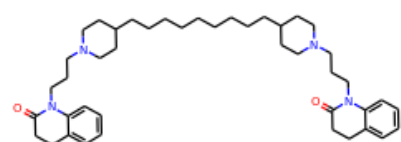

CHEMBL3354078  
(<https://pubchem.ncbi.nlm.nih.gov/compound/CHEMBL3354078>)  
ki = 48.98 nM  
simil = 0.8125

DAY

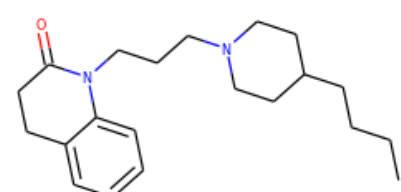

CHEMBL3354065  
(<https://pubchem.ncbi.nlm.nih.gov/compound/CHEMBL3354065>)  
ki = 5370.32 nM  
simil = 0.847507331378

PAT

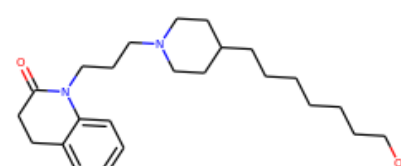

CHEMBL3354074  
(<https://pubchem.ncbi.nlm.nih.gov/compound/CHEMBL3354074>)  
ki = 3090.3 nM  
simil = 0.89010989011



PAIR

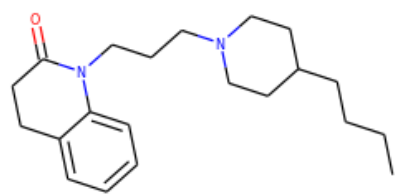

CHEMBL3354065  
(<https://pubchem.ncbi.nlm.nih.gov/compound/CHEMBL3354065>)  
ki = 5370.32 nM  
simil = 0.52380952381

TORS

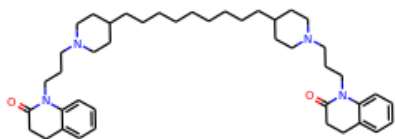

CHEMBL3354078  
(<https://pubchem.ncbi.nlm.nih.gov/compound/CHEMBL3354078>)  
ki = 48.98 nM  
simil = 0.806451612903

FP2

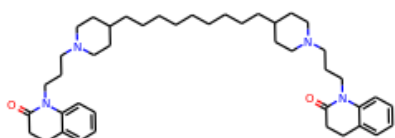

CHEMBL3354078  
(<https://pubchem.ncbi.nlm.nih.gov/compound/CHEMBL3354078>)  
ki = 48.98 nM  
simil = 0.824742268041

PUB

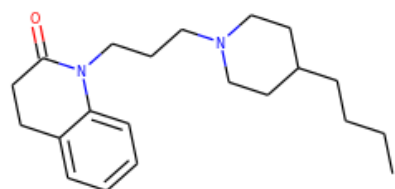

CHEMBL3354065  
(<https://pubchem.ncbi.nlm.nih.gov/compound/CHEMBL3354065>)  
ki = 5370.32 nM  
simil = 0.905982905983

MACCS

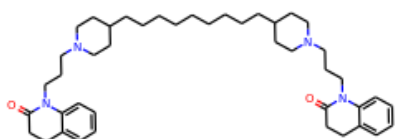

CHEMBL3354078  
(<https://pubchem.ncbi.nlm.nih.gov/compound/CHEMBL3354078>)  
ki = 48.98 nM  
simil = 0.891304347826

KR

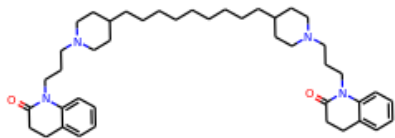

CHEMBL3354078  
(<https://pubchem.ncbi.nlm.nih.gov/compound/CHEMBL3354078>)  
ki = 48.98 nM  
simil = 0.602409638554

GRAPH

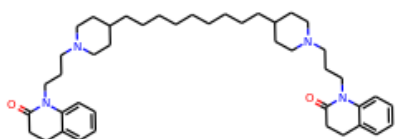

CHEMBL3354078  
(<https://pubchem.ncbi.nlm.nih.gov/compound/CHEMBL3354078>)  
ki = 48.98 nM  
simil = 0.864864864865

SUB 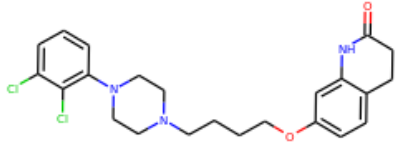 [CHEMBL1112 \(https://pubchem.ncbi.nlm.nih.gov/compound/CHEMBL1112\)](https://pubchem.ncbi.nlm.nih.gov/compound/CHEMBL1112)  
ki = 1000.0 nM  
simil = 0.857142857143

HYB  [CHEMBL3354078  
\(https://pubchem.ncbi.nlm.nih.gov/compound/CHEMBL3354078\)](https://pubchem.ncbi.nlm.nih.gov/compound/CHEMBL3354078)  
ki = 48.98 nM  
simil = 0.786350148368

Muscarinic acetylcholine receptor M4: ki = 150.2055 nM Score = 8.3798

Best Fingerprints Similarity

ECFP2 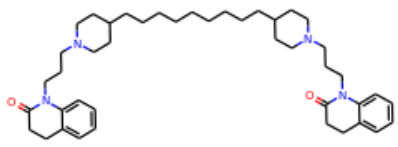 [CHEMBL3354078  
\(https://pubchem.ncbi.nlm.nih.gov/compound/CHEMBL3354078\)](https://pubchem.ncbi.nlm.nih.gov/compound/CHEMBL3354078)  
ki = 32.36 nM  
simil = 0.75

FCFP2 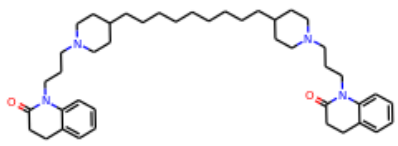 [CHEMBL3354078  
\(https://pubchem.ncbi.nlm.nih.gov/compound/CHEMBL3354078\)](https://pubchem.ncbi.nlm.nih.gov/compound/CHEMBL3354078)  
ki = 32.36 nM  
simil = 0.8125

DAY 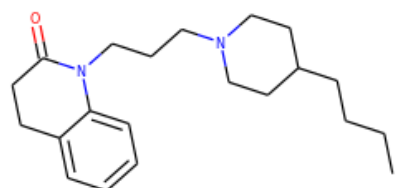 [CHEMBL3354065  
\(https://pubchem.ncbi.nlm.nih.gov/compound/CHEMBL3354065\)](https://pubchem.ncbi.nlm.nih.gov/compound/CHEMBL3354065)  
ki = 208.93 nM  
simil = 0.847507331378

PAT 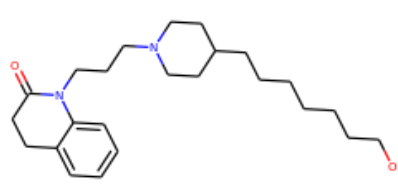 [CHEMBL3354074  
\(https://pubchem.ncbi.nlm.nih.gov/compound/CHEMBL3354074\)](https://pubchem.ncbi.nlm.nih.gov/compound/CHEMBL3354074)  
ki = 389.05 nM  
simil = 0.89010989011

PAIR 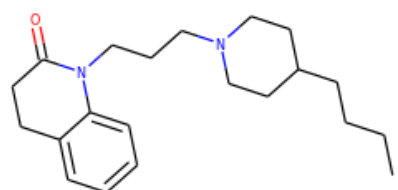 [CHEMBL3354065  
\(https://pubchem.ncbi.nlm.nih.gov/compound/CHEMBL3354065\)](https://pubchem.ncbi.nlm.nih.gov/compound/CHEMBL3354065)  
ki = 208.93 nM  
simil = 0.52380952381

|       |                                                                                     |                                                                                                                                                                                                                                        |
|-------|-------------------------------------------------------------------------------------|----------------------------------------------------------------------------------------------------------------------------------------------------------------------------------------------------------------------------------------|
| TORS  | 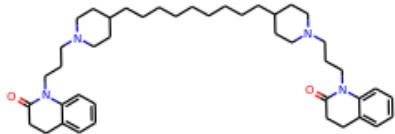   | <p><u>CHEMBL3354078</u><br/> <a href="https://pubchem.ncbi.nlm.nih.gov/compound/CHEMBL3354078">. (https://pubchem.ncbi.nlm.nih.gov/compound/CHEMBL3354078)</a><br/>           ki = 32.36 nM<br/>           simil = 0.806451612903</p>  |
| FP2   |    | <p><u>CHEMBL3354078</u><br/> <a href="https://pubchem.ncbi.nlm.nih.gov/compound/CHEMBL3354078">. (https://pubchem.ncbi.nlm.nih.gov/compound/CHEMBL3354078)</a><br/>           ki = 32.36 nM<br/>           simil = 0.824742268041</p>  |
| PUB   |   | <p><u>CHEMBL3354065</u><br/> <a href="https://pubchem.ncbi.nlm.nih.gov/compound/CHEMBL3354065">. (https://pubchem.ncbi.nlm.nih.gov/compound/CHEMBL3354065)</a><br/>           ki = 208.93 nM<br/>           simil = 0.905982905983</p> |
| MACCS |  | <p><u>CHEMBL3354078</u><br/> <a href="https://pubchem.ncbi.nlm.nih.gov/compound/CHEMBL3354078">. (https://pubchem.ncbi.nlm.nih.gov/compound/CHEMBL3354078)</a><br/>           ki = 32.36 nM<br/>           simil = 0.891304347826</p>  |
| KR    |  | <p><u>CHEMBL3354078</u><br/> <a href="https://pubchem.ncbi.nlm.nih.gov/compound/CHEMBL3354078">. (https://pubchem.ncbi.nlm.nih.gov/compound/CHEMBL3354078)</a><br/>           ki = 32.36 nM<br/>           simil = 0.602409638554</p>  |
| GRAPH |  | <p><u>CHEMBL3354078</u><br/> <a href="https://pubchem.ncbi.nlm.nih.gov/compound/CHEMBL3354078">. (https://pubchem.ncbi.nlm.nih.gov/compound/CHEMBL3354078)</a><br/>           ki = 32.36 nM<br/>           simil = 0.864864864865</p>  |
| SUB   |  | <p><u>CHEMBL1112</u> (<a href="https://pubchem.ncbi.nlm.nih.gov/compound/CHEMBL1112">https://pubchem.ncbi.nlm.nih.gov/compound/CHEMBL1112</a>)<br/>           ki = 1000.0 nM<br/>           simil = 0.857142857143</p>                 |
| HYB   |                                                                                     | <p><u>CHEMBL3354078</u><br/> <a href="https://pubchem.ncbi.nlm.nih.gov/compound/CHEMBL3354078">. (https://pubchem.ncbi.nlm.nih.gov/compound/CHEMBL3354078)</a><br/>           ki = 32.36 nM<br/>           simil = 0.786350148368</p>  |



Serotonin 2a (5-HT2a) receptor:  $k_i$  = N.A.00 nM Score = 7.8079

Best Fingerprints Similarity

ECFP2

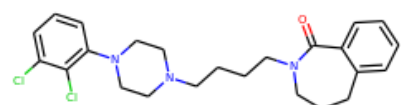

CHEMBL476394

(<https://pubchem.ncbi.nlm.nih.gov/compound/CHEMBL476394>)

$k_i$  = 10.0 nM

simil = 0.607142857143

FCFP2

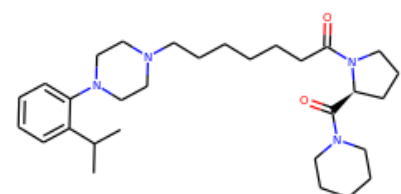

CHEMBL3409037

(<https://pubchem.ncbi.nlm.nih.gov/compound/CHEMBL3409037>)

$k_i$  = 2148.0 nM

simil = 0.823529411765

DAY

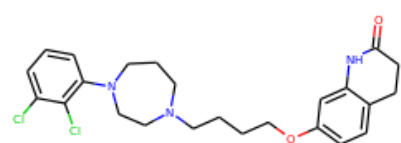

CHEMBL2165126

(<https://pubchem.ncbi.nlm.nih.gov/compound/CHEMBL2165126>)

$k_i$  = 0.6 nM

simil = 0.575824175824

PAT

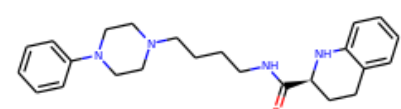

CHEMBL3358507

(<https://pubchem.ncbi.nlm.nih.gov/compound/CHEMBL3358507>)

$k_i$  = 22.0 nM

simil = 0.886243386243

PAIR

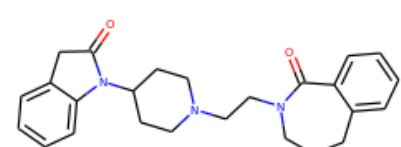

CHEMBL275258

(<https://pubchem.ncbi.nlm.nih.gov/compound/CHEMBL275258>)

$k_i$  = 223.87 nM

simil = 0.633333333333

TORS

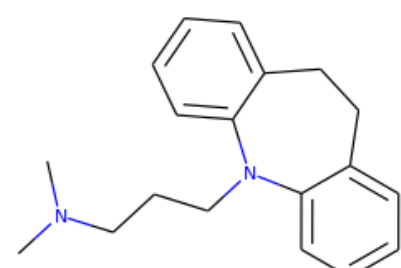

CHEMBL11 (<https://pubchem.ncbi.nlm.nih.gov/compound/CHEMBL11>)

$k_i$  = 94.0 nM

simil = 0.642857142857

|       |                                                                                     |                                                                                                                                                                                                                                        |
|-------|-------------------------------------------------------------------------------------|----------------------------------------------------------------------------------------------------------------------------------------------------------------------------------------------------------------------------------------|
| FP2   | 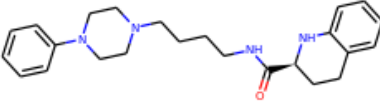   | <p><u>CHEMBL3358507</u><br/> <a href="https://pubchem.ncbi.nlm.nih.gov/compound/CHEMBL3358507">. (https://pubchem.ncbi.nlm.nih.gov/compound/CHEMBL3358507)</a><br/>           ki = 22.0 nM<br/>           simil = 0.694444444444</p>   |
| PUB   |    | <p><u>CHEMBL3358507</u><br/> <a href="https://pubchem.ncbi.nlm.nih.gov/compound/CHEMBL3358507">. (https://pubchem.ncbi.nlm.nih.gov/compound/CHEMBL3358507)</a><br/>           ki = 22.0 nM<br/>           simil = 0.870967741935</p>   |
| MACCS |   | <p><u>CHEMBL275258</u><br/> <a href="https://pubchem.ncbi.nlm.nih.gov/compound/CHEMBL275258">. (https://pubchem.ncbi.nlm.nih.gov/compound/CHEMBL275258)</a><br/>           ki = 223.87 nM<br/>           simil = 0.897959183673</p>    |
| KR    |  | <p><u>CHEMBL2237162</u><br/> <a href="https://pubchem.ncbi.nlm.nih.gov/compound/CHEMBL2237162">. (https://pubchem.ncbi.nlm.nih.gov/compound/CHEMBL2237162)</a><br/>           ki = 181.97 nM<br/>           simil = 0.662337662338</p> |
| GRAPH |  | <p><u>CHEMBL473981</u><br/> <a href="https://pubchem.ncbi.nlm.nih.gov/compound/CHEMBL473981">. (https://pubchem.ncbi.nlm.nih.gov/compound/CHEMBL473981)</a><br/>           ki = 292.0 nM<br/>           simil = 0.860465116279</p>     |
| SUB   |  | <p><u>CHEMBL3409039</u><br/> <a href="https://pubchem.ncbi.nlm.nih.gov/compound/CHEMBL3409039">. (https://pubchem.ncbi.nlm.nih.gov/compound/CHEMBL3409039)</a><br/>           ki = 1684.0 nM<br/>           simil = 0.923076923077</p> |
| HYB   |  | <p><u>CHEMBL275258</u><br/> <a href="https://pubchem.ncbi.nlm.nih.gov/compound/CHEMBL275258">. (https://pubchem.ncbi.nlm.nih.gov/compound/CHEMBL275258)</a><br/>           ki = 223.87 nM<br/>           simil = 0.541474654378</p>    |

Dopamine D5 receptor: ki = 259.0052 nM Score = 7.7841

Best Fingerprints Similarity

|       |                                                                                     |                                                                                                                                                                                                                                                                  |
|-------|-------------------------------------------------------------------------------------|------------------------------------------------------------------------------------------------------------------------------------------------------------------------------------------------------------------------------------------------------------------|
| ECFP2 | 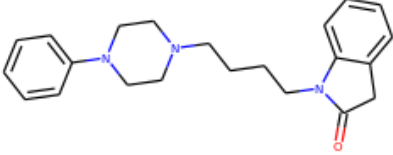   | <a href="https://pubchem.ncbi.nlm.nih.gov/compound/CHEMBL395933">CHEMBL395933</a><br><a href="https://pubchem.ncbi.nlm.nih.gov/compound/CHEMBL395933">. (https://pubchem.ncbi.nlm.nih.gov/compound/CHEMBL395933).</a><br>ki = 313.0 nM<br>simil = 0.904761904762 |
| FCFP2 |    | <a href="https://pubchem.ncbi.nlm.nih.gov/compound/CHEMBL395933">CHEMBL395933</a><br><a href="https://pubchem.ncbi.nlm.nih.gov/compound/CHEMBL395933">. (https://pubchem.ncbi.nlm.nih.gov/compound/CHEMBL395933).</a><br>ki = 313.0 nM<br>simil = 1.0            |
| DAY   |   | <a href="https://pubchem.ncbi.nlm.nih.gov/compound/CHEMBL395933">CHEMBL395933</a><br><a href="https://pubchem.ncbi.nlm.nih.gov/compound/CHEMBL395933">. (https://pubchem.ncbi.nlm.nih.gov/compound/CHEMBL395933).</a><br>ki = 313.0 nM<br>simil = 0.636246786632 |
| PAT   |  | <a href="https://pubchem.ncbi.nlm.nih.gov/compound/CHEMBL395933">CHEMBL395933</a><br><a href="https://pubchem.ncbi.nlm.nih.gov/compound/CHEMBL395933">. (https://pubchem.ncbi.nlm.nih.gov/compound/CHEMBL395933).</a><br>ki = 313.0 nM<br>simil = 0.880319148936 |
| PAIR  |  | <a href="https://pubchem.ncbi.nlm.nih.gov/compound/CHEMBL395933">CHEMBL395933</a><br><a href="https://pubchem.ncbi.nlm.nih.gov/compound/CHEMBL395933">. (https://pubchem.ncbi.nlm.nih.gov/compound/CHEMBL395933).</a><br>ki = 313.0 nM<br>simil = 0.709401709402 |
| TORS  |  | <a href="https://pubchem.ncbi.nlm.nih.gov/compound/CHEMBL395933">CHEMBL395933</a><br><a href="https://pubchem.ncbi.nlm.nih.gov/compound/CHEMBL395933">. (https://pubchem.ncbi.nlm.nih.gov/compound/CHEMBL395933).</a><br>ki = 313.0 nM<br>simil = 0.6875         |
| FP2   |  | <a href="https://pubchem.ncbi.nlm.nih.gov/compound/CHEMBL395933">CHEMBL395933</a><br><a href="https://pubchem.ncbi.nlm.nih.gov/compound/CHEMBL395933">. (https://pubchem.ncbi.nlm.nih.gov/compound/CHEMBL395933).</a><br>ki = 313.0 nM<br>simil = 0.67619047619  |



|       |                                                                                     |                                                                                                                                                                                        |
|-------|-------------------------------------------------------------------------------------|----------------------------------------------------------------------------------------------------------------------------------------------------------------------------------------|
| PUB   | 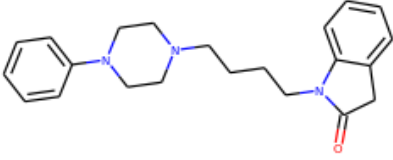   | <a href="https://pubchem.ncbi.nlm.nih.gov/compound/CHEMBL395933">. (https://pubchem.ncbi.nlm.nih.gov/compound/CHEMBL395933).</a><br>ki = 313.0 nM<br>simil = 0.906779661017            |
| MACCS |    | <a href="https://pubchem.ncbi.nlm.nih.gov/compound/CHEMBL395933">CHEMBL395933 (https://pubchem.ncbi.nlm.nih.gov/compound/CHEMBL395933).</a><br>ki = 313.0 nM<br>simil = 0.934782608696 |
| KR    |   | <a href="https://pubchem.ncbi.nlm.nih.gov/compound/CHEMBL395933">CHEMBL395933 (https://pubchem.ncbi.nlm.nih.gov/compound/CHEMBL395933).</a><br>ki = 313.0 nM<br>simil = 0.760563380282 |
| GRAPH |  | <a href="https://pubchem.ncbi.nlm.nih.gov/compound/CHEMBL240774">CHEMBL240774 (https://pubchem.ncbi.nlm.nih.gov/compound/CHEMBL240774).</a><br>ki = 80.0 nM<br>simil = 0.662790697674  |
| SUB   |  | <a href="https://pubchem.ncbi.nlm.nih.gov/compound/CHEMBL395933">CHEMBL395933 (https://pubchem.ncbi.nlm.nih.gov/compound/CHEMBL395933).</a><br>ki = 313.0 nM<br>simil = 1.0            |
| HYB   |  | <a href="https://pubchem.ncbi.nlm.nih.gov/compound/CHEMBL395933">CHEMBL395933 (https://pubchem.ncbi.nlm.nih.gov/compound/CHEMBL395933).</a><br>ki = 313.0 nM<br>simil = 0.611979166667 |

Mu opioid receptor: ki = N.A.00 nM Score = 7.6159

Best Fingerprints Similarity

|       |                                                                                     |                                                                                                                                                                                       |
|-------|-------------------------------------------------------------------------------------|---------------------------------------------------------------------------------------------------------------------------------------------------------------------------------------|
| ECFP2 | 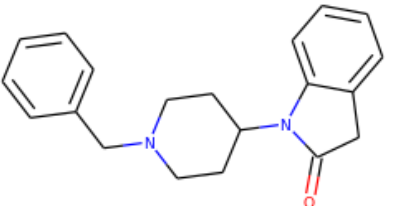 | <a href="https://pubchem.ncbi.nlm.nih.gov/compound/CHEMBL320874">CHEMBL320874 (https://pubchem.ncbi.nlm.nih.gov/compound/CHEMBL320874).</a><br>ki = 91.1 nM<br>simil = 0.518518518519 |
|-------|-------------------------------------------------------------------------------------|---------------------------------------------------------------------------------------------------------------------------------------------------------------------------------------|

|       |                                                                                     |                                                                                                                                                                                                      |
|-------|-------------------------------------------------------------------------------------|------------------------------------------------------------------------------------------------------------------------------------------------------------------------------------------------------|
| FCFP2 | 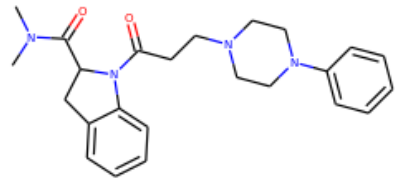   | <u>CHEMBL2064133</u><br>( <a href="https://pubchem.ncbi.nlm.nih.gov/compound/CHEMBL2064133">https://pubchem.ncbi.nlm.nih.gov/compound/CHEMBL2064133</a> )<br>ki = 397.0 nM<br>simil = 0.882352941176 |
| DAY   |    | <u>CHEMBL2387199</u><br>( <a href="https://pubchem.ncbi.nlm.nih.gov/compound/CHEMBL2387199">https://pubchem.ncbi.nlm.nih.gov/compound/CHEMBL2387199</a> )<br>ki = 46.97 nM<br>simil = 0.743918053777 |
| PAT   |   | <u>CHEMBL2387199</u><br>( <a href="https://pubchem.ncbi.nlm.nih.gov/compound/CHEMBL2387199">https://pubchem.ncbi.nlm.nih.gov/compound/CHEMBL2387199</a> )<br>ki = 46.97 nM<br>simil = 0.901069518717 |
| PAIR  |  | <u>CHEMBL101676</u><br>( <a href="https://pubchem.ncbi.nlm.nih.gov/compound/CHEMBL101676">https://pubchem.ncbi.nlm.nih.gov/compound/CHEMBL101676</a> )<br>ki = 38.9 nM<br>simil = 0.593984962406     |
| TORS  |  | <u>CHEMBL2387199</u><br>( <a href="https://pubchem.ncbi.nlm.nih.gov/compound/CHEMBL2387199">https://pubchem.ncbi.nlm.nih.gov/compound/CHEMBL2387199</a> )<br>ki = 46.97 nM<br>simil = 0.487179487179 |
| FP2   |  | <u>CHEMBL2387200</u><br>( <a href="https://pubchem.ncbi.nlm.nih.gov/compound/CHEMBL2387200">https://pubchem.ncbi.nlm.nih.gov/compound/CHEMBL2387200</a> )<br>ki = 23.27 nM<br>simil = 0.824742268041 |
| PUB   |  | <u>CHEMBL2387199</u><br>( <a href="https://pubchem.ncbi.nlm.nih.gov/compound/CHEMBL2387199">https://pubchem.ncbi.nlm.nih.gov/compound/CHEMBL2387199</a> )<br>ki = 46.97 nM<br>simil = 0.898305084746 |

|       |                                                                                     |                                                                                                                                                                                                      |
|-------|-------------------------------------------------------------------------------------|------------------------------------------------------------------------------------------------------------------------------------------------------------------------------------------------------|
| MACCS | 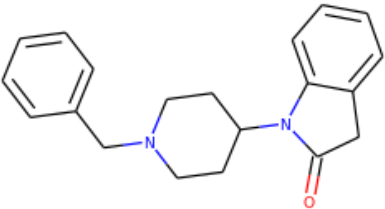   | <u>CHEMBL320874</u><br>( <a href="https://pubchem.ncbi.nlm.nih.gov/compound/CHEMBL320874">https://pubchem.ncbi.nlm.nih.gov/compound/CHEMBL320874</a> )<br>ki = 91.1 nM<br>simil = 0.934782608696     |
| KR    |    | <u>CHEMBL2064133</u><br>( <a href="https://pubchem.ncbi.nlm.nih.gov/compound/CHEMBL2064133">https://pubchem.ncbi.nlm.nih.gov/compound/CHEMBL2064133</a> )<br>ki = 397.0 nM<br>simil = 0.644444444444 |
| GRAPH |   | <u>CHEMBL2387198</u><br>( <a href="https://pubchem.ncbi.nlm.nih.gov/compound/CHEMBL2387198">https://pubchem.ncbi.nlm.nih.gov/compound/CHEMBL2387198</a> )<br>ki = 7.62 nM<br>simil = 0.864864864865  |
| SUB   |  | <u>CHEMBL2064133</u><br>( <a href="https://pubchem.ncbi.nlm.nih.gov/compound/CHEMBL2064133">https://pubchem.ncbi.nlm.nih.gov/compound/CHEMBL2064133</a> )<br>ki = 397.0 nM<br>simil = 0.923076923077 |
| HYB   |  | <u>CHEMBL2387198</u><br>( <a href="https://pubchem.ncbi.nlm.nih.gov/compound/CHEMBL2387198">https://pubchem.ncbi.nlm.nih.gov/compound/CHEMBL2387198</a> )<br>ki = 7.62 nM<br>simil = 0.792792792793  |

Nociceptin receptor: ki = 24.4983 nM Score = 7.6159

Best Fingerprints Similarity

|       |                                                                                     |                                                                                                                                                                                                      |
|-------|-------------------------------------------------------------------------------------|------------------------------------------------------------------------------------------------------------------------------------------------------------------------------------------------------|
| ECFP2 | 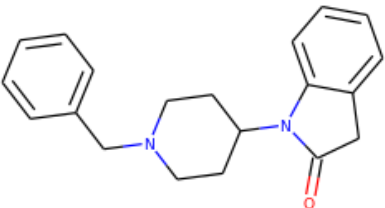 | <u>CHEMBL320874</u><br>( <a href="https://pubchem.ncbi.nlm.nih.gov/compound/CHEMBL320874">https://pubchem.ncbi.nlm.nih.gov/compound/CHEMBL320874</a> )<br>ki = 201.0 nM<br>simil = 0.518518518519    |
| FCFP2 |  | <u>CHEMBL2064133</u><br>( <a href="https://pubchem.ncbi.nlm.nih.gov/compound/CHEMBL2064133">https://pubchem.ncbi.nlm.nih.gov/compound/CHEMBL2064133</a> )<br>ki = 250.0 nM<br>simil = 0.882352941176 |

DAY

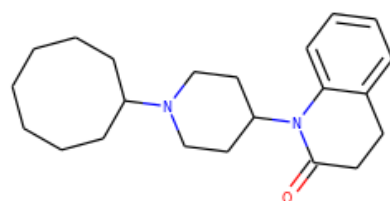

CHEMBL2387199  
(<https://pubchem.ncbi.nlm.nih.gov/compound/CHEMBL2387199>)  
ki = 18.66 nM  
simil = 0.743918053777

PAT

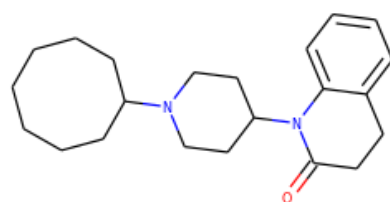

CHEMBL2387199  
(<https://pubchem.ncbi.nlm.nih.gov/compound/CHEMBL2387199>)  
ki = 18.66 nM  
simil = 0.901069518717

PAIR

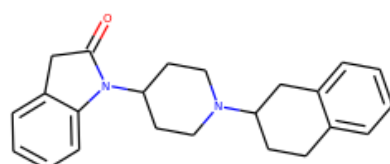

CHEMBL101676  
(<https://pubchem.ncbi.nlm.nih.gov/compound/CHEMBL101676>)  
ki = 29.3 nM  
simil = 0.593984962406

TORS



CHEMBL2387199  
(<https://pubchem.ncbi.nlm.nih.gov/compound/CHEMBL2387199>)  
ki = 18.66 nM  
simil = 0.487179487179

FP2

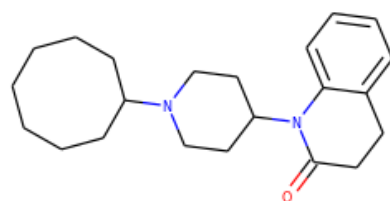

CHEMBL2387199  
(<https://pubchem.ncbi.nlm.nih.gov/compound/CHEMBL2387199>)  
ki = 18.66 nM  
simil = 0.824742268041

PUB

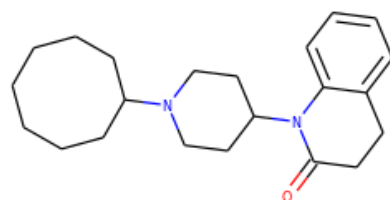

CHEMBL2387199  
(<https://pubchem.ncbi.nlm.nih.gov/compound/CHEMBL2387199>)  
ki = 18.66 nM  
simil = 0.898305084746

MACCS

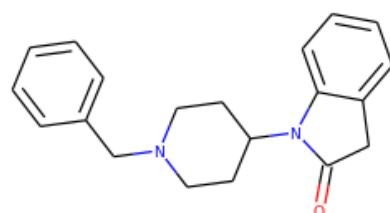

CHEMBL320874  
(<https://pubchem.ncbi.nlm.nih.gov/compound/CHEMBL320874>)  
ki = 201.0 nM  
simil = 0.934782608696

KR

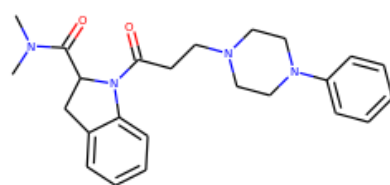

CHEMBL2064133

(<https://pubchem.ncbi.nlm.nih.gov/compound/CHEMBL2064133>)

ki = 250.0 nM

simil = 0.644444444444

GRAPH

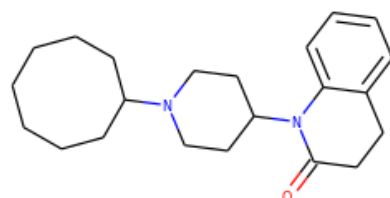

CHEMBL2387199

(<https://pubchem.ncbi.nlm.nih.gov/compound/CHEMBL2387199>)

ki = 18.66 nM

simil = 0.864864864865

SUB

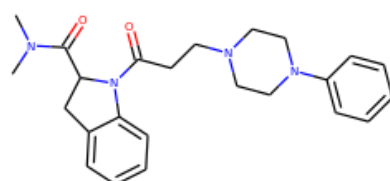

CHEMBL2064133

(<https://pubchem.ncbi.nlm.nih.gov/compound/CHEMBL2064133>)

ki = 250.0 nM

simil = 0.923076923077

HYB

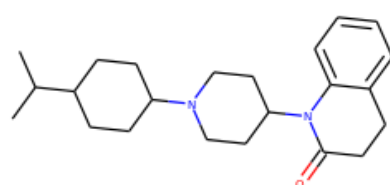

CHEMBL2387198

(<https://pubchem.ncbi.nlm.nih.gov/compound/CHEMBL2387198>)

ki = 20.4 nM

simil = 0.792792792793

Kappa opioid receptor: ki = 78.5391 nM Score = 7.5397

Best Fingerprints Similarity

ECFP2

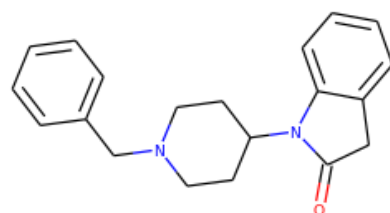

CHEMBL320874

(<https://pubchem.ncbi.nlm.nih.gov/compound/CHEMBL320874>)

ki = 84.5 nM

simil = 0.518518518519

FCFP2

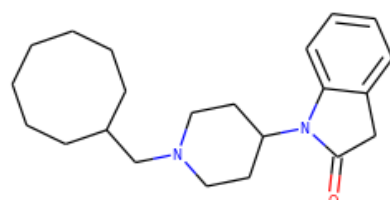

CHEMBL317152

(<https://pubchem.ncbi.nlm.nih.gov/compound/CHEMBL317152>)

ki = 229.0 nM

simil = 0.8125

DAY

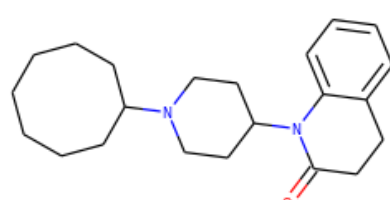

CHEMBL2387199

(<https://pubchem.ncbi.nlm.nih.gov/compound/CHEMBL2387199>)

ki = 37.92 nM

simil = 0.743918053777

|       |                                                                                     |                                                                                                                                                                                                                   |
|-------|-------------------------------------------------------------------------------------|-------------------------------------------------------------------------------------------------------------------------------------------------------------------------------------------------------------------|
| PAT   | 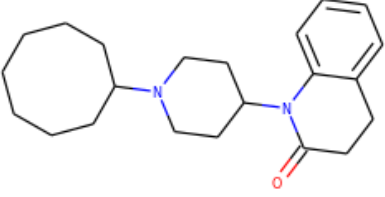   | <p><u>CHEMBL2387199</u><br/> <a href="https://pubchem.ncbi.nlm.nih.gov/compound/CHEMBL2387199">. (https://pubchem.ncbi.nlm.nih.gov/compound/CHEMBL2387199)</a><br/> ki = 37.92 nM<br/> simil = 0.901069518717</p> |
| PAIR  |    | <p><u>CHEMBL101676</u><br/> <a href="https://pubchem.ncbi.nlm.nih.gov/compound/CHEMBL101676">. (https://pubchem.ncbi.nlm.nih.gov/compound/CHEMBL101676)</a><br/> ki = 55.1 nM<br/> simil = 0.593984962406</p>     |
| TORS  |   | <p><u>CHEMBL2387199</u><br/> <a href="https://pubchem.ncbi.nlm.nih.gov/compound/CHEMBL2387199">. (https://pubchem.ncbi.nlm.nih.gov/compound/CHEMBL2387199)</a><br/> ki = 37.92 nM<br/> simil = 0.487179487179</p> |
| FP2   |  | <p><u>CHEMBL2387200</u><br/> <a href="https://pubchem.ncbi.nlm.nih.gov/compound/CHEMBL2387200">. (https://pubchem.ncbi.nlm.nih.gov/compound/CHEMBL2387200)</a><br/> ki = 27.69 nM<br/> simil = 0.824742268041</p> |
| PUB   |  | <p><u>CHEMBL2387199</u><br/> <a href="https://pubchem.ncbi.nlm.nih.gov/compound/CHEMBL2387199">. (https://pubchem.ncbi.nlm.nih.gov/compound/CHEMBL2387199)</a><br/> ki = 37.92 nM<br/> simil = 0.898305084746</p> |
| MACCS |  | <p><u>CHEMBL320874</u><br/> <a href="https://pubchem.ncbi.nlm.nih.gov/compound/CHEMBL320874">. (https://pubchem.ncbi.nlm.nih.gov/compound/CHEMBL320874)</a><br/> ki = 84.5 nM<br/> simil = 0.934782608696</p>     |
| KR    |  | <p><u>CHEMBL2387199</u><br/> <a href="https://pubchem.ncbi.nlm.nih.gov/compound/CHEMBL2387199">. (https://pubchem.ncbi.nlm.nih.gov/compound/CHEMBL2387199)</a><br/> ki = 37.92 nM<br/> simil = 0.546511627907</p> |
| GRAPH |                                                                                     | <p><u>CHEMBL2387200</u><br/> <a href="https://pubchem.ncbi.nlm.nih.gov/compound/CHEMBL2387200">. (https://pubchem.ncbi.nlm.nih.gov/compound/CHEMBL2387200)</a><br/> ki = 27.69 nM<br/> simil = 0.864864864865</p> |



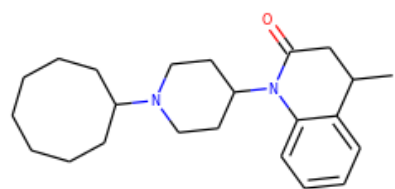

SUB

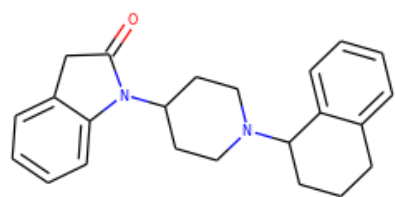

CHEMBL101118

(<https://pubchem.ncbi.nlm.nih.gov/compound/CHEMBL101118>)

ki = 21.5 nM

simil = 0.916666666667

HYB

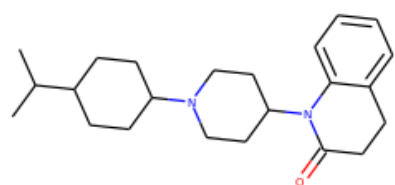

CHEMBL2387198

(<https://pubchem.ncbi.nlm.nih.gov/compound/CHEMBL2387198>)

ki = 70.04 nM

simil = 0.792792792793

Dopamine D4 receptor: ki = N.A.00 nM Score = 7.3618

Best Fingerprints Similarity

ECFP2

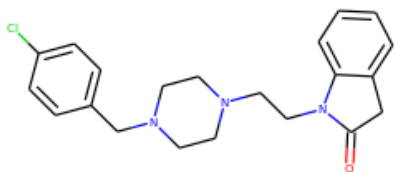

CHEMBL322326

(<https://pubchem.ncbi.nlm.nih.gov/compound/CHEMBL322326>)

ki = 8.0 nM

simil = 0.615384615385

FCFP2

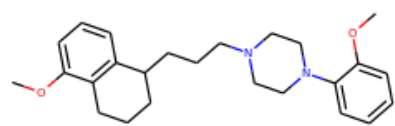

CHEMBL26929

(<https://pubchem.ncbi.nlm.nih.gov/compound/CHEMBL26929>)

ki = 37.0 nM

simil = 0.764705882353

DAY

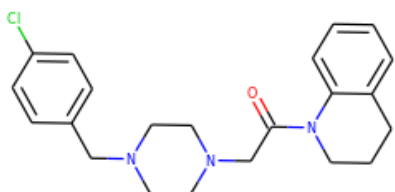

CHEMBL323537

(<https://pubchem.ncbi.nlm.nih.gov/compound/CHEMBL323537>)

ki = 47.0 nM

simil = 0.706329113924

PAT

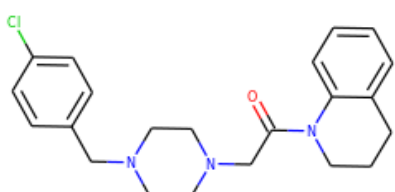

CHEMBL323537

(<https://pubchem.ncbi.nlm.nih.gov/compound/CHEMBL323537>)

ki = 47.0 nM

simil = 0.917553191489

|       |                                                                                     |                                                                                                                                                                                                                                                                  |
|-------|-------------------------------------------------------------------------------------|------------------------------------------------------------------------------------------------------------------------------------------------------------------------------------------------------------------------------------------------------------------|
| PAIR  | 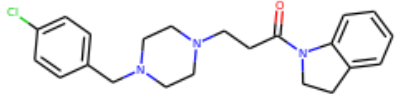   | <a href="https://pubchem.ncbi.nlm.nih.gov/compound/CHEMBL104498">CHEMBL104498</a><br>( <a href="https://pubchem.ncbi.nlm.nih.gov/compound/CHEMBL104498">https://pubchem.ncbi.nlm.nih.gov/compound/CHEMBL104498</a> )<br>ki = 726.0 nM<br>simil = 0.618055555556  |
|       |                                                                                     |                                                                                                                                                                                                                                                                  |
| TORS  |    | <a href="https://pubchem.ncbi.nlm.nih.gov/compound/CHEMBL104498">CHEMBL104498</a><br>( <a href="https://pubchem.ncbi.nlm.nih.gov/compound/CHEMBL104498">https://pubchem.ncbi.nlm.nih.gov/compound/CHEMBL104498</a> )<br>ki = 726.0 nM<br>simil = 0.78125         |
|       |                                                                                     |                                                                                                                                                                                                                                                                  |
| FP2   |   | <a href="https://pubchem.ncbi.nlm.nih.gov/compound/CHEMBL323537">CHEMBL323537</a><br>( <a href="https://pubchem.ncbi.nlm.nih.gov/compound/CHEMBL323537">https://pubchem.ncbi.nlm.nih.gov/compound/CHEMBL323537</a> )<br>ki = 47.0 nM<br>simil = 0.678260869565   |
|       |                                                                                     |                                                                                                                                                                                                                                                                  |
| PUB   |  | <a href="https://pubchem.ncbi.nlm.nih.gov/compound/CHEMBL302340">CHEMBL302340</a><br>( <a href="https://pubchem.ncbi.nlm.nih.gov/compound/CHEMBL302340">https://pubchem.ncbi.nlm.nih.gov/compound/CHEMBL302340</a> )<br>ki = 2960.0 nM<br>simil = 0.877049180328 |
|       |                                                                                     |                                                                                                                                                                                                                                                                  |
| MACCS |  | <a href="https://pubchem.ncbi.nlm.nih.gov/compound/CHEMBL314952">CHEMBL314952</a><br>( <a href="https://pubchem.ncbi.nlm.nih.gov/compound/CHEMBL314952">https://pubchem.ncbi.nlm.nih.gov/compound/CHEMBL314952</a> )<br>ki = 3.0 nM<br>simil = 0.877551020408    |
|       |                                                                                     |                                                                                                                                                                                                                                                                  |
| KR    |  | <a href="https://pubchem.ncbi.nlm.nih.gov/compound/CHEMBL302796">CHEMBL302796</a><br>( <a href="https://pubchem.ncbi.nlm.nih.gov/compound/CHEMBL302796">https://pubchem.ncbi.nlm.nih.gov/compound/CHEMBL302796</a> )<br>ki = 2170.0 nM<br>simil = 0.6375         |
|       |                                                                                     |                                                                                                                                                                                                                                                                  |
| GRAPH |  | <a href="https://pubchem.ncbi.nlm.nih.gov/compound/CHEMBL38262">CHEMBL38262</a><br>( <a href="https://pubchem.ncbi.nlm.nih.gov/compound/CHEMBL38262">https://pubchem.ncbi.nlm.nih.gov/compound/CHEMBL38262</a> )<br>ki = 8.8 nM<br>simil = 0.910256410256        |
|       |                                                                                     |                                                                                                                                                                                                                                                                  |

SUB

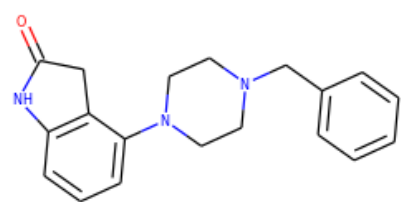

CHEMBL314952

(<https://pubchem.ncbi.nlm.nih.gov/compound/CHEMBL314952>)

ki = 3.0 nM

simil = 1.0

HYB

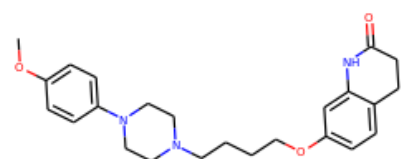

CHEMBL1813585

(<https://pubchem.ncbi.nlm.nih.gov/compound/CHEMBL1813585>)

ki = 359.0 nM

simil = 0.556354916067

Serotonin transporter: ki = N.A.00 nM Score = 6.369

Best Fingerprints Similarity

ECFP2

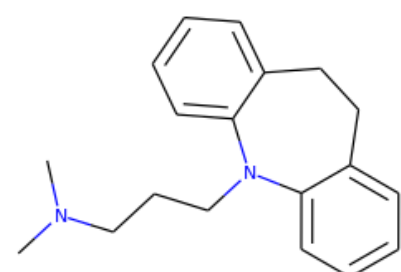

CHEMBL11 (<https://pubchem.ncbi.nlm.nih.gov/compound/CHEMBL11>)

ki = 0.52 nM

simil = 0.52

FCFP2

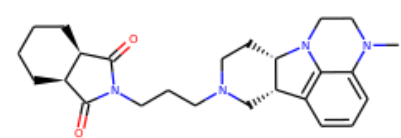

CHEMBL3233418

(<https://pubchem.ncbi.nlm.nih.gov/compound/CHEMBL3233418>)

ki = 1000.0 nM

simil = 0.777777777778

DAY

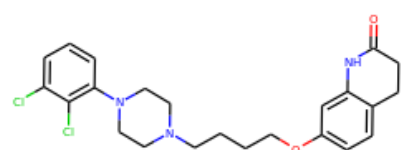

CHEMBL1112 (<https://pubchem.ncbi.nlm.nih.gov/compound/CHEMBL1112>)

ki = 31.62 nM

simil = 0.56

PAT

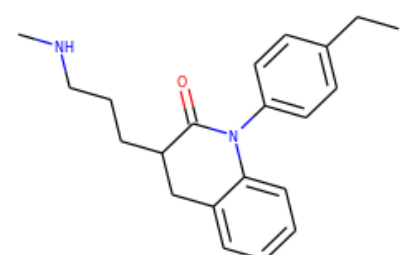

CHEMBL198038

(<https://pubchem.ncbi.nlm.nih.gov/compound/CHEMBL198038>)

ki = 100.0 nM

simil = 0.870026525199

PAIR

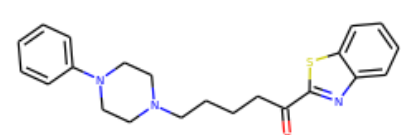

CHEMBL2037530

(<https://pubchem.ncbi.nlm.nih.gov/compound/CHEMBL2037530>)

ki = 298.0 nM

simil = 0.55033557047

|       |                                                                                     |                                                                                                                                                                                                   |
|-------|-------------------------------------------------------------------------------------|---------------------------------------------------------------------------------------------------------------------------------------------------------------------------------------------------|
| TORS  | 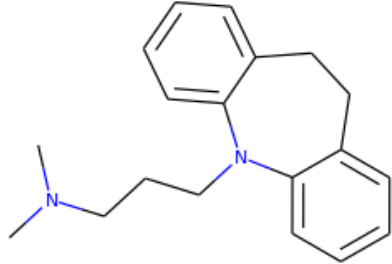    | <u>CHEMBL11</u> ( <a href="https://pubchem.ncbi.nlm.nih.gov/compound/CHEMBL11">https://pubchem.ncbi.nlm.nih.gov/compound/CHEMBL11</a> )<br>ki = 0.52 nM<br>simil = 0.642857142857                 |
| FP2   |    | <u>CHEMBL194310</u><br>( <a href="https://pubchem.ncbi.nlm.nih.gov/compound/CHEMBL194310">https://pubchem.ncbi.nlm.nih.gov/compound/CHEMBL194310</a> )<br>ki = 100.0 nM<br>simil = 0.62037037037  |
| PUB   |   | <u>CHEMBL196365</u><br>( <a href="https://pubchem.ncbi.nlm.nih.gov/compound/CHEMBL196365">https://pubchem.ncbi.nlm.nih.gov/compound/CHEMBL196365</a> )<br>ki = 100.0 nM<br>simil = 0.868852459016 |
| MACCS |  | <u>CHEMBL1290487</u><br>( <a href="https://pubchem.ncbi.nlm.nih.gov/compound/CHEMBL1290487">https://pubchem.ncbi.nlm.nih.gov/compound/CHEMBL1290487</a> )<br>ki = 12.59 nM<br>simil = 0.88        |
| KR    |  | <u>CHEMBL1290487</u><br>( <a href="https://pubchem.ncbi.nlm.nih.gov/compound/CHEMBL1290487">https://pubchem.ncbi.nlm.nih.gov/compound/CHEMBL1290487</a> )<br>ki = 12.59 nM<br>simil = 0.64        |
| GRAPH |  | <u>CHEMBL1289618</u><br>( <a href="https://pubchem.ncbi.nlm.nih.gov/compound/CHEMBL1289618">https://pubchem.ncbi.nlm.nih.gov/compound/CHEMBL1289618</a> )<br>ki = 0.2512 nM<br>simil = 0.8625     |
| SUB   |  | <u>CHEMBL11</u> ( <a href="https://pubchem.ncbi.nlm.nih.gov/compound/CHEMBL11">https://pubchem.ncbi.nlm.nih.gov/compound/CHEMBL11</a> )<br>ki = 0.52 nM<br>simil = 0.916666666667                 |
| HYB   |                                                                                     | <u>CHEMBL89245</u><br>( <a href="https://pubchem.ncbi.nlm.nih.gov/compound/CHEMBL89245">https://pubchem.ncbi.nlm.nih.gov/compound/CHEMBL89245</a> )<br>ki = 251.19 nM<br>simil = 0.654596100279   |

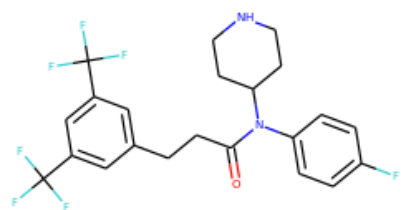

Sigma opioid receptor:  $k_i$  = N.A.00 nM Score = 6.175

### Best Fingerprints Similarity

|       |                                                                                     |                                                                                                                                                                                                                           |
|-------|-------------------------------------------------------------------------------------|---------------------------------------------------------------------------------------------------------------------------------------------------------------------------------------------------------------------------|
| ECFP2 | 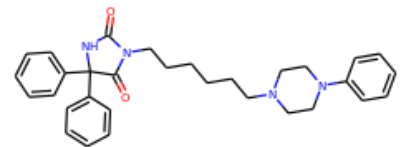   | <p><u>CHEMBL71104</u><br/> <a href="https://pubchem.ncbi.nlm.nih.gov/compound/CHEMBL71104">. (https://pubchem.ncbi.nlm.nih.gov/compound/CHEMBL71104)</a><br/> <math>k_i</math> = 11.0 nM<br/> simil = 0.615384615385</p>  |
| FCFP2 |  | <p><u>CHEMBL85879</u><br/> <a href="https://pubchem.ncbi.nlm.nih.gov/compound/CHEMBL85879">. (https://pubchem.ncbi.nlm.nih.gov/compound/CHEMBL85879)</a><br/> <math>k_i</math> = 2.6 nM<br/> simil = 0.8</p>              |
| DAY   |  | <p><u>CHEMBL111896</u><br/> <a href="https://pubchem.ncbi.nlm.nih.gov/compound/CHEMBL111896">. (https://pubchem.ncbi.nlm.nih.gov/compound/CHEMBL111896)</a><br/> <math>k_i</math> = 6.7 nM<br/> simil = 0.48188976378</p> |
| PAT   |  | <p><u>CHEMBL19985</u><br/> <a href="https://pubchem.ncbi.nlm.nih.gov/compound/CHEMBL19985">. (https://pubchem.ncbi.nlm.nih.gov/compound/CHEMBL19985)</a><br/> <math>k_i</math> = 30.0 nM<br/> simil = 0.804347826087</p>  |
| PAIR  |  | <p><u>CHEMBL19351</u><br/> <a href="https://pubchem.ncbi.nlm.nih.gov/compound/CHEMBL19351">. (https://pubchem.ncbi.nlm.nih.gov/compound/CHEMBL19351)</a><br/> <math>k_i</math> = 125.0 nM<br/> simil = 0.706422018349</p> |
| TORS  |  | <p><u>CHEMBL415</u> <a href="https://pubchem.ncbi.nlm.nih.gov/compound/CHEMBL415">. (https://pubchem.ncbi.nlm.nih.gov/compound/CHEMBL415)</a><br/> <math>k_i</math> = 572.0 nM<br/> simil = 0.558823529412</p>            |

FP2

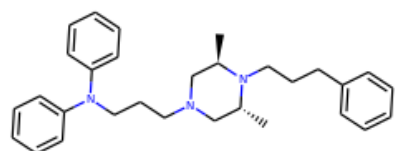

CHEMBL316244

(<https://pubchem.ncbi.nlm.nih.gov/compound/CHEMBL316244>)

ki = 97.2 nM

simil = 0.648936170213

PUB

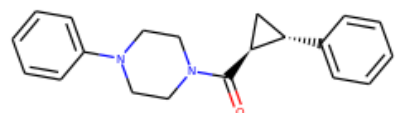

CHEMBL3218990

(<https://pubchem.ncbi.nlm.nih.gov/compound/CHEMBL3218990>)

ki = 1258.93 nM

simil = 0.889830508475

MACCS

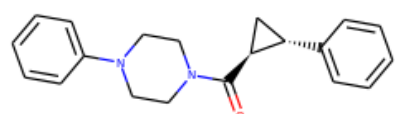

CHEMBL3218990

(<https://pubchem.ncbi.nlm.nih.gov/compound/CHEMBL3218990>)

ki = 1258.93 nM

simil = 0.863636363636

KR

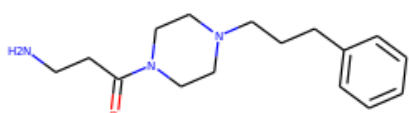

CHEMBL356738

(<https://pubchem.ncbi.nlm.nih.gov/compound/CHEMBL356738>)

ki = 148.0 nM

simil = 0.64

GRAPH

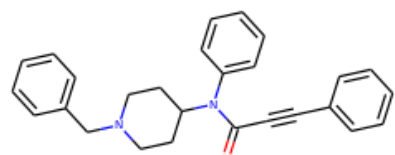

CHEMBL112170

(<https://pubchem.ncbi.nlm.nih.gov/compound/CHEMBL112170>)

ki = 6.0 nM

simil = 0.824324324324

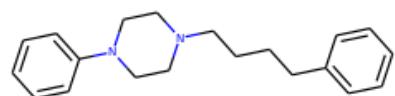

SUB

CHEMBL85879

(<https://pubchem.ncbi.nlm.nih.gov/compound/CHEMBL85879>)

ki = 2.6 nM

simil = 0.916666666667

HYB

CHEMBL302021

(<https://pubchem.ncbi.nlm.nih.gov/compound/CHEMBL302021>)

ki = 4000.0 nM

simil = 0.447311827957



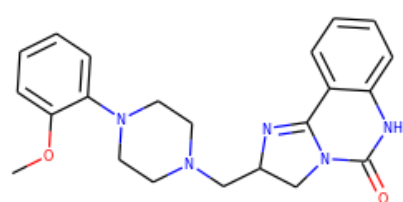

Serotonin 2c (5-HT2c) receptor:  $k_i$  = N.A.00 nM Score = 5.5387

### Best Fingerprints Similarity

ECFP2

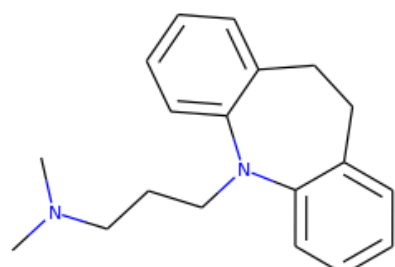

CHEMBL11 (<https://pubchem.ncbi.nlm.nih.gov/compound/CHEMBL11>)

$k_i$  = 160.0 nM

simil = 0.52

FCFP2

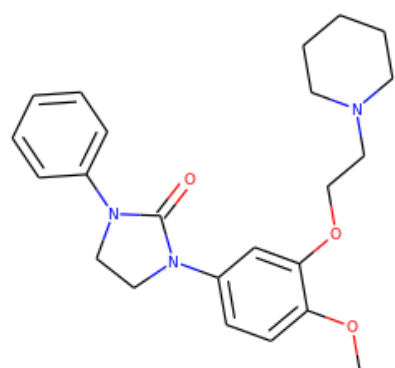

CHEMBL383800

(<https://pubchem.ncbi.nlm.nih.gov/compound/CHEMBL383800>)

$k_i$  = 1.259 nM

simil = 0.823529411765

DAY

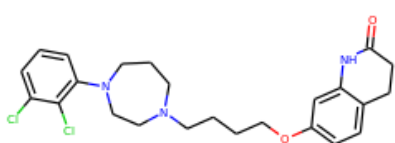

CHEMBL2165126

(<https://pubchem.ncbi.nlm.nih.gov/compound/CHEMBL2165126>)

$k_i$  = 0.6 nM

simil = 0.575824175824

PAT

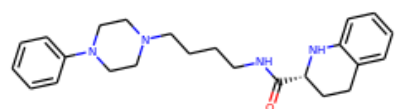

CHEMBL3358505

(<https://pubchem.ncbi.nlm.nih.gov/compound/CHEMBL3358505>)

$k_i$  = 1000.0 nM

simil = 0.886243386243

PAIR

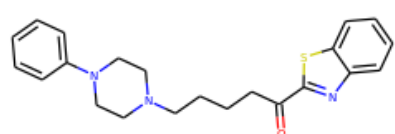

CHEMBL2037530

(<https://pubchem.ncbi.nlm.nih.gov/compound/CHEMBL2037530>)

$k_i$  = 2140.0 nM

simil = 0.55033557047

TORS

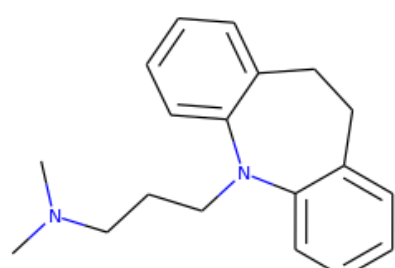

CHEMBL11 (<https://pubchem.ncbi.nlm.nih.gov/compound/CHEMBL11>)

$k_i$  = 160.0 nM

simil = 0.642857142857

FP2

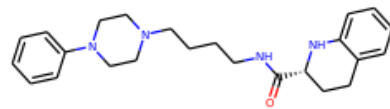

CHEMBL3358505  
(<https://pubchem.ncbi.nlm.nih.gov/compound/CHEMBL3358505>)  
ki = 1000.0 nM  
simil = 0.694444444444

PUB

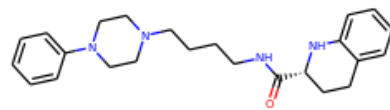

CHEMBL3358505  
(<https://pubchem.ncbi.nlm.nih.gov/compound/CHEMBL3358505>)  
ki = 1000.0 nM  
simil = 0.870967741935

MACCS

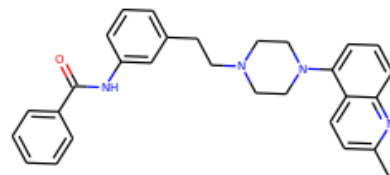

CHEMBL1632210  
(<https://pubchem.ncbi.nlm.nih.gov/compound/CHEMBL1632210>)  
ki = 794.33 nM  
simil = 0.8125

KR

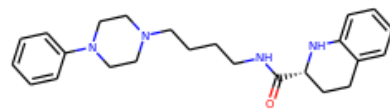

CHEMBL3358505  
(<https://pubchem.ncbi.nlm.nih.gov/compound/CHEMBL3358505>)  
ki = 1000.0 nM  
simil = 0.612903225806

GRAPH

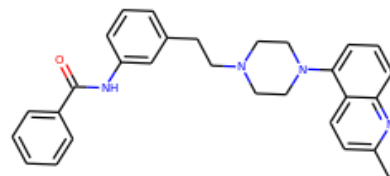

CHEMBL1632210  
(<https://pubchem.ncbi.nlm.nih.gov/compound/CHEMBL1632210>)  
ki = 794.33 nM  
simil = 0.848101265823

SUB

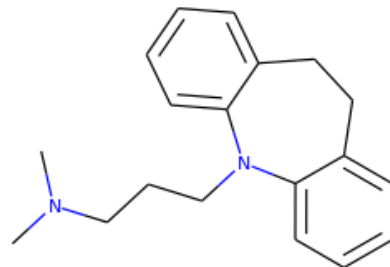

CHEMBL11 (<https://pubchem.ncbi.nlm.nih.gov/compound/CHEMBL11>)  
ki = 160.0 nM  
simil = 0.916666666667

HYB

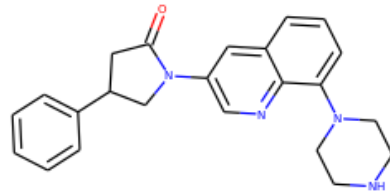

CHEMBL3260795  
(<https://pubchem.ncbi.nlm.nih.gov/compound/CHEMBL3260795>)  
ki = 30000.0 nM  
simil = 0.524945770065

Alpha-1d adrenergic receptor: ki = N.A.00 nM Score = 5.1392

Best Fingerprints Similarity

|       |                                                                                     |                                                                                                                                                                                                       |
|-------|-------------------------------------------------------------------------------------|-------------------------------------------------------------------------------------------------------------------------------------------------------------------------------------------------------|
| ECFP2 | 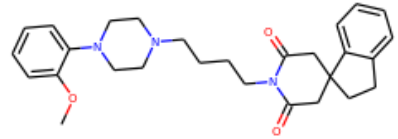   | <u>CHEMBL1796050</u><br>( <a href="https://pubchem.ncbi.nlm.nih.gov/compound/CHEMBL1796050">https://pubchem.ncbi.nlm.nih.gov/compound/CHEMBL1796050</a> )<br>ki = 16.22 nM<br>simil = 0.633333333333  |
| FCFP2 |    | <u>CHEMBL1796033</u><br>( <a href="https://pubchem.ncbi.nlm.nih.gov/compound/CHEMBL1796033">https://pubchem.ncbi.nlm.nih.gov/compound/CHEMBL1796033</a> )<br>ki = 15.85 nM<br>simil = 0.777777777778  |
| DAY   |    | <u>CHEMBL1796031</u><br>( <a href="https://pubchem.ncbi.nlm.nih.gov/compound/CHEMBL1796031">https://pubchem.ncbi.nlm.nih.gov/compound/CHEMBL1796031</a> )<br>ki = 43.65 nM<br>simil = 0.503052503053  |
| PAT   |  | <u>CHEMBL1242923</u><br>( <a href="https://pubchem.ncbi.nlm.nih.gov/compound/CHEMBL1242923">https://pubchem.ncbi.nlm.nih.gov/compound/CHEMBL1242923</a> )<br>ki = 1000.0 nM<br>simil = 0.780952380952 |
| PAIR  |  | <u>CHEMBL1796031</u><br>( <a href="https://pubchem.ncbi.nlm.nih.gov/compound/CHEMBL1796031">https://pubchem.ncbi.nlm.nih.gov/compound/CHEMBL1796031</a> )<br>ki = 43.65 nM<br>simil = 0.5625          |
| TORS  |  | <u>CHEMBL415</u> ( <a href="https://pubchem.ncbi.nlm.nih.gov/compound/CHEMBL415">https://pubchem.ncbi.nlm.nih.gov/compound/CHEMBL415</a> )<br>ki = 88.0 nM<br>simil = 0.558823529412                  |
| FP2   |  | <u>CHEMBL1796031</u><br>( <a href="https://pubchem.ncbi.nlm.nih.gov/compound/CHEMBL1796031">https://pubchem.ncbi.nlm.nih.gov/compound/CHEMBL1796031</a> )<br>ki = 43.65 nM<br>simil = 0.654545454545  |

PUB

ki = 36.0 nM  
simil = 0.858267716535

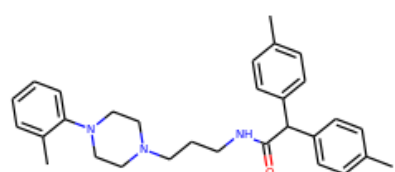

MACCS

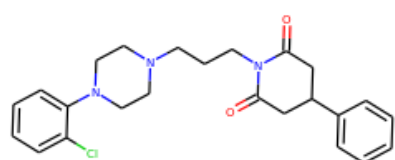

CHEMBL1796031  
(<https://pubchem.ncbi.nlm.nih.gov/compound/CHEMBL1796031>).  
ki = 43.65 nM  
simil = 0.843137254902

KR

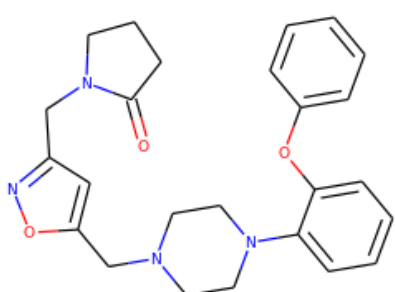

CHEMBL80109  
(<https://pubchem.ncbi.nlm.nih.gov/compound/CHEMBL80109>).  
ki = 34.5 nM  
simil = 0.6125

GRAPH

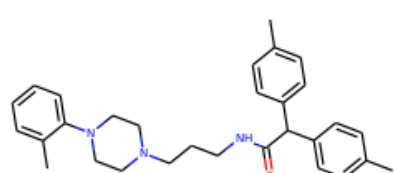

CHEMBL415887  
(<https://pubchem.ncbi.nlm.nih.gov/compound/CHEMBL415887>).  
ki = 36.0 nM  
simil = 0.905405405405

SUB

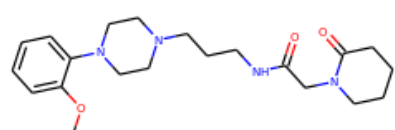

CHEMBL12501  
(<https://pubchem.ncbi.nlm.nih.gov/compound/CHEMBL12501>).  
ki = 10000.0 nM  
simil = 0.857142857143

HYB

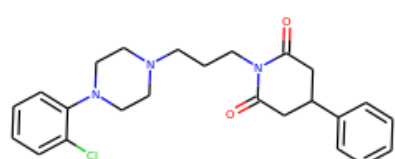

CHEMBL1796031  
(<https://pubchem.ncbi.nlm.nih.gov/compound/CHEMBL1796031>).  
ki = 43.65 nM  
simil = 0.607242339833

Delta opioid receptor: ki = 10342.6454 nM Score = 4.8099

Best Fingerprints Similarity

ECFP2

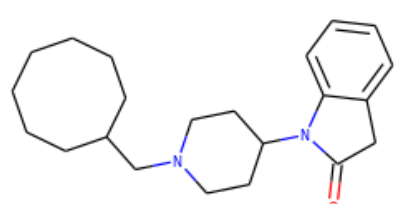

CHEMBL317152  
(<https://pubchem.ncbi.nlm.nih.gov/compound/CHEMBL317152>).  
ki = 10000.0 nM  
simil = 0.5

|       |                                                                                     |                                                                                                                                                                                                        |
|-------|-------------------------------------------------------------------------------------|--------------------------------------------------------------------------------------------------------------------------------------------------------------------------------------------------------|
| FCFP2 | 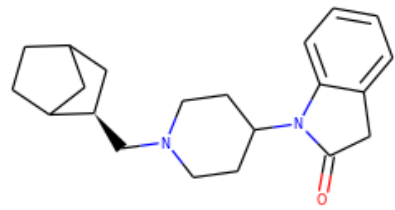   | <u>CHEMBL2111608</u><br>( <a href="https://pubchem.ncbi.nlm.nih.gov/compound/CHEMBL2111608">https://pubchem.ncbi.nlm.nih.gov/compound/CHEMBL2111608</a> )<br>ki = 10000.0 nM<br>simil = 0.8125         |
| DAY   |    | <u>CHEMBL3104104</u><br>( <a href="https://pubchem.ncbi.nlm.nih.gov/compound/CHEMBL3104104">https://pubchem.ncbi.nlm.nih.gov/compound/CHEMBL3104104</a> )<br>ki = 33.0 nM<br>simil = 0.654929577465    |
| PAT   |   | <u>CHEMBL3104104</u><br>( <a href="https://pubchem.ncbi.nlm.nih.gov/compound/CHEMBL3104104">https://pubchem.ncbi.nlm.nih.gov/compound/CHEMBL3104104</a> )<br>ki = 33.0 nM<br>simil = 0.825             |
| PAIR  |  | <u>CHEMBL2387334</u><br>( <a href="https://pubchem.ncbi.nlm.nih.gov/compound/CHEMBL2387334">https://pubchem.ncbi.nlm.nih.gov/compound/CHEMBL2387334</a> )<br>ki = 13000.0 nM<br>simil = 0.564417177914 |
| TORS  |  | <u>CHEMBL3104104</u><br>( <a href="https://pubchem.ncbi.nlm.nih.gov/compound/CHEMBL3104104">https://pubchem.ncbi.nlm.nih.gov/compound/CHEMBL3104104</a> )<br>ki = 33.0 nM<br>simil = 0.431818181818    |
| FP2   |  | <u>CHEMBL3104104</u><br>( <a href="https://pubchem.ncbi.nlm.nih.gov/compound/CHEMBL3104104">https://pubchem.ncbi.nlm.nih.gov/compound/CHEMBL3104104</a> )<br>ki = 33.0 nM<br>simil = 0.727272727273    |
| PUB   |  | <u>CHEMBL231352</u><br>( <a href="https://pubchem.ncbi.nlm.nih.gov/compound/CHEMBL231352">https://pubchem.ncbi.nlm.nih.gov/compound/CHEMBL231352</a> )<br>ki = 6900.0 nM<br>simil = 0.876033057851     |

|       |                                                                                     |                                                                                                                                                                                                        |
|-------|-------------------------------------------------------------------------------------|--------------------------------------------------------------------------------------------------------------------------------------------------------------------------------------------------------|
| MACCS | 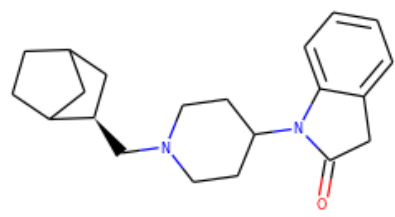   | <u>CHEMBL2111608</u><br>( <a href="https://pubchem.ncbi.nlm.nih.gov/compound/CHEMBL2111608">https://pubchem.ncbi.nlm.nih.gov/compound/CHEMBL2111608</a> )<br>ki = 10000.0 nM<br>simil = 0.913043478261 |
| KR    |    | <u>CHEMBL596</u> ( <a href="https://pubchem.ncbi.nlm.nih.gov/compound/CHEMBL596">https://pubchem.ncbi.nlm.nih.gov/compound/CHEMBL596</a> )<br>ki = 570.0 nM<br>simil = 0.517647058824                  |
| GRAPH |   | <u>CHEMBL2387334</u><br>( <a href="https://pubchem.ncbi.nlm.nih.gov/compound/CHEMBL2387334">https://pubchem.ncbi.nlm.nih.gov/compound/CHEMBL2387334</a> )<br>ki = 13000.0 nM<br>simil = 0.795454545455 |
| SUB   |  | <u>CHEMBL3665425</u><br>( <a href="https://pubchem.ncbi.nlm.nih.gov/compound/CHEMBL3665425">https://pubchem.ncbi.nlm.nih.gov/compound/CHEMBL3665425</a> )<br>ki = 16200.0 nM<br>simil = 0.916666666667 |
| HYB   |  | <u>CHEMBL389109</u><br>( <a href="https://pubchem.ncbi.nlm.nih.gov/compound/CHEMBL389109">https://pubchem.ncbi.nlm.nih.gov/compound/CHEMBL389109</a> )<br>ki = 12000.0 nM<br>simil = 0.606060606061    |

Histamine H3 receptor: ki = N.A.00 nM Score = 4.7234

#### Best Fingerprints Similarity

|       |                                                                                     |                                                                                                                                                                                                     |
|-------|-------------------------------------------------------------------------------------|-----------------------------------------------------------------------------------------------------------------------------------------------------------------------------------------------------|
| ECFP2 | 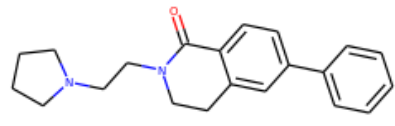 | <u>CHEMBL2031742</u><br>( <a href="https://pubchem.ncbi.nlm.nih.gov/compound/CHEMBL2031742">https://pubchem.ncbi.nlm.nih.gov/compound/CHEMBL2031742</a> )<br>ki = 11.4 nM<br>simil = 0.538461538462 |
| FCFP2 |  | <u>CHEMBL1824229</u><br>( <a href="https://pubchem.ncbi.nlm.nih.gov/compound/CHEMBL1824229">https://pubchem.ncbi.nlm.nih.gov/compound/CHEMBL1824229</a> )<br>ki = 1.7 nM<br>simil = 0.875           |



DAY

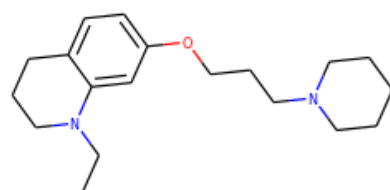

CHEMBL210761

(<https://pubchem.ncbi.nlm.nih.gov/compound/CHEMBL210761>)

ki = 156.0 nM

simil = 0.526381909548

PAT

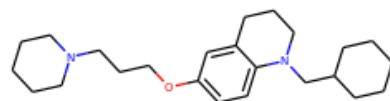

CHEMBL210252

(<https://pubchem.ncbi.nlm.nih.gov/compound/CHEMBL210252>)

ki = 31.0 nM

simil = 0.851063829787

PAIR

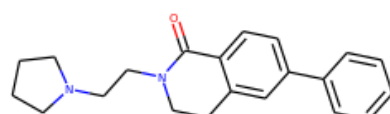

CHEMBL2031742

(<https://pubchem.ncbi.nlm.nih.gov/compound/CHEMBL2031742>)

ki = 11.4 nM

simil = 0.55737704918

TORS

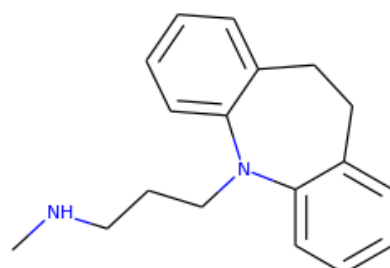

CHEMBL72 (<https://pubchem.ncbi.nlm.nih.gov/compound/CHEMBL72>)

ki = 5000.0 nM

simil = 0.620689655172

FP2

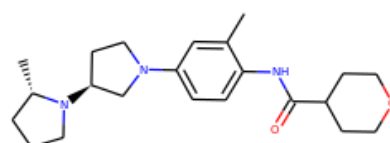

CHEMBL2441636

(<https://pubchem.ncbi.nlm.nih.gov/compound/CHEMBL2441636>)

ki = 1.0 nM

simil = 0.591304347826

PUB

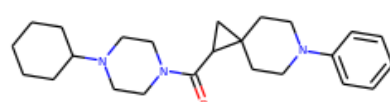

CHEMBL3127668

(<https://pubchem.ncbi.nlm.nih.gov/compound/CHEMBL3127668>)

ki = 1670.0 nM

simil = 0.827868852459

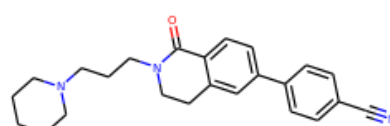

CHEMBL2031756

(<https://pubchem.ncbi.nlm.nih.gov/compound/CHEMBL2031756>)

ki = 18.0 nM

simil = 0.888888888889

MACCS

KR

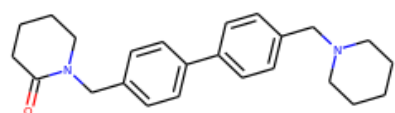

CHEMBL211370  
(<https://pubchem.ncbi.nlm.nih.gov/compound/CHEMBL211370>)  
ki = 46.77 nM  
simil = 0.470588235294

GRAPH

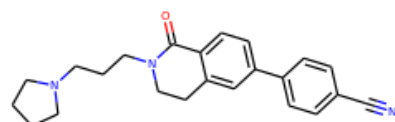

CHEMBL2031755  
(<https://pubchem.ncbi.nlm.nih.gov/compound/CHEMBL2031755>)  
ki = 6.9 nM  
simil = 0.864864864865

SUB



CHEMBL211370  
(<https://pubchem.ncbi.nlm.nih.gov/compound/CHEMBL211370>)  
ki = 46.77 nM  
simil = 0.916666666667

HYB

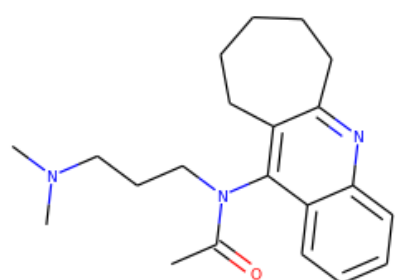

CHEMBL67518  
(<https://pubchem.ncbi.nlm.nih.gov/compound/CHEMBL67518>)  
ki = 1000.0 nM  
simil = 0.483801295896

Alpha-1b adrenergic receptor: ki = N.A.00 nM Score = 4.6328

Best Fingerprints Similarity

ECFP2

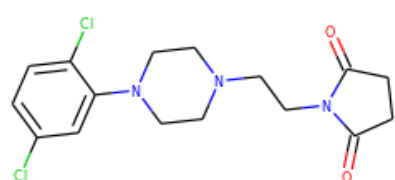

CHEMBL294646  
(<https://pubchem.ncbi.nlm.nih.gov/compound/CHEMBL294646>)  
ki = 86.38 nM  
simil = 0.64

FCFP2

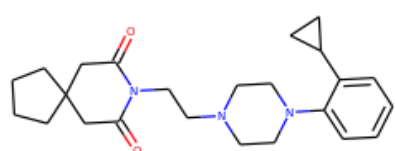

CHEMBL56804  
(<https://pubchem.ncbi.nlm.nih.gov/compound/CHEMBL56804>)  
ki = 35.56 nM  
simil = 0.823529411765

DAY

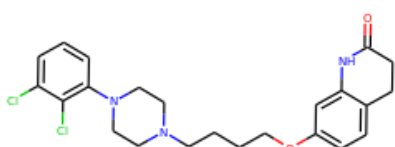

CHEMBL1112 (<https://pubchem.ncbi.nlm.nih.gov/compound/CHEMBL1112>)  
ki = 100.0 nM  
simil = 0.56

|       |                                                                                     |                                                                                                                                                                                                                  |
|-------|-------------------------------------------------------------------------------------|------------------------------------------------------------------------------------------------------------------------------------------------------------------------------------------------------------------|
| PAT   | 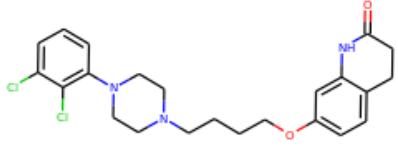   | <p><u>CHEMBL1112</u> (<a href="https://pubchem.ncbi.nlm.nih.gov/compound/CHEMBL1112">https://pubchem.ncbi.nlm.nih.gov/compound/CHEMBL1112</a>).</p> <p>ki = 100.0 nM<br/>simil = 0.82380952381</p>               |
| PAIR  |    | <p><u>CHEMBL1796031</u><br/>(<a href="https://pubchem.ncbi.nlm.nih.gov/compound/CHEMBL1796031">https://pubchem.ncbi.nlm.nih.gov/compound/CHEMBL1796031</a>).</p> <p>ki = 112.2 nM<br/>simil = 0.5625</p>         |
| TORS  |    | <p><u>CHEMBL1796031</u><br/>(<a href="https://pubchem.ncbi.nlm.nih.gov/compound/CHEMBL1796031">https://pubchem.ncbi.nlm.nih.gov/compound/CHEMBL1796031</a>).</p> <p>ki = 112.2 nM<br/>simil = 0.472222222222</p> |
| FP2   |  | <p><u>CHEMBL1796031</u><br/>(<a href="https://pubchem.ncbi.nlm.nih.gov/compound/CHEMBL1796031">https://pubchem.ncbi.nlm.nih.gov/compound/CHEMBL1796031</a>).</p> <p>ki = 112.2 nM<br/>simil = 0.654545454545</p> |
| PUB   |  | <p><u>CHEMBL415887</u><br/>(<a href="https://pubchem.ncbi.nlm.nih.gov/compound/CHEMBL415887">https://pubchem.ncbi.nlm.nih.gov/compound/CHEMBL415887</a>).</p> <p>ki = 6.6 nM<br/>simil = 0.858267716535</p>      |
| MACCS |  | <p><u>CHEMBL299022</u><br/>(<a href="https://pubchem.ncbi.nlm.nih.gov/compound/CHEMBL299022">https://pubchem.ncbi.nlm.nih.gov/compound/CHEMBL299022</a>).</p> <p>ki = 46.18 nM<br/>simil = 0.843137254902</p>    |
| KR    |  | <p><u>CHEMBL80109</u><br/>(<a href="https://pubchem.ncbi.nlm.nih.gov/compound/CHEMBL80109">https://pubchem.ncbi.nlm.nih.gov/compound/CHEMBL80109</a>).</p> <p>ki = 5000.0 nM<br/>simil = 0.6125</p>              |
| GRAPH |                                                                                     | <p><u>CHEMBL415887</u><br/>(<a href="https://pubchem.ncbi.nlm.nih.gov/compound/CHEMBL415887">https://pubchem.ncbi.nlm.nih.gov/compound/CHEMBL415887</a>).</p> <p>ki = 6.6 nM<br/>simil = 0.905405405405</p>      |

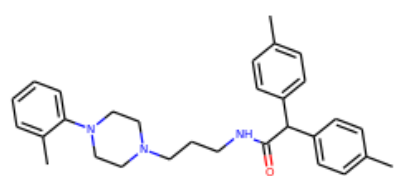

SUB

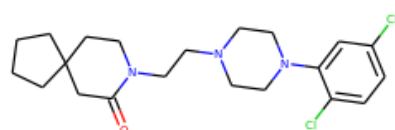

CHEMBL301224  
(<https://pubchem.ncbi.nlm.nih.gov/compound/CHEMBL301224>)  
ki = 7.95 nM  
simil = 0.857142857143

HYB

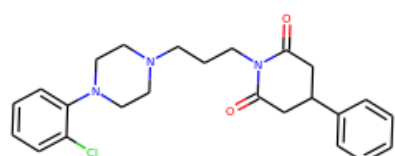

CHEMBL1796031  
(<https://pubchem.ncbi.nlm.nih.gov/compound/CHEMBL1796031>)  
ki = 112.2 nM  
simil = 0.607242339833

Alpha-1a adrenergic receptor: ki = N.A.00 nM Score = 4.587

Best Fingerprints Similarity

ECFP2

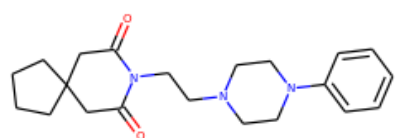

CHEMBL293968  
(<https://pubchem.ncbi.nlm.nih.gov/compound/CHEMBL293968>)  
ki = 2684.0 nM  
simil = 0.64

FCFP2

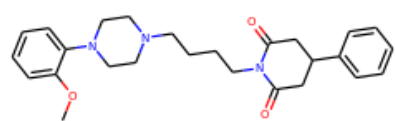

CHEMBL1796033  
(<https://pubchem.ncbi.nlm.nih.gov/compound/CHEMBL1796033>)  
ki = 1.82 nM  
simil = 0.777777777778

DAY

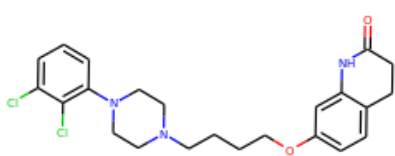

CHEMBL1112 (<https://pubchem.ncbi.nlm.nih.gov/compound/CHEMBL1112>)  
ki = 26.0 nM  
simil = 0.56

PAT

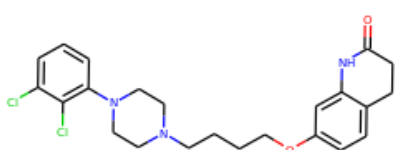

CHEMBL1112 (<https://pubchem.ncbi.nlm.nih.gov/compound/CHEMBL1112>)  
ki = 26.0 nM  
simil = 0.82380952381

PAIR

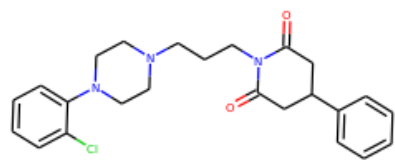

CHEMBL1796031  
(<https://pubchem.ncbi.nlm.nih.gov/compound/CHEMBL1796031>)  
ki = 47.86 nM  
simil = 0.5625

TORS

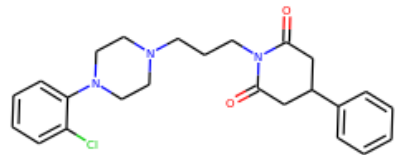

CHEMBL1796031  
(<https://pubchem.ncbi.nlm.nih.gov/compound/CHEMBL1796031>)  
ki = 47.86 nM  
simil = 0.4722222222

FP2

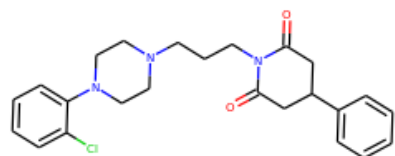

CHEMBL1796031  
(<https://pubchem.ncbi.nlm.nih.gov/compound/CHEMBL1796031>)  
ki = 47.86 nM  
simil = 0.6545454545

PUB

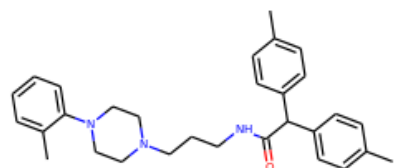

CHEMBL415887  
(<https://pubchem.ncbi.nlm.nih.gov/compound/CHEMBL415887>)  
ki = 1.1 nM  
simil = 0.858267716535

MACCS

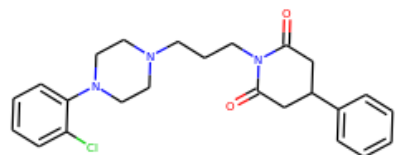

CHEMBL1796031  
(<https://pubchem.ncbi.nlm.nih.gov/compound/CHEMBL1796031>)  
ki = 47.86 nM  
simil = 0.843137254902

KR

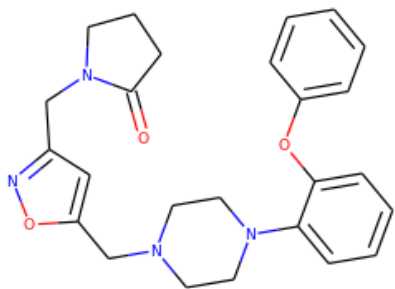

CHEMBL80109  
(<https://pubchem.ncbi.nlm.nih.gov/compound/CHEMBL80109>)  
ki = 28.0 nM  
simil = 0.6125

GRAPH

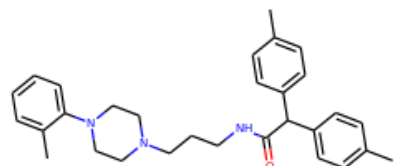

CHEMBL415887  
(<https://pubchem.ncbi.nlm.nih.gov/compound/CHEMBL415887>)  
ki = 1.1 nM  
simil = 0.905405405405

SUB 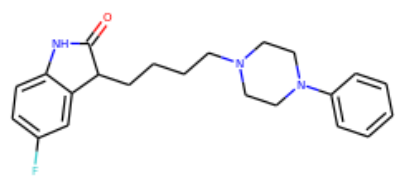 [CHEMBL411663](https://pubchem.ncbi.nlm.nih.gov/compound/CHEMBL411663)  
(<https://pubchem.ncbi.nlm.nih.gov/compound/CHEMBL411663>)  
ki = 20.0 nM  
simil = 0.857142857143

HYB 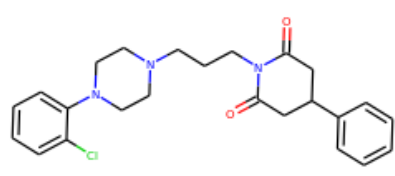 [CHEMBL1796031](https://pubchem.ncbi.nlm.nih.gov/compound/CHEMBL1796031)  
(<https://pubchem.ncbi.nlm.nih.gov/compound/CHEMBL1796031>)  
ki = 47.86 nM  
simil = 0.607242339833

Dopamine D1 receptor: ki = 1980.4512 nM Score = 4.4591

Best Fingerprints Similarity

ECFP2 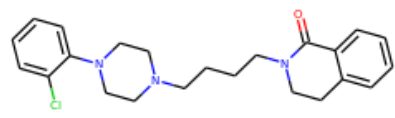 [CHEMBL514382](https://pubchem.ncbi.nlm.nih.gov/compound/CHEMBL514382)  
(<https://pubchem.ncbi.nlm.nih.gov/compound/CHEMBL514382>)  
ki = 346.74 nM  
simil = 0.653846153846

FCFP2 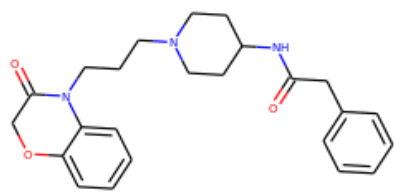 [CHEMBL1242923](https://pubchem.ncbi.nlm.nih.gov/compound/CHEMBL1242923)  
(<https://pubchem.ncbi.nlm.nih.gov/compound/CHEMBL1242923>)  
ki = 1000.0 nM  
simil = 0.75

DAY 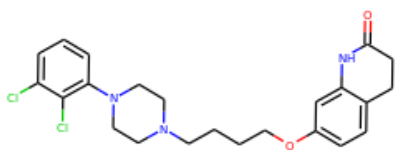 [CHEMBL1112](https://pubchem.ncbi.nlm.nih.gov/compound/CHEMBL1112) (<https://pubchem.ncbi.nlm.nih.gov/compound/CHEMBL1112>)  
ki = 310.0 nM  
simil = 0.56

PAT 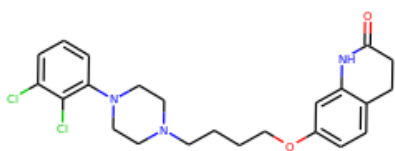 [CHEMBL1112](https://pubchem.ncbi.nlm.nih.gov/compound/CHEMBL1112) (<https://pubchem.ncbi.nlm.nih.gov/compound/CHEMBL1112>)  
ki = 310.0 nM  
simil = 0.82380952381

PAIR 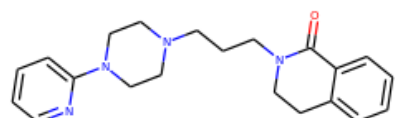 [CHEMBL477961](https://pubchem.ncbi.nlm.nih.gov/compound/CHEMBL477961)  
(<https://pubchem.ncbi.nlm.nih.gov/compound/CHEMBL477961>)  
ki = 1698.24 nM  
simil = 0.679104477612



|       |                                                                                     |                                                                                                                                                                                                       |
|-------|-------------------------------------------------------------------------------------|-------------------------------------------------------------------------------------------------------------------------------------------------------------------------------------------------------|
| TORS  | 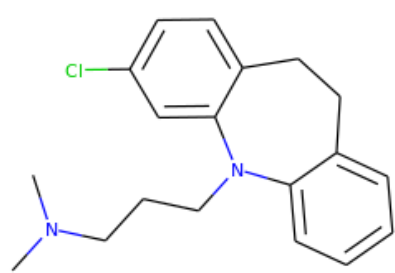    | <u>CHEMBL415</u> ( <a href="https://pubchem.ncbi.nlm.nih.gov/compound/CHEMBL415">https://pubchem.ncbi.nlm.nih.gov/compound/CHEMBL415</a> )<br>ki = 557.0 nM<br>simil = 0.558823529412                 |
| FP2   |    | <u>CHEMBL260994</u><br>( <a href="https://pubchem.ncbi.nlm.nih.gov/compound/CHEMBL260994">https://pubchem.ncbi.nlm.nih.gov/compound/CHEMBL260994</a> )<br>ki = 2400.0 nM<br>simil = 0.6               |
| PUB   |    | <u>CHEMBL516270</u><br>( <a href="https://pubchem.ncbi.nlm.nih.gov/compound/CHEMBL516270">https://pubchem.ncbi.nlm.nih.gov/compound/CHEMBL516270</a> )<br>ki = 1737.8 nM<br>simil = 0.830769230769    |
| MACCS |  | <u>CHEMBL477961</u><br>( <a href="https://pubchem.ncbi.nlm.nih.gov/compound/CHEMBL477961">https://pubchem.ncbi.nlm.nih.gov/compound/CHEMBL477961</a> )<br>ki = 1698.24 nM<br>simil = 0.914893617021   |
| KR    |  | <u>CHEMBL2298813</u><br>( <a href="https://pubchem.ncbi.nlm.nih.gov/compound/CHEMBL2298813">https://pubchem.ncbi.nlm.nih.gov/compound/CHEMBL2298813</a> )<br>ki = 1000.0 nM<br>simil = 0.573529411765 |
| GRAPH |  | <u>CHEMBL516270</u><br>( <a href="https://pubchem.ncbi.nlm.nih.gov/compound/CHEMBL516270">https://pubchem.ncbi.nlm.nih.gov/compound/CHEMBL516270</a> )<br>ki = 1737.8 nM<br>simil = 0.90243902439     |
| SUB   |  | <u>CHEMBL1112</u> ( <a href="https://pubchem.ncbi.nlm.nih.gov/compound/CHEMBL1112">https://pubchem.ncbi.nlm.nih.gov/compound/CHEMBL1112</a> )<br>ki = 310.0 nM<br>simil = 0.857142857143              |
| HYB   |                                                                                     | <u>CHEMBL1112</u> ( <a href="https://pubchem.ncbi.nlm.nih.gov/compound/CHEMBL1112">https://pubchem.ncbi.nlm.nih.gov/compound/CHEMBL1112</a> )<br>ki = 310.0 nM<br>simil = 0.520454545455              |

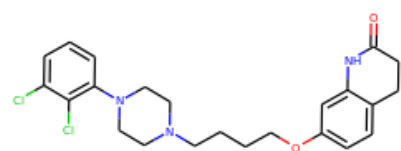

Norepinephrine transporter:  $k_i$  = N.A.00 nM Score = 4.0484

### Best Fingerprints Similarity

ECFP2

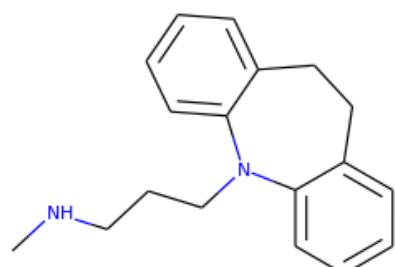

CHEMBL72 (<https://pubchem.ncbi.nlm.nih.gov/compound/CHEMBL72>)

$k_i$  = 0.6 nM

simil = 0.52

FCFP2

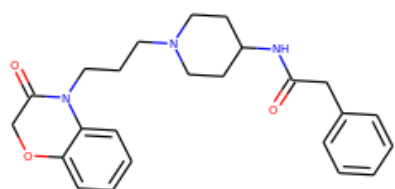

CHEMBL1242923

(<https://pubchem.ncbi.nlm.nih.gov/compound/CHEMBL1242923>)

$k_i$  = 1000.0 nM

simil = 0.75

DAY

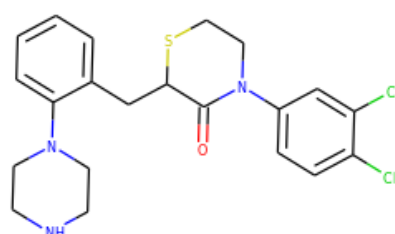

CHEMBL574126

(<https://pubchem.ncbi.nlm.nih.gov/compound/CHEMBL574126>)

$k_i$  = 5.0 nM

simil = 0.556468172485

PAT

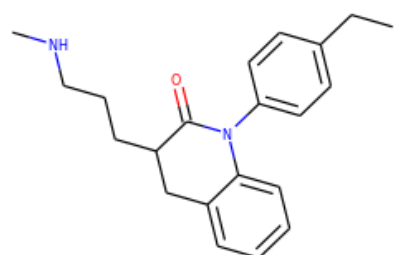

CHEMBL198038

(<https://pubchem.ncbi.nlm.nih.gov/compound/CHEMBL198038>)

$k_i$  = 150.0 nM

simil = 0.870026525199

PAIR

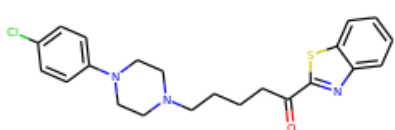

CHEMBL2037528

(<https://pubchem.ncbi.nlm.nih.gov/compound/CHEMBL2037528>)

$k_i$  = 10000.0 nM

simil = 0.462427745665

TORS



CHEMBL11 (<https://pubchem.ncbi.nlm.nih.gov/compound/CHEMBL11>)

$k_i$  = 16.0 nM

simil = 0.642857142857

FP2

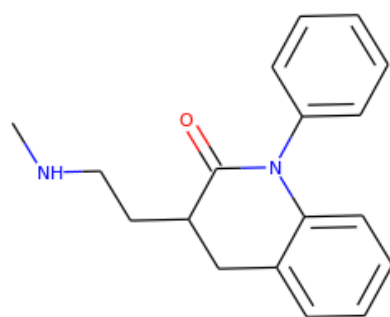

CHEMBL194310  
(<https://pubchem.ncbi.nlm.nih.gov/compound/CHEMBL194310>)  
ki = 38.0 nM  
simil = 0.62037037037

PUB

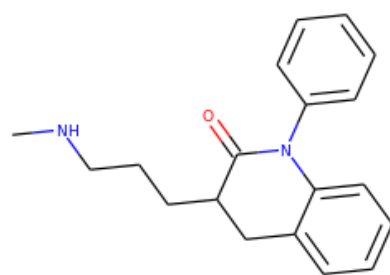

CHEMBL196365  
(<https://pubchem.ncbi.nlm.nih.gov/compound/CHEMBL196365>)  
ki = 8.0 nM  
simil = 0.868852459016

MACCS

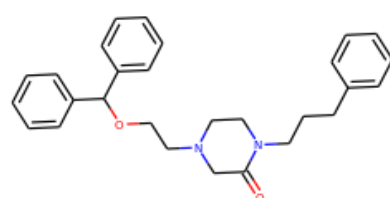

CHEMBL124222  
(<https://pubchem.ncbi.nlm.nih.gov/compound/CHEMBL124222>)  
ki = 5850.0 nM  
simil = 0.76

KR

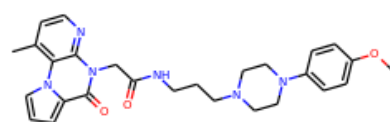

CHEMBL1729417  
(<https://pubchem.ncbi.nlm.nih.gov/compound/CHEMBL1729417>)  
ki = 1000.0 nM  
simil = 0.5

GRAPH

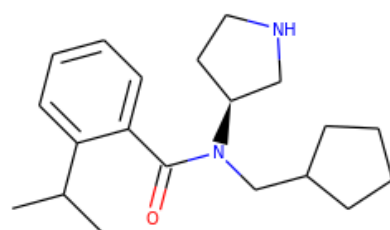

CHEMBL550402  
(<https://pubchem.ncbi.nlm.nih.gov/compound/CHEMBL550402>)  
ki = 18.0 nM  
simil = 0.76404494382

SUB

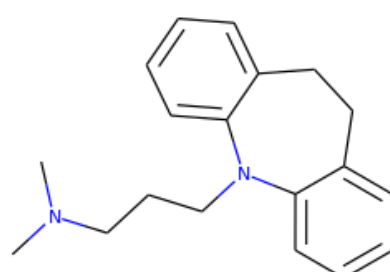

CHEMBL11 (<https://pubchem.ncbi.nlm.nih.gov/compound/CHEMBL11>)  
ki = 16.0 nM  
simil = 0.916666666667

HYB

CHEMBL574126  
(<https://pubchem.ncbi.nlm.nih.gov/compound/CHEMBL574126>)  
ki = 5.0 nM  
simil = 0.503080082136

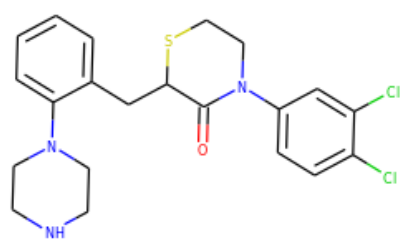

Serotonin 6 (5-HT6) receptor:  $k_i$  = 2047.3227 nM Score = 4.0272

### Best Fingerprints Similarity

ECFP2

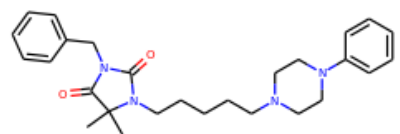

CHEMBL3233668

(<https://pubchem.ncbi.nlm.nih.gov/compound/CHEMBL3233668>)

$k_i$  = 4368.0 nM

simil = 0.551724137931

FCFP2

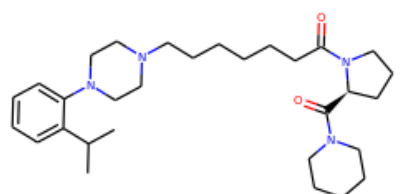

CHEMBL3409037

(<https://pubchem.ncbi.nlm.nih.gov/compound/CHEMBL3409037>)

$k_i$  = 603.0 nM

simil = 0.823529411765

DAY

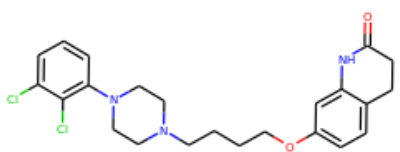

CHEMBL1112 (<https://pubchem.ncbi.nlm.nih.gov/compound/CHEMBL1112>)

$k_i$  = 90.0 nM

simil = 0.56

PAT

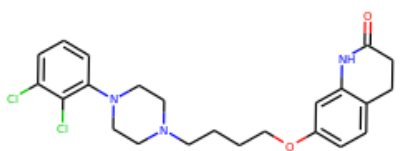

CHEMBL1112 (<https://pubchem.ncbi.nlm.nih.gov/compound/CHEMBL1112>)

$k_i$  = 90.0 nM

simil = 0.82380952381

PAIR

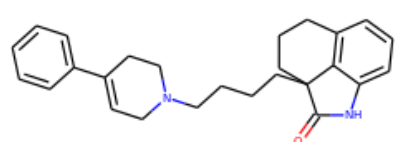

CHEMBL69257

(<https://pubchem.ncbi.nlm.nih.gov/compound/CHEMBL69257>)

$k_i$  = 524.81 nM

simil = 0.472392638037

TORS

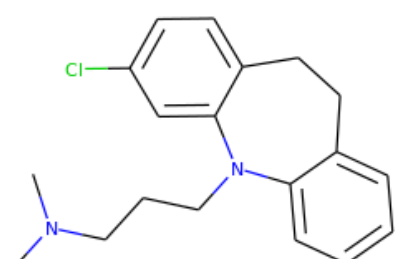

CHEMBL415 (<https://pubchem.ncbi.nlm.nih.gov/compound/CHEMBL415>)

$k_i$  = 112.0 nM

simil = 0.558823529412

FP2

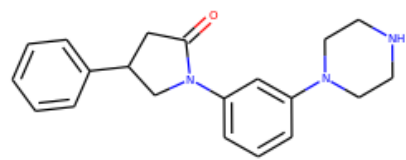

CHEMBL3260791  
(<https://pubchem.ncbi.nlm.nih.gov/compound/CHEMBL3260791>)  
ki = 84.0 nM  
simil = 0.660377358491

PUB

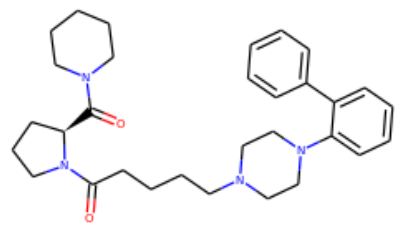

CHEMBL3409039  
(<https://pubchem.ncbi.nlm.nih.gov/compound/CHEMBL3409039>)  
ki = 376.0 nM  
simil = 0.856

MACCS

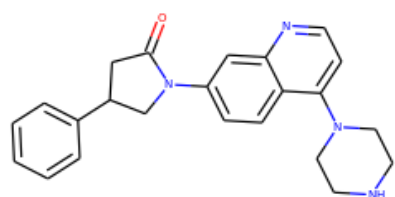

CHEMBL3260796  
(<https://pubchem.ncbi.nlm.nih.gov/compound/CHEMBL3260796>)  
ki = 55.0 nM  
simil = 0.823529411765

KR

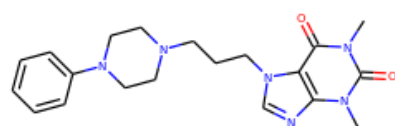

CHEMBL3360991  
(<https://pubchem.ncbi.nlm.nih.gov/compound/CHEMBL3360991>)  
ki = 20080.0 nM  
simil = 0.597222222222

GRAPH

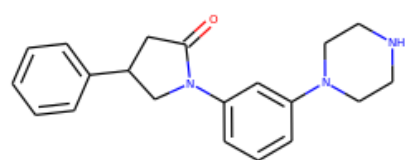

CHEMBL3260791  
(<https://pubchem.ncbi.nlm.nih.gov/compound/CHEMBL3260791>)  
ki = 84.0 nM  
simil = 0.865853658537

SUB

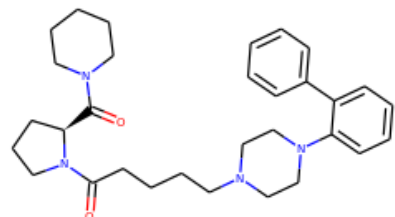

CHEMBL3409039  
(<https://pubchem.ncbi.nlm.nih.gov/compound/CHEMBL3409039>)  
ki = 376.0 nM  
simil = 0.923076923077

HYB



CHEMBL3260791  
(<https://pubchem.ncbi.nlm.nih.gov/compound/CHEMBL3260791>)  
ki = 84.0 nM  
simil = 0.595419847328

HERG: ki = N.A.00 nM Score = 3.7854

Best Fingerprints Similarity

|       |                                                                                     |                                                                                                                                                                                                                    |
|-------|-------------------------------------------------------------------------------------|--------------------------------------------------------------------------------------------------------------------------------------------------------------------------------------------------------------------|
| ECFP2 | 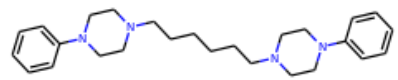   | <p><u>CHEMBL1172205</u><br/> <a href="https://pubchem.ncbi.nlm.nih.gov/compound/CHEMBL1172205">. (https://pubchem.ncbi.nlm.nih.gov/compound/CHEMBL1172205)</a><br/> ki = 8000.0 nM<br/> simil = 0.65</p>           |
| FCFP2 |    | <p><u>CHEMBL1822854</u><br/> <a href="https://pubchem.ncbi.nlm.nih.gov/compound/CHEMBL1822854">. (https://pubchem.ncbi.nlm.nih.gov/compound/CHEMBL1822854)</a><br/> ki = 13.0 nM<br/> simil = 0.75</p>             |
| DAY   |    | <p><u>CHEMBL3688396</u><br/> <a href="https://pubchem.ncbi.nlm.nih.gov/compound/CHEMBL3688396">. (https://pubchem.ncbi.nlm.nih.gov/compound/CHEMBL3688396)</a><br/> ki = 5000.0 nM<br/> simil = 0.582456140351</p> |
| PAT   |  | <p><u>CHEMBL3688396</u><br/> <a href="https://pubchem.ncbi.nlm.nih.gov/compound/CHEMBL3688396">. (https://pubchem.ncbi.nlm.nih.gov/compound/CHEMBL3688396)</a><br/> ki = 5000.0 nM<br/> simil = 0.840294840295</p> |
| PAIR  |  | <p><u>CHEMBL83894</u><br/> <a href="https://pubchem.ncbi.nlm.nih.gov/compound/CHEMBL83894">. (https://pubchem.ncbi.nlm.nih.gov/compound/CHEMBL83894)</a><br/> ki = 200.0 nM<br/> simil = 0.518987341772</p>        |
| TORS  |  | <p><u>CHEMBL72</u> <a href="https://pubchem.ncbi.nlm.nih.gov/compound/CHEMBL72">. (https://pubchem.ncbi.nlm.nih.gov/compound/CHEMBL72)</a><br/> ki = 22816.6 nM<br/> simil = 0.620689655172</p>                    |
| FP2   |  | <p><u>CHEMBL1112</u> <a href="https://pubchem.ncbi.nlm.nih.gov/compound/CHEMBL1112">. (https://pubchem.ncbi.nlm.nih.gov/compound/CHEMBL1112)</a><br/> ki = 598.0 nM<br/> simil = 0.569343065693</p>                |



PUB

ki = 6529.0 nM  
simil = 0.775362318841

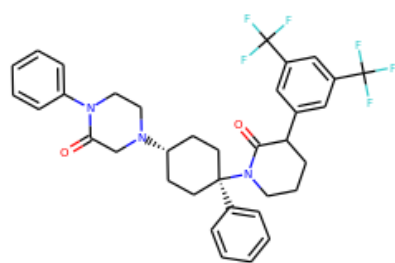

MACCS

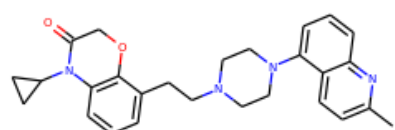

CHEMBL469568  
(<https://pubchem.ncbi.nlm.nih.gov/compound/CHEMBL469568>)  
ki = 1584.89 nM  
simil = 0.814814814815

KR

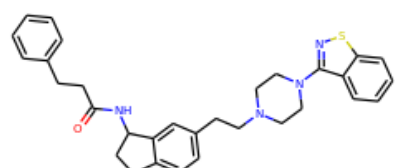

CHEMBL252201  
(<https://pubchem.ncbi.nlm.nih.gov/compound/CHEMBL252201>)  
ki = 511.0 nM  
simil = 0.58024691358

GRAPH

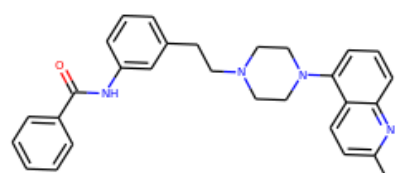

CHEMBL1632210  
(<https://pubchem.ncbi.nlm.nih.gov/compound/CHEMBL1632210>)  
ki = 50.12 nM  
simil = 0.848101265823

SUB

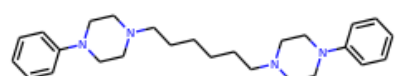

CHEMBL1172205  
(<https://pubchem.ncbi.nlm.nih.gov/compound/CHEMBL1172205>)  
ki = 8000.0 nM  
simil = 0.916666666667

HYB



CHEMBL1112 (<https://pubchem.ncbi.nlm.nih.gov/compound/CHEMBL1112>)  
ki = 598.0 nM  
simil = 0.520454545455

Melatonin receptor 1A: ki = N.A.00 nM Score = 3.2366

Best Fingerprints Similarity

ECFP2

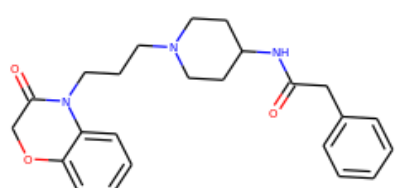

CHEMBL1242923  
(<https://pubchem.ncbi.nlm.nih.gov/compound/CHEMBL1242923>)  
ki = 1000.0 nM  
simil = 0.470588235294

|       |                                                                                     |                                                                                                                                                                                                                 |
|-------|-------------------------------------------------------------------------------------|-----------------------------------------------------------------------------------------------------------------------------------------------------------------------------------------------------------------|
| FCFP2 | 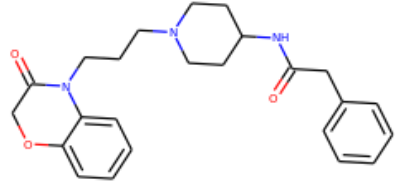   | <p><u>CHEMBL1242923</u><br/> <a href="https://pubchem.ncbi.nlm.nih.gov/compound/CHEMBL1242923">.https://pubchem.ncbi.nlm.nih.gov/compound/CHEMBL1242923</a><br/> ki = 1000.0 nM<br/> simil = 0.75</p>           |
| DAY   |    | <p><u>CHEMBL3612606</u><br/> <a href="https://pubchem.ncbi.nlm.nih.gov/compound/CHEMBL3612606">.https://pubchem.ncbi.nlm.nih.gov/compound/CHEMBL3612606</a><br/> ki = 5.8 nM<br/> simil = 0.584158415842</p>    |
| PAT   |   | <p><u>CHEMBL3612602</u><br/> <a href="https://pubchem.ncbi.nlm.nih.gov/compound/CHEMBL3612602">.https://pubchem.ncbi.nlm.nih.gov/compound/CHEMBL3612602</a><br/> ki = 633.0 nM<br/> simil = 0.893333333333</p>  |
| PAIR  |  | <p><u>CHEMBL1242923</u><br/> <a href="https://pubchem.ncbi.nlm.nih.gov/compound/CHEMBL1242923">.https://pubchem.ncbi.nlm.nih.gov/compound/CHEMBL1242923</a><br/> ki = 1000.0 nM<br/> simil = 0.426395939086</p> |
| TORS  |  | <p><u>CHEMBL360600</u><br/> <a href="https://pubchem.ncbi.nlm.nih.gov/compound/CHEMBL360600">.https://pubchem.ncbi.nlm.nih.gov/compound/CHEMBL360600</a><br/> ki = 549.54 nM<br/> simil = 0.515151515152</p>    |
| FP2   |  | <p><u>CHEMBL3612604</u><br/> <a href="https://pubchem.ncbi.nlm.nih.gov/compound/CHEMBL3612604">.https://pubchem.ncbi.nlm.nih.gov/compound/CHEMBL3612604</a><br/> ki = 0.7 nM<br/> simil = 0.732673267327</p>    |
| PUB   |  | <p><u>CHEMBL3612602</u><br/> <a href="https://pubchem.ncbi.nlm.nih.gov/compound/CHEMBL3612602">.https://pubchem.ncbi.nlm.nih.gov/compound/CHEMBL3612602</a><br/> ki = 633.0 nM<br/> simil = 0.860655737705</p>  |

MACCS

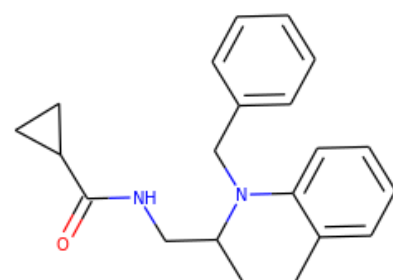

CHEMBL3612471

(<https://pubchem.ncbi.nlm.nih.gov/compound/CHEMBL3612471>)

ki = 291.0 nM

simil = 0.75

KR

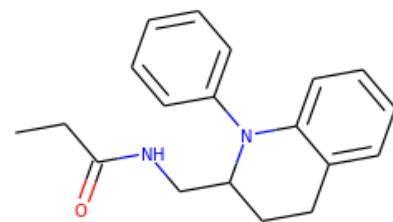

CHEMBL3612608

(<https://pubchem.ncbi.nlm.nih.gov/compound/CHEMBL3612608>)

ki = 1.6 nM

simil = 0.457831325301

GRAPH

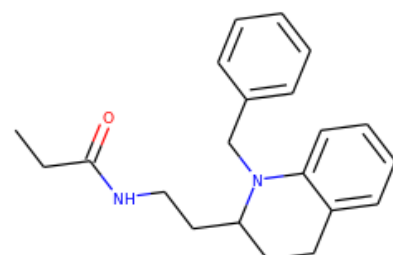

CHEMBL3612610

(<https://pubchem.ncbi.nlm.nih.gov/compound/CHEMBL3612610>)

ki = 326.0 nM

simil = 0.746666666667

SUB

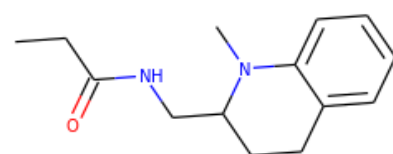

CHEMBL3612604

(<https://pubchem.ncbi.nlm.nih.gov/compound/CHEMBL3612604>)

ki = 0.7 nM

simil = 0.785714285714

HYB

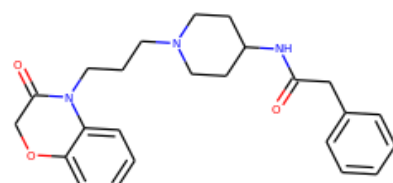

CHEMBL1242923

(<https://pubchem.ncbi.nlm.nih.gov/compound/CHEMBL1242923>)

ki = 1000.0 nM

simil = 0.454138702461

Serotonin 2 (5-HT2) receptor: ki = N.A.00 nM Score = 3.1664

Best Fingerprints Similarity

ECFP2

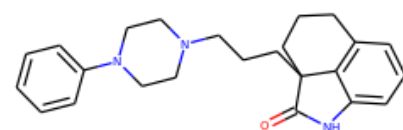

CHEMBL13052

(<https://pubchem.ncbi.nlm.nih.gov/compound/CHEMBL13052>)

ki = 16.0 nM

simil = 0.586206896552

CHEMBL331172

|       |                                                                                     |                                                                                                                                                                                                                                                                  |
|-------|-------------------------------------------------------------------------------------|------------------------------------------------------------------------------------------------------------------------------------------------------------------------------------------------------------------------------------------------------------------|
| FCFP2 | 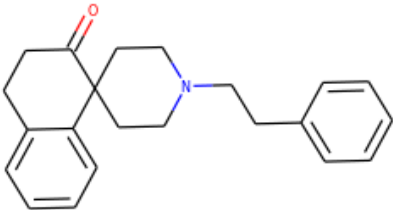   | <a href="https://pubchem.ncbi.nlm.nih.gov/compound/CHEMBL331172">.(https://pubchem.ncbi.nlm.nih.gov/compound/CHEMBL331172).</a><br>ki = 183.0 nM<br>simil = 0.75                                                                                                 |
| DAY   |    | <a href="https://pubchem.ncbi.nlm.nih.gov/compound/CHEMBL352617">CHEMBL352617</a><br><a href="https://pubchem.ncbi.nlm.nih.gov/compound/CHEMBL352617">.(https://pubchem.ncbi.nlm.nih.gov/compound/CHEMBL352617).</a><br>ki = 160.0 nM<br>simil = 0.46875         |
| PAT   |   | <a href="https://pubchem.ncbi.nlm.nih.gov/compound/CHEMBL539288">CHEMBL539288</a><br><a href="https://pubchem.ncbi.nlm.nih.gov/compound/CHEMBL539288">.(https://pubchem.ncbi.nlm.nih.gov/compound/CHEMBL539288).</a><br>ki = 7.3 nM<br>simil = 0.794270833333    |
| PAIR  |  | <a href="https://pubchem.ncbi.nlm.nih.gov/compound/CHEMBL13052">CHEMBL13052</a><br><a href="https://pubchem.ncbi.nlm.nih.gov/compound/CHEMBL13052">.(https://pubchem.ncbi.nlm.nih.gov/compound/CHEMBL13052).</a><br>ki = 16.0 nM<br>simil = 0.669064748201       |
| TORS  |  | <a href="https://pubchem.ncbi.nlm.nih.gov/compound/CHEMBL210567">CHEMBL210567</a><br><a href="https://pubchem.ncbi.nlm.nih.gov/compound/CHEMBL210567">.(https://pubchem.ncbi.nlm.nih.gov/compound/CHEMBL210567).</a><br>ki = 1600.0 nM<br>simil = 0.382978723404 |
| FP2   |  | <a href="https://pubchem.ncbi.nlm.nih.gov/compound/CHEMBL352617">CHEMBL352617</a><br><a href="https://pubchem.ncbi.nlm.nih.gov/compound/CHEMBL352617">.(https://pubchem.ncbi.nlm.nih.gov/compound/CHEMBL352617).</a><br>ki = 160.0 nM<br>simil = 0.586538461538  |
| PUB   |  | <a href="https://pubchem.ncbi.nlm.nih.gov/compound/CHEMBL112170">CHEMBL112170</a><br><a href="https://pubchem.ncbi.nlm.nih.gov/compound/CHEMBL112170">.(https://pubchem.ncbi.nlm.nih.gov/compound/CHEMBL112170).</a><br>ki = 3100.0 nM<br>simil = 0.831932773109 |

MACCS

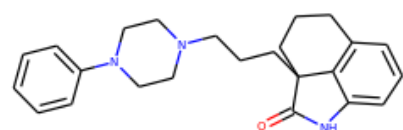

CHEMBL13052  
(<https://pubchem.ncbi.nlm.nih.gov/compound/CHEMBL13052>)  
ki = 16.0 nM  
simil = 0.823529411765

KR

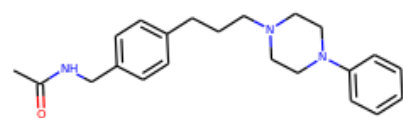

CHEMBL352617  
(<https://pubchem.ncbi.nlm.nih.gov/compound/CHEMBL352617>)  
ki = 160.0 nM  
simil = 0.626666666667

GRAPH

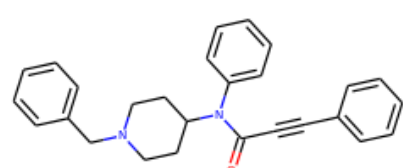

CHEMBL112170  
(<https://pubchem.ncbi.nlm.nih.gov/compound/CHEMBL112170>)  
ki = 3100.0 nM  
simil = 0.824324324324

SUB

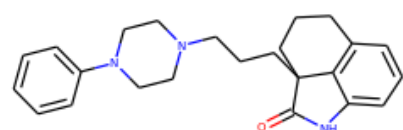

CHEMBL13052  
(<https://pubchem.ncbi.nlm.nih.gov/compound/CHEMBL13052>)  
ki = 16.0 nM  
simil = 0.923076923077

HYB

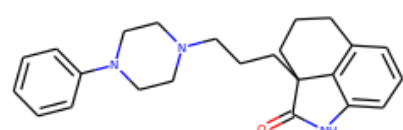

CHEMBL13052  
(<https://pubchem.ncbi.nlm.nih.gov/compound/CHEMBL13052>)  
ki = 16.0 nM  
simil = 0.460698689956

Dopamine transporter: ki = 478.0114 nM Score = 3.1095

Best Fingerprints Similarity

ECFP2

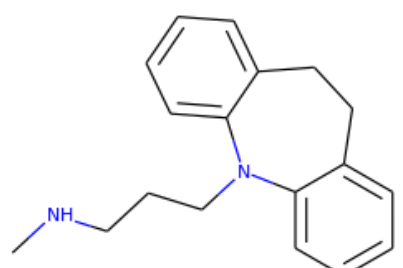

CHEMBL72 (<https://pubchem.ncbi.nlm.nih.gov/compound/CHEMBL72>)  
ki = 0.49 nM  
simil = 0.52

CHEMBL1242923

|       |                                                                                     |                                                                                                                                                                                           |
|-------|-------------------------------------------------------------------------------------|-------------------------------------------------------------------------------------------------------------------------------------------------------------------------------------------|
| FCFP2 | 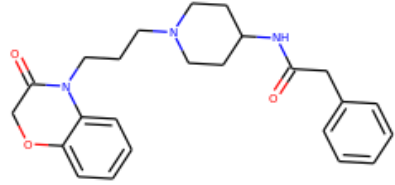   | <a href="https://pubchem.ncbi.nlm.nih.gov/compound/CHEMBL1242923">. (https://pubchem.ncbi.nlm.nih.gov/compound/CHEMBL1242923)</a><br>ki = 1000.0 nM<br>simil = 0.75                       |
| DAY   |    | <a href="https://pubchem.ncbi.nlm.nih.gov/compound/CHEMBL574126">CHEMBL574126<br/>(https://pubchem.ncbi.nlm.nih.gov/compound/CHEMBL574126)</a><br>ki = 87.0 nM<br>simil = 0.556468172485  |
| PAT   |   | <a href="https://pubchem.ncbi.nlm.nih.gov/compound/CHEMBL198038">CHEMBL198038<br/>(https://pubchem.ncbi.nlm.nih.gov/compound/CHEMBL198038)</a><br>ki = 200.0 nM<br>simil = 0.870026525199 |
| PAIR  |  | <a href="https://pubchem.ncbi.nlm.nih.gov/compound/CHEMBL466750">CHEMBL466750<br/>(https://pubchem.ncbi.nlm.nih.gov/compound/CHEMBL466750)</a><br>ki = 10.0 nM<br>simil = 0.483870967742  |
| TORS  |  | <a href="https://pubchem.ncbi.nlm.nih.gov/compound/CHEMBL72">CHEMBL72 (https://pubchem.ncbi.nlm.nih.gov/compound/CHEMBL72)</a><br>ki = 0.49 nM<br>simil = 0.620689655172                  |
| FP2   |  | <a href="https://pubchem.ncbi.nlm.nih.gov/compound/CHEMBL194310">CHEMBL194310<br/>(https://pubchem.ncbi.nlm.nih.gov/compound/CHEMBL194310)</a><br>ki = 200.0 nM<br>simil = 0.62037037037  |
| PUB   |  | <a href="https://pubchem.ncbi.nlm.nih.gov/compound/CHEMBL196365">CHEMBL196365<br/>(https://pubchem.ncbi.nlm.nih.gov/compound/CHEMBL196365)</a><br>ki = 200.0 nM<br>simil = 0.868852459016 |



|       |                                                                                     |                                                                                                                                                                                                 |
|-------|-------------------------------------------------------------------------------------|-------------------------------------------------------------------------------------------------------------------------------------------------------------------------------------------------|
| MACCS |                                                                                     | <a href="https://pubchem.ncbi.nlm.nih.gov/compound/CHEMBL2031873">. (https://pubchem.ncbi.nlm.nih.gov/compound/CHEMBL2031873)</a><br>ki = 10000.0 nM<br>simil = 0.788461538462                  |
|       | 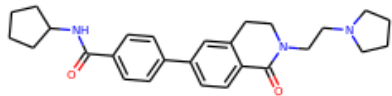   |                                                                                                                                                                                                 |
| KR    |    | CHEMBL124222<br><a href="https://pubchem.ncbi.nlm.nih.gov/compound/CHEMBL124222">. (https://pubchem.ncbi.nlm.nih.gov/compound/CHEMBL124222)</a><br>ki = 8200.0 nM<br>simil = 0.457446808511     |
| GRAPH |    | CHEMBL2031873<br><a href="https://pubchem.ncbi.nlm.nih.gov/compound/CHEMBL2031873">. (https://pubchem.ncbi.nlm.nih.gov/compound/CHEMBL2031873)</a><br>ki = 10000.0 nM<br>simil = 0.782051282051 |
| SUB   |  | CHEMBL415 <a href="https://pubchem.ncbi.nlm.nih.gov/compound/CHEMBL415">. (https://pubchem.ncbi.nlm.nih.gov/compound/CHEMBL415)</a><br>ki = 2182.0 nM<br>simil = 0.846153846154                 |
| HYB   |  | CHEMBL574126<br><a href="https://pubchem.ncbi.nlm.nih.gov/compound/CHEMBL574126">. (https://pubchem.ncbi.nlm.nih.gov/compound/CHEMBL574126)</a><br>ki = 87.0 nM<br>simil = 0.503080082136       |

Melanin-concentrating hormone receptor 1: ki = N.A.00 nM Score = 2.5579

Best Fingerprints Similarity

|       |                                                                                     |                                                                                                                                                                                            |
|-------|-------------------------------------------------------------------------------------|--------------------------------------------------------------------------------------------------------------------------------------------------------------------------------------------|
| ECFP2 | 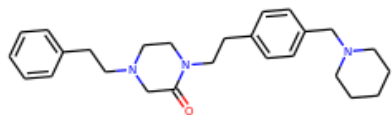 | CHEMBL217637<br><a href="https://pubchem.ncbi.nlm.nih.gov/compound/CHEMBL217637">. (https://pubchem.ncbi.nlm.nih.gov/compound/CHEMBL217637)</a><br>ki = 11.0 nM<br>simil = 0.5             |
| FCFP2 |  | CHEMBL246794<br><a href="https://pubchem.ncbi.nlm.nih.gov/compound/CHEMBL246794">. (https://pubchem.ncbi.nlm.nih.gov/compound/CHEMBL246794)</a><br>ki = 164.0 nM<br>simil = 0.777777777778 |

|       |                                                                                     |                                                                                                                                                                                                                                   |
|-------|-------------------------------------------------------------------------------------|-----------------------------------------------------------------------------------------------------------------------------------------------------------------------------------------------------------------------------------|
| DAY   | 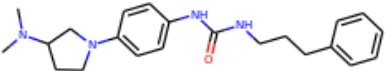   | <p><u>CHEMBL178772</u><br/> <a href="https://pubchem.ncbi.nlm.nih.gov/compound/CHEMBL178772">.https://pubchem.ncbi.nlm.nih.gov/compound/CHEMBL178772</a>)<br/>           ki = 43.0 nM<br/>           simil = 0.482260183968</p>   |
| PAT   |    | <p><u>CHEMBL215388</u><br/> <a href="https://pubchem.ncbi.nlm.nih.gov/compound/CHEMBL215388">.https://pubchem.ncbi.nlm.nih.gov/compound/CHEMBL215388</a>)<br/>           ki = 347.0 nM<br/>           simil = 0.795698924731</p>  |
| PAIR  |    | <p><u>CHEMBL217637</u><br/> <a href="https://pubchem.ncbi.nlm.nih.gov/compound/CHEMBL217637">.https://pubchem.ncbi.nlm.nih.gov/compound/CHEMBL217637</a>)<br/>           ki = 11.0 nM<br/>           simil = 0.5</p>              |
| TORS  |  | <p><u>CHEMBL3665381</u><br/> <a href="https://pubchem.ncbi.nlm.nih.gov/compound/CHEMBL3665381">.https://pubchem.ncbi.nlm.nih.gov/compound/CHEMBL3665381</a>)<br/>           ki = 9.8 nM<br/>           simil = 0.333333333333</p> |
| FP2   |  | <p><u>CHEMBL178772</u><br/> <a href="https://pubchem.ncbi.nlm.nih.gov/compound/CHEMBL178772">.https://pubchem.ncbi.nlm.nih.gov/compound/CHEMBL178772</a>)<br/>           ki = 43.0 nM<br/>           simil = 0.638095238095</p>   |
| PUB   |  | <p><u>CHEMBL388181</u><br/> <a href="https://pubchem.ncbi.nlm.nih.gov/compound/CHEMBL388181">.https://pubchem.ncbi.nlm.nih.gov/compound/CHEMBL388181</a>)<br/>           ki = 25.0 nM<br/>           simil = 0.8046875</p>        |
| MACCS |  | <p><u>CHEMBL229739</u><br/> <a href="https://pubchem.ncbi.nlm.nih.gov/compound/CHEMBL229739">.https://pubchem.ncbi.nlm.nih.gov/compound/CHEMBL229739</a>)<br/>           ki = 16.0 nM<br/>           simil = 0.857142857143</p>   |

KR

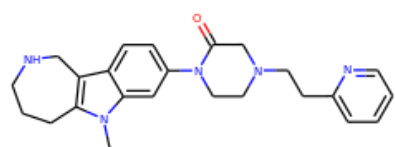

CHEMBL3665364  
(<https://pubchem.ncbi.nlm.nih.gov/compound/CHEMBL3665364>)  
ki = 44.0 nM  
simil = 0.506024096386

GRAPH

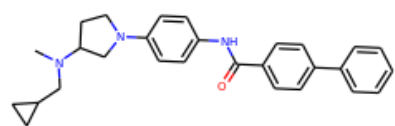

CHEMBL179346  
(<https://pubchem.ncbi.nlm.nih.gov/compound/CHEMBL179346>)  
ki = 5.5 nM  
simil = 0.817073170732

SUB

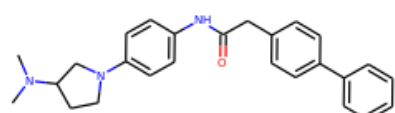

CHEMBL361423  
(<https://pubchem.ncbi.nlm.nih.gov/compound/CHEMBL361423>)  
ki = 4300.0 nM  
simil = 0.923076923077

HYB

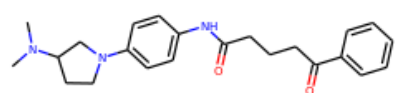

CHEMBL360567  
(<https://pubchem.ncbi.nlm.nih.gov/compound/CHEMBL360567>)  
ki = 250.0 nM  
simil = 0.471544715447

Serotonin 1b (5-HT1b) receptor: ki = N.A.00 nM Score = 2.4412

Best Fingerprints Similarity

ECFP2

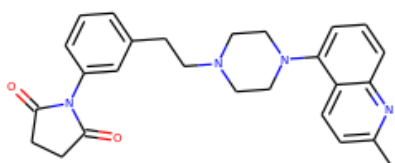

CHEMBL1631544  
(<https://pubchem.ncbi.nlm.nih.gov/compound/CHEMBL1631544>)  
ki = 39.81 nM  
simil = 0.548387096774

FCFP2

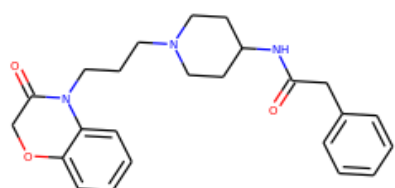

CHEMBL1242923  
(<https://pubchem.ncbi.nlm.nih.gov/compound/CHEMBL1242923>)  
ki = 1000.0 nM  
simil = 0.75

DAY

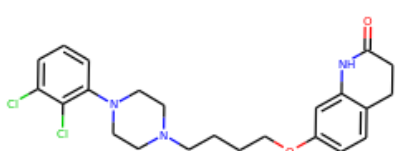

CHEMBL1112 (<https://pubchem.ncbi.nlm.nih.gov/compound/CHEMBL1112>)  
ki = 1000.0 nM  
simil = 0.56

|       |                                                                                     |                                                                                                                                                                                                        |
|-------|-------------------------------------------------------------------------------------|--------------------------------------------------------------------------------------------------------------------------------------------------------------------------------------------------------|
| PAT   | 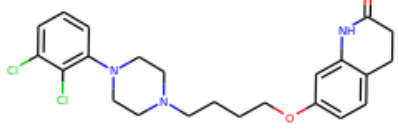   | <u>CHEMBL1112</u> ( <a href="https://pubchem.ncbi.nlm.nih.gov/compound/CHEMBL1112">https://pubchem.ncbi.nlm.nih.gov/compound/CHEMBL1112</a> ).<br>ki = 1000.0 nM<br>simil = 0.82380952381              |
| PAIR  |    | <u>CHEMBL1242923</u><br>( <a href="https://pubchem.ncbi.nlm.nih.gov/compound/CHEMBL1242923">https://pubchem.ncbi.nlm.nih.gov/compound/CHEMBL1242923</a> ).<br>ki = 1000.0 nM<br>simil = 0.426395939086 |
| TORS  |    | <u>CHEMBL1631544</u><br>( <a href="https://pubchem.ncbi.nlm.nih.gov/compound/CHEMBL1631544">https://pubchem.ncbi.nlm.nih.gov/compound/CHEMBL1631544</a> ).<br>ki = 39.81 nM<br>simil = 0.463414634146  |
| FP2   |  | <u>CHEMBL1112</u> ( <a href="https://pubchem.ncbi.nlm.nih.gov/compound/CHEMBL1112">https://pubchem.ncbi.nlm.nih.gov/compound/CHEMBL1112</a> ).<br>ki = 1000.0 nM<br>simil = 0.569343065693             |
| PUB   |  | <u>CHEMBL98241</u><br>( <a href="https://pubchem.ncbi.nlm.nih.gov/compound/CHEMBL98241">https://pubchem.ncbi.nlm.nih.gov/compound/CHEMBL98241</a> ).<br>ki = 7700.0 nM<br>simil = 0.7734375            |
| MACCS |  | <u>CHEMBL1631544</u><br>( <a href="https://pubchem.ncbi.nlm.nih.gov/compound/CHEMBL1631544">https://pubchem.ncbi.nlm.nih.gov/compound/CHEMBL1631544</a> ).<br>ki = 39.81 nM<br>simil = 0.843137254902  |
| KR    |  | <u>CHEMBL1631544</u><br>( <a href="https://pubchem.ncbi.nlm.nih.gov/compound/CHEMBL1631544">https://pubchem.ncbi.nlm.nih.gov/compound/CHEMBL1631544</a> ).<br>ki = 39.81 nM<br>simil = 0.566265060241  |

|       |                                                                                    |                                                                                                                                                                                                      |
|-------|------------------------------------------------------------------------------------|------------------------------------------------------------------------------------------------------------------------------------------------------------------------------------------------------|
| GRAPH | 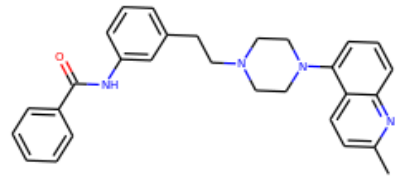  | <u>CHEMBL1632210</u><br>( <a href="https://pubchem.ncbi.nlm.nih.gov/compound/CHEMBL1632210">https://pubchem.ncbi.nlm.nih.gov/compound/CHEMBL1632210</a> )<br>ki = 2.512 nM<br>simil = 0.848101265823 |
| SUB   |   | <u>CHEMBL491839</u><br>( <a href="https://pubchem.ncbi.nlm.nih.gov/compound/CHEMBL491839">https://pubchem.ncbi.nlm.nih.gov/compound/CHEMBL491839</a> )<br>ki = 0.631 nM<br>simil = 0.857142857143    |
| HYB   |  | <u>CHEMBL2424668</u><br>( <a href="https://pubchem.ncbi.nlm.nih.gov/compound/CHEMBL2424668">https://pubchem.ncbi.nlm.nih.gov/compound/CHEMBL2424668</a> )<br>ki = 700.0 nM<br>simil = 0.580508474576 |

Serotonin 2b (5-HT2b) receptor: ki = N.A.00 nM Score = 2.2304

#### Best Fingerprints Similarity

|       |                                                                                     |                                                                                                                                                                                                     |
|-------|-------------------------------------------------------------------------------------|-----------------------------------------------------------------------------------------------------------------------------------------------------------------------------------------------------|
| ECFP2 | 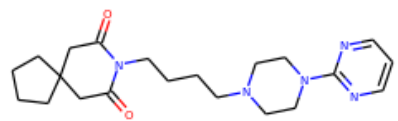 | <u>CHEMBL49</u> ( <a href="https://pubchem.ncbi.nlm.nih.gov/compound/CHEMBL49">https://pubchem.ncbi.nlm.nih.gov/compound/CHEMBL49</a> )<br>ki = 477.0 nM<br>simil = 0.51724137931                   |
| FCFP2 |  | <u>CHEMBL383800</u><br>( <a href="https://pubchem.ncbi.nlm.nih.gov/compound/CHEMBL383800">https://pubchem.ncbi.nlm.nih.gov/compound/CHEMBL383800</a> )<br>ki = 1258.93 nM<br>simil = 0.823529411765 |
| DAY   |  | <u>CHEMBL2165126</u><br>( <a href="https://pubchem.ncbi.nlm.nih.gov/compound/CHEMBL2165126">https://pubchem.ncbi.nlm.nih.gov/compound/CHEMBL2165126</a> )<br>ki = 0.6 nM<br>simil = 0.575824175824  |
| PAT   |  | <u>CHEMBL1112</u> ( <a href="https://pubchem.ncbi.nlm.nih.gov/compound/CHEMBL1112">https://pubchem.ncbi.nlm.nih.gov/compound/CHEMBL1112</a> )<br>ki = 0.36 nM                                       |

simil = 0.82380952381

PAIR

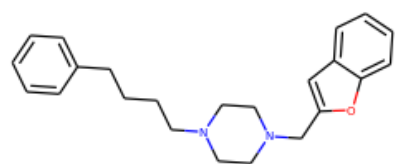

CHEMBL1834258  
(<https://pubchem.ncbi.nlm.nih.gov/compound/CHEMBL1834258>)  
ki = 275.0 nM  
simil = 0.5234375

TORS

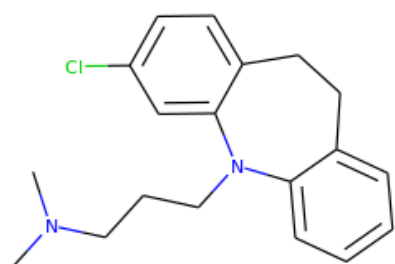

CHEMBL415 (<https://pubchem.ncbi.nlm.nih.gov/compound/CHEMBL415>)  
ki = 152.0 nM  
simil = 0.558823529412

FP2

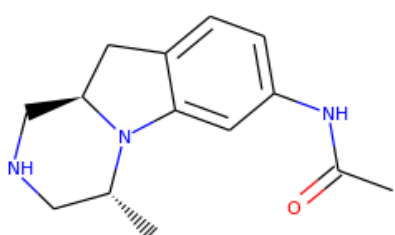

CHEMBL187787  
(<https://pubchem.ncbi.nlm.nih.gov/compound/CHEMBL187787>)  
ki = 960.0 nM  
simil = 0.691588785047

PUB

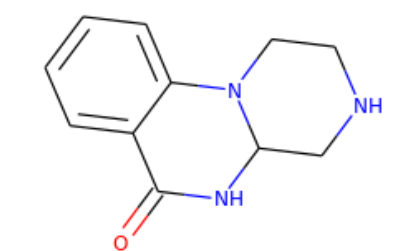

CHEMBL590077  
(<https://pubchem.ncbi.nlm.nih.gov/compound/CHEMBL590077>)  
ki = 137.0 nM  
simil = 0.77037037037

MACCS

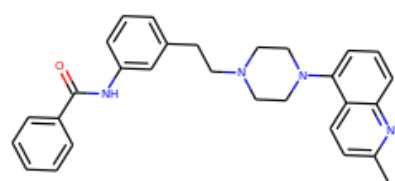

CHEMBL1632210  
(<https://pubchem.ncbi.nlm.nih.gov/compound/CHEMBL1632210>)  
ki = 125.89 nM  
simil = 0.8125

KR

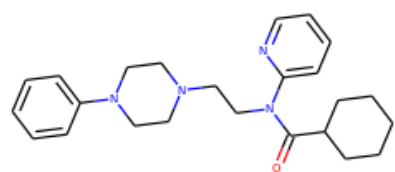

CHEMBL2164350  
(<https://pubchem.ncbi.nlm.nih.gov/compound/CHEMBL2164350>)  
ki = 327.0 nM  
simil = 0.536082474227

GRAPH

CHEMBL1632210  
(<https://pubchem.ncbi.nlm.nih.gov/compound/CHEMBL1632210>)  
ki = 125.89 nM  
simil = 0.848101265823



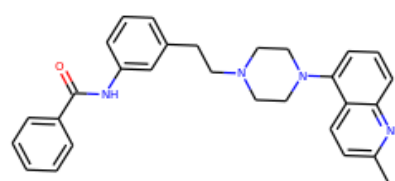

SUB

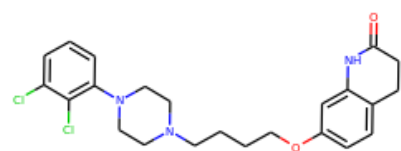

[CHEMBL1112 \(https://pubchem.ncbi.nlm.nih.gov/compound/CHEMBL1112\)](https://pubchem.ncbi.nlm.nih.gov/compound/CHEMBL1112)

ki = 0.36 nM

simil = 0.857142857143

HYB

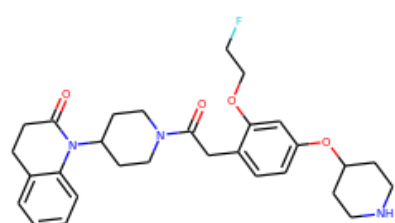

[CHEMBL2424668](https://pubchem.ncbi.nlm.nih.gov/compound/CHEMBL2424668)

[\(https://pubchem.ncbi.nlm.nih.gov/compound/CHEMBL2424668\)](https://pubchem.ncbi.nlm.nih.gov/compound/CHEMBL2424668)

ki = 500.0 nM

simil = 0.580508474576

Neuronal acetylcholine receptor protein alpha-7 subunit: ki = N.A.00 nM Score = 2.2068

Best Fingerprints Similarity

ECFP2

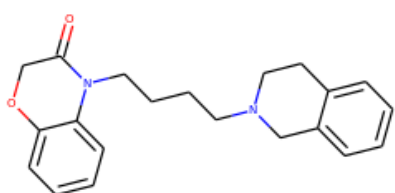

[CHEMBL1828844](https://pubchem.ncbi.nlm.nih.gov/compound/CHEMBL1828844)

[\(https://pubchem.ncbi.nlm.nih.gov/compound/CHEMBL1828844\)](https://pubchem.ncbi.nlm.nih.gov/compound/CHEMBL1828844)

ki = 4.5 nM

simil = 0.72

FCFP2

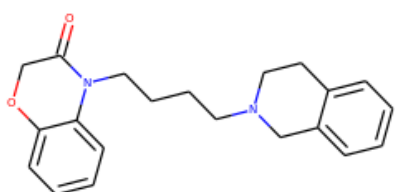

[CHEMBL1828844](https://pubchem.ncbi.nlm.nih.gov/compound/CHEMBL1828844)

[\(https://pubchem.ncbi.nlm.nih.gov/compound/CHEMBL1828844\)](https://pubchem.ncbi.nlm.nih.gov/compound/CHEMBL1828844)

ki = 4.5 nM

simil = 0.882352941176

DAY

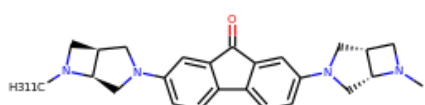

[CHEMBL3235498](https://pubchem.ncbi.nlm.nih.gov/compound/CHEMBL3235498)

[\(https://pubchem.ncbi.nlm.nih.gov/compound/CHEMBL3235498\)](https://pubchem.ncbi.nlm.nih.gov/compound/CHEMBL3235498)

ki = 0.092 nM

simil = 0.384756657484

PAT

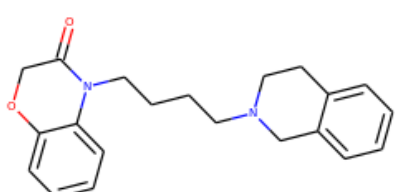

[CHEMBL1828844](https://pubchem.ncbi.nlm.nih.gov/compound/CHEMBL1828844)

[\(https://pubchem.ncbi.nlm.nih.gov/compound/CHEMBL1828844\)](https://pubchem.ncbi.nlm.nih.gov/compound/CHEMBL1828844)

ki = 4.5 nM

simil = 0.780193236715

PAIR

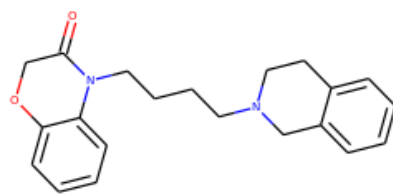

[CHEMBL1828844](https://pubchem.ncbi.nlm.nih.gov/compound/CHEMBL1828844)  
(<https://pubchem.ncbi.nlm.nih.gov/compound/CHEMBL1828844>)  
ki = 4.5 nM  
simil = 0.60447761194

TORS

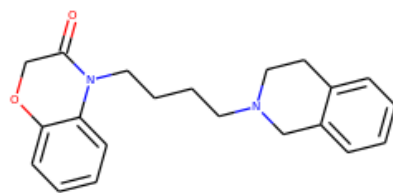

[CHEMBL1828844](https://pubchem.ncbi.nlm.nih.gov/compound/CHEMBL1828844)  
(<https://pubchem.ncbi.nlm.nih.gov/compound/CHEMBL1828844>)  
ki = 4.5 nM  
simil = 0.512195121951

FP2

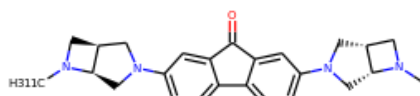

[CHEMBL3235498](https://pubchem.ncbi.nlm.nih.gov/compound/CHEMBL3235498)  
(<https://pubchem.ncbi.nlm.nih.gov/compound/CHEMBL3235498>)  
ki = 0.092 nM  
simil = 0.449612403101

PUB

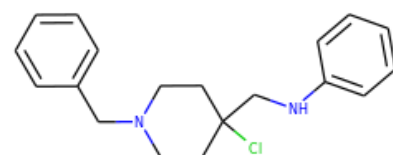

[CHEMBL1740345](https://pubchem.ncbi.nlm.nih.gov/compound/CHEMBL1740345)  
(<https://pubchem.ncbi.nlm.nih.gov/compound/CHEMBL1740345>)  
ki = 4.5 nM  
simil = 0.715447154472

MACCS

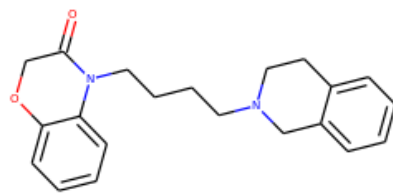

[CHEMBL1828844](https://pubchem.ncbi.nlm.nih.gov/compound/CHEMBL1828844)  
(<https://pubchem.ncbi.nlm.nih.gov/compound/CHEMBL1828844>)  
ki = 4.5 nM  
simil = 0.769230769231

KR

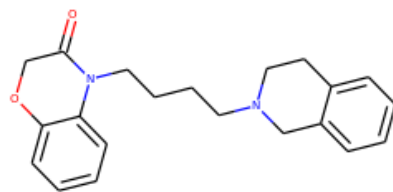

[CHEMBL1828844](https://pubchem.ncbi.nlm.nih.gov/compound/CHEMBL1828844)  
(<https://pubchem.ncbi.nlm.nih.gov/compound/CHEMBL1828844>)  
ki = 4.5 nM  
simil = 0.443181818182

GRAPH

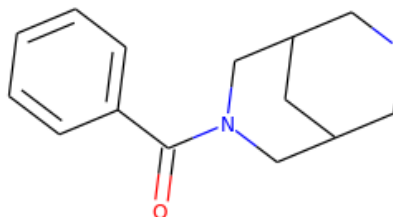

[CHEMBL2179522](https://pubchem.ncbi.nlm.nih.gov/compound/CHEMBL2179522)  
(<https://pubchem.ncbi.nlm.nih.gov/compound/CHEMBL2179522>)  
ki = 34000.0 nM  
simil = 0.717948717949

SUB

[CHEMBL1828844](https://pubchem.ncbi.nlm.nih.gov/compound/CHEMBL1828844)  
(<https://pubchem.ncbi.nlm.nih.gov/compound/CHEMBL1828844>)  
ki = 4.5 nM  
simil = 0.846153846154

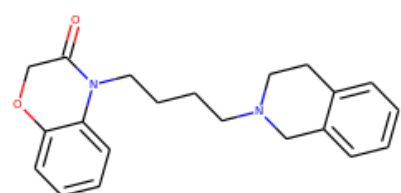

HYB

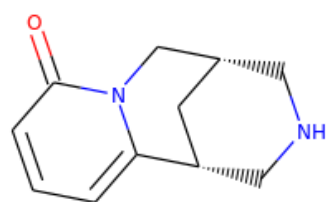

CHEMBL497939  
(<https://pubchem.ncbi.nlm.nih.gov/compound/CHEMBL497939>)  
ki = 1420.0 nM  
simil = 0.412997903564

Cannabinoid CB2 receptor: ki = N.A.00 nM Score = 2.1196

Best Fingerprints Similarity

ECFP2

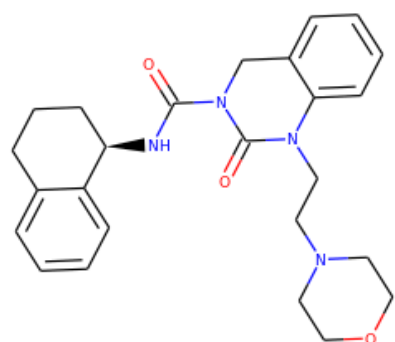

CHEMBL521668  
(<https://pubchem.ncbi.nlm.nih.gov/compound/CHEMBL521668>)  
ki = 9.0 nM  
simil = 0.444444444444

FCFP2

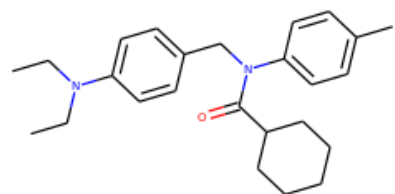

CHEMBL2326303  
(<https://pubchem.ncbi.nlm.nih.gov/compound/CHEMBL2326303>)  
ki = 221.82 nM  
simil = 0.722222222222

DAY

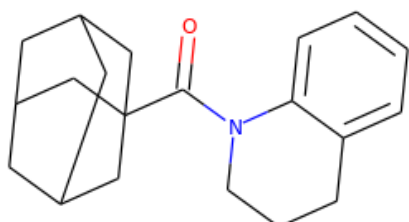

CHEMBL246952  
(<https://pubchem.ncbi.nlm.nih.gov/compound/CHEMBL246952>)  
ki = 790.0 nM  
simil = 0.665399239544

PAT

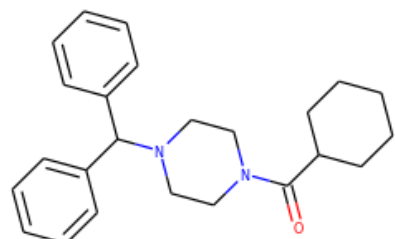

CHEMBL1088730  
(<https://pubchem.ncbi.nlm.nih.gov/compound/CHEMBL1088730>)  
ki = 3050.0 nM  
simil = 0.797843665768

PAIR

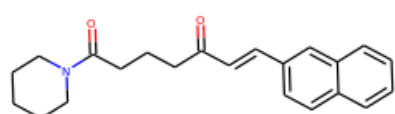

CHEMBL1288181  
(<https://pubchem.ncbi.nlm.nih.gov/compound/CHEMBL1288181>)  
ki = 10000.0 nM  
simil = 0.540145985401

|       |                                                                                     |                                                                                                                                                                                                                 |
|-------|-------------------------------------------------------------------------------------|-----------------------------------------------------------------------------------------------------------------------------------------------------------------------------------------------------------------|
| TORS  | 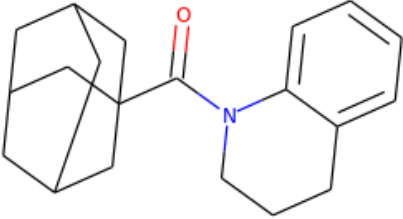   | <p><u>CHEMBL246952</u><br/> <a href="https://pubchem.ncbi.nlm.nih.gov/compound/CHEMBL246952">.https://pubchem.ncbi.nlm.nih.gov/compound/CHEMBL246952</a>)<br/> ki = 790.0 nM<br/> simil = 0.527777777778</p>    |
| FP2   |    | <p><u>CHEMBL246952</u><br/> <a href="https://pubchem.ncbi.nlm.nih.gov/compound/CHEMBL246952">.https://pubchem.ncbi.nlm.nih.gov/compound/CHEMBL246952</a>)<br/> ki = 790.0 nM<br/> simil = 0.72</p>              |
| PUB   |   | <p><u>CHEMBL246952</u><br/> <a href="https://pubchem.ncbi.nlm.nih.gov/compound/CHEMBL246952">.https://pubchem.ncbi.nlm.nih.gov/compound/CHEMBL246952</a>)<br/> ki = 790.0 nM<br/> simil = 0.859504132231</p>    |
| MACCS |  | <p><u>CHEMBL590551</u><br/> <a href="https://pubchem.ncbi.nlm.nih.gov/compound/CHEMBL590551">.https://pubchem.ncbi.nlm.nih.gov/compound/CHEMBL590551</a>)<br/> ki = 1846.0 nM<br/> simil = 0.78431372549</p>    |
| KR    |  | <p><u>CHEMBL3092895</u><br/> <a href="https://pubchem.ncbi.nlm.nih.gov/compound/CHEMBL3092895">.https://pubchem.ncbi.nlm.nih.gov/compound/CHEMBL3092895</a>)<br/> ki = 459.0 nM<br/> simil = 0.517647058824</p> |
| GRAPH |  | <p><u>CHEMBL250026</u><br/> <a href="https://pubchem.ncbi.nlm.nih.gov/compound/CHEMBL250026">.https://pubchem.ncbi.nlm.nih.gov/compound/CHEMBL250026</a>)<br/> ki = 23.3 nM<br/> simil = 0.784090909091</p>     |
| SUB   |  | <p><u>CHEMBL2179754</u><br/> <a href="https://pubchem.ncbi.nlm.nih.gov/compound/CHEMBL2179754">.https://pubchem.ncbi.nlm.nih.gov/compound/CHEMBL2179754</a>)<br/> ki = 71.0 nM<br/> simil = 0.846153846154</p>  |

HYB

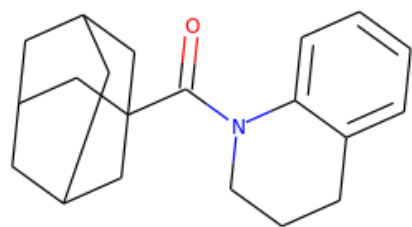

CHEMBL246952

(<https://pubchem.ncbi.nlm.nih.gov/compound/CHEMBL246952>)

ki = 790.0 nM

simil = 0.534391534392
