# Supplementary material
Source: publisher figshare collection journal article supplement (https://acs.figshare.com/ndownloader/files/13834631)
Supplement: Supplementary file 13 [file 13834631]

# SwissTargetPrediction report:

## Reference:

Gfeller D., Michielin O. & Zoete V.  
 Shaping the interaction landscape of  
 bioactive molecules, *Bioinformatics*  
 (2013) 29:3073-3079.

## Query Molecule

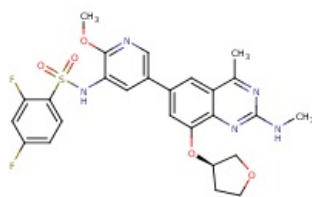

## Frequency of Target Class

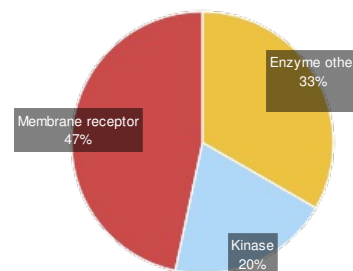

| Target                                                                                                | Uniprot ID | Gene code | ChEMBL ID  | Probability            | # sim. cmpds (3D / 2D) | Target Class      |
|-------------------------------------------------------------------------------------------------------|------------|-----------|------------|------------------------|------------------------|-------------------|
| Phosphatidylinositol 4,5-bisphosphate 3-kinase catalytic subunit delta isoform ( <i>by homology</i> ) | O00329     | PIK3CD    | CHEMBL3130 | <div><div></div></div> | 86 / 63                | Enzyme            |
| Phosphatidylinositol 4,5-bisphosphate 3-kinase catalytic subunit alpha isoform                        | P42336     | PIK3CA    | CHEMBL4005 | <div><div></div></div> | 87 / 63                | Enzyme            |
| Phosphatidylinositol 4,5-bisphosphate 3-kinase catalytic subunit beta isoform ( <i>by homology</i> )  | P42338     | PIK3CB    | CHEMBL3145 | <div><div></div></div> | 86 / 63                | Enzyme            |
| Serine/threonine-protein kinase mTOR                                                                  | P42345     | MTOR      | CHEMBL2842 | <div><div></div></div> | 75 / 16                | Enzyme            |
| High affinity nerve growth factor receptor                                                            | P04629     | NTRK1     | CHEMBL2815 | <div><div></div></div> | 6 / 3                  | Tyr Kinase        |
| NT-3 growth factor receptor ( <i>by homology</i> )                                                    | Q16288     | NTRK3     | CHEMBL5608 | <div><div></div></div> | 6 / 3                  | Tyr Kinase        |
| BDNF/NT-3 growth factors receptor ( <i>by homology</i> )                                              | Q16620     | NTRK2     | CHEMBL4898 | <div><div></div></div> | 6 / 3                  | Tyr Kinase        |
| Phosphatidylinositol 4,5-bisphosphate 3-kinase catalytic subunit gamma isoform                        | P48736     | PIK3CG    | CHEMBL3267 | <div><div></div></div> | 26 / 8                 | Enzyme            |
| C-C chemokine receptor type 1                                                                         | P32246     | CCR1      | CHEMBL2413 | <div><div></div></div> | 34 / 7                 | Membrane receptor |
| C-C chemokine receptor type 2                                                                         | P41597     | CCR2      | CHEMBL4015 | <div><div></div></div> | 34 / 7                 | Membrane receptor |
| C-C chemokine receptor type 3 ( <i>by homology</i> )                                                  | P51677     | CCR3      | CHEMBL3473 | <div><div></div></div> | 34 / 7                 | Membrane receptor |
| C-C chemokine receptor type 5 ( <i>by homology</i> )                                                  | P51681     | CCR5      | CHEMBL274  | <div><div></div></div> | 34 / 7                 | Membrane receptor |
| Beta-2 adrenergic receptor                                                                            | P07550     | ADRB2     | CHEMBL210  | <div><div></div></div> | 131 / 11               | Membrane receptor |
| Beta-1 adrenergic receptor                                                                            | P08588     | ADRB1     | CHEMBL213  | <div><div></div></div> | 129 / 11               | Membrane receptor |
| Beta-3 adrenergic receptor ( <i>by homology</i> )                                                     | P13945     | ADRB3     | CHEMBL246  | <div><div></div></div> | 126 / 11               | Membrane receptor |
