# Supplementary material
Source: publisher figshare collection journal article supplement (https://acs.figshare.com/ndownloader/files/13834631)
Supplement: Supplementary file 14 [file 13834631]

# SwissTargetPrediction report:

## Reference:

Gfeller D., Michielin O. & Zoete V.  
 Shaping the interaction landscape of  
 bioactive molecules, *Bioinformatics*  
 (2013) 29:3073-3079.

## Query Molecule

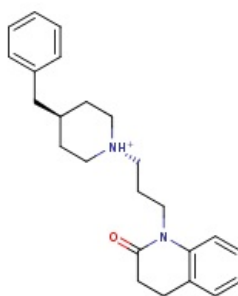

## Frequency of Target Class

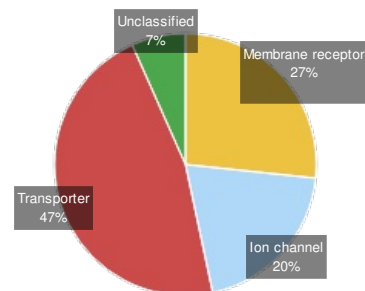

| Target                                                                                      | Uniprot ID | Gene code | ChEMBL ID     | Probability            | # sim. cmpds (3D / 2D) | Target Class      |
|---------------------------------------------------------------------------------------------|------------|-----------|---------------|------------------------|------------------------|-------------------|
| D(2) dopamine receptor                                                                      | P14416     | DRD2      | CHEMBL217     | <div><div></div></div> | 962 / 238              | Membrane receptor |
| D(3) dopamine receptor                                                                      | P35462     | DRD3      | CHEMBL234     | <div><div></div></div> | 554 / 246              | Membrane receptor |
| Potassium voltage-gated channel subfamily H member 2                                        | Q12809     | KCNH2     | CHEMBL240     | <div><div></div></div> | 162 / 54               | Ion channel       |
| Potassium voltage-gated channel subfamily H member 6 (by homology)                          | Q9H252     | KCNH6     |               | <div><div></div></div> | 162 / 54               | Ion channel       |
| Potassium voltage-gated channel subfamily H member 7 (by homology)                          | Q9NS40     | KCNH7     |               | <div><div></div></div> | 162 / 54               | Ion channel       |
| Sodium-dependent noradrenaline transporter                                                  | P23975     | SLC6A2    | CHEMBL222     | <div><div></div></div> | 297 / 216              | Transporter       |
| Sodium-dependent serotonin transporter                                                      | P31645     | SLC6A4    | CHEMBL228     | <div><div></div></div> | 382 / 210              | Transporter       |
| Sodium-dependent dopamine transporter (by homology)                                         | Q01959     | SLC6A3    | CHEMBL238     | <div><div></div></div> | 297 / 216              | Transporter       |
| Sodium- and chloride-dependent glycine transporter 1 (by homology)                          | P48067     | SLC6A9    | CHEMBL2337    | <div><div></div></div> | 213 / 169              | Transporter       |
| Sodium- and chloride-dependent glycine transporter 2 (by homology)                          | Q9Y345     | SLC6A5    | CHEMBL3060    | <div><div></div></div> | 213 / 169              | Transporter       |
| Sodium-dependent proline transporter (by homology)                                          | Q99884     | SLC6A7    |               | <div><div></div></div> | 213 / 169              | Transporter       |
| Sodium- and chloride-dependent neutral and basic amino acid transporter B(0+) (by homology) | Q9UN76     | SLC6A14   |               | <div><div></div></div> | 213 / 169              | Transporter       |
| Vasopressin V1a receptor (by homology)                                                      | P37288     | AVPR1A    | CHEMBL1889    | <div><div></div></div> | 40 / 157               | Membrane receptor |
| Sigma non-opioid intracellular receptor 1                                                   | Q99720     | SIGMAR1   | CHEMBL287     | <div><div></div></div> | 218 / 45               | Membrane receptor |
| Muscleblind-like protein 1                                                                  | Q9NR56     | MBNL1     | CHEMBL1293317 | <div><div></div></div> | 31 / 70                | Unclassified      |
