# Supplementary material
Source: publisher figshare collection journal article supplement (https://acs.figshare.com/ndownloader/files/13834631)
Supplement: Supplementary file 15 [file 13834631]

# ChemOracle<sup>®</sup> (/)

An integrated web-based platform for target prediction: your compounds our solutions!

[HOME \(/\)](#)

[PREDICTION \(/PREDICTION/\)](#)

[ABOUT US \(/ABOUT\\_US/\)](#)

Your molecule

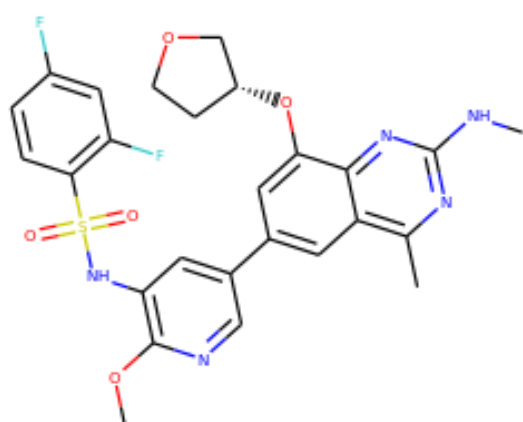

has 4 possible target(s) !

PI3-kinase p110-alpha subunit: ic50 = N.A. nM Score = 7.5725

Best Fingerprints Similarity

ECFP2

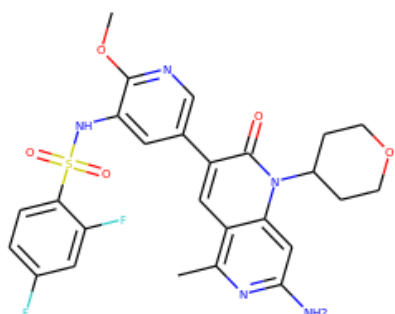

CHEMBL3112713

(<https://pubchem.ncbi.nlm.nih.gov/compound/CHEMBL3112713>)

ic50 = 8.6 nM

simil = 0.660377358491

FCFP2

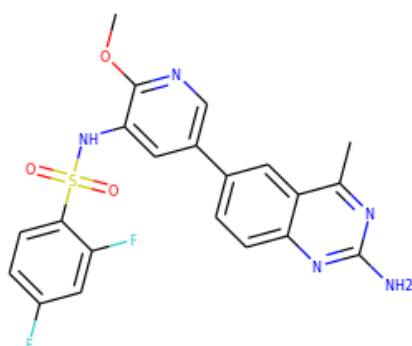

CHEMBL3112720

(<https://pubchem.ncbi.nlm.nih.gov/compound/CHEMBL3112720>)

ic50 = 3.43 nM

simil = 0.764705882353

DAY

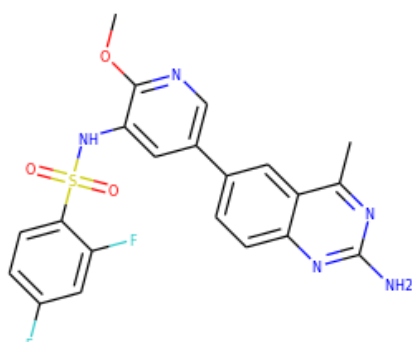

CHEMBL3112720

(<https://pubchem.ncbi.nlm.nih.gov/compound/CHEMBL3112720>)

ic50 = 3.43 nM

simil = 0.822142857143

PAT

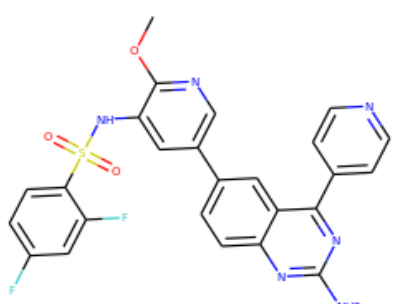

CHEMBL3577914

(<https://pubchem.ncbi.nlm.nih.gov/compound/CHEMBL3577914>)

ic50 = 0.07 nM

simil = 0.888888888889

Latest News

Website alpha-v  
Launched

October 10th, 201

Work in progress.

|       |                                                                                     |                                                                                                                                                                                                       |
|-------|-------------------------------------------------------------------------------------|-------------------------------------------------------------------------------------------------------------------------------------------------------------------------------------------------------|
| PAIR  | 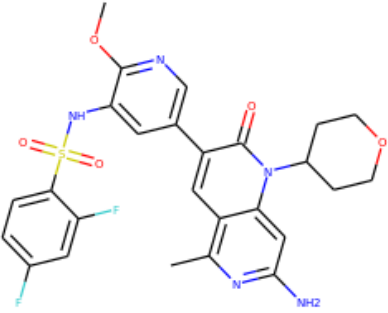    | <u>CHEMBL3112713</u><br>( <a href="https://pubchem.ncbi.nlm.nih.gov/compound/CHEMBL3112713">https://pubchem.ncbi.nlm.nih.gov/compound/CHEMBL3112713</a> )<br>ic50 = 8.6 nM<br>simil = 0.560810810811  |
| TORS  |    | <u>CHEMBL3112720</u><br>( <a href="https://pubchem.ncbi.nlm.nih.gov/compound/CHEMBL3112720">https://pubchem.ncbi.nlm.nih.gov/compound/CHEMBL3112720</a> )<br>ic50 = 3.43 nM<br>simil = 0.672413793103 |
| FP2   |   | <u>CHEMBL3112720</u><br>( <a href="https://pubchem.ncbi.nlm.nih.gov/compound/CHEMBL3112720">https://pubchem.ncbi.nlm.nih.gov/compound/CHEMBL3112720</a> )<br>ic50 = 3.43 nM<br>simil = 0.778301886792 |
| PUB   |  | <u>CHEMBL3112720</u><br>( <a href="https://pubchem.ncbi.nlm.nih.gov/compound/CHEMBL3112720">https://pubchem.ncbi.nlm.nih.gov/compound/CHEMBL3112720</a> )<br>ic50 = 3.43 nM<br>simil = 0.891774891775 |
| MACCS |  | <u>CHEMBL3660132</u><br>( <a href="https://pubchem.ncbi.nlm.nih.gov/compound/CHEMBL3660132">https://pubchem.ncbi.nlm.nih.gov/compound/CHEMBL3660132</a> )<br>ic50 = 0.53 nM<br>simil = 0.827956989247 |
| KR    |  | <u>CHEMBL3655870</u><br>( <a href="https://pubchem.ncbi.nlm.nih.gov/compound/CHEMBL3655870">https://pubchem.ncbi.nlm.nih.gov/compound/CHEMBL3655870</a> )<br>ic50 = 0.86 nM<br>simil = 0.578947368421 |
| GRAPH |  | <u>CHEMBL3112720</u><br>( <a href="https://pubchem.ncbi.nlm.nih.gov/compound/CHEMBL3112720">https://pubchem.ncbi.nlm.nih.gov/compound/CHEMBL3112720</a> )<br>ic50 = 3.43 nM<br>simil = 0.72972972973  |
| SUB   |                                                                                     | <u>CHEMBL3655879</u><br>( <a href="https://pubchem.ncbi.nlm.nih.gov/compound/CHEMBL3655879">https://pubchem.ncbi.nlm.nih.gov/compound/CHEMBL3655879</a> )<br>ic50 = 0.63 nM<br>simil = 0.842105263158 |

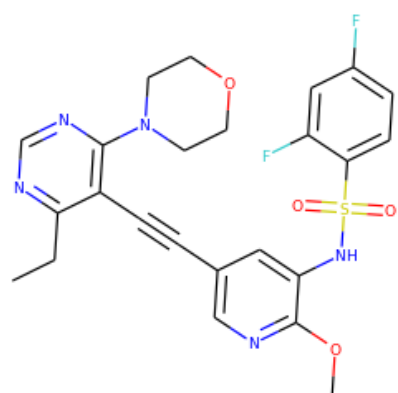

HYB

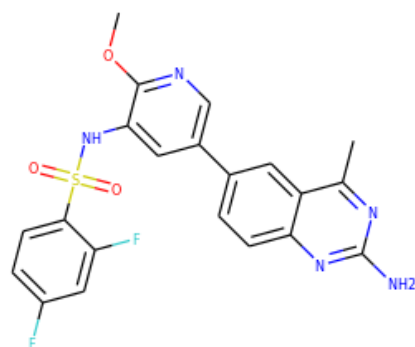

CHEMBL3112720  
 (<https://pubchem.ncbi.nlm.nih.gov/compound/CHEMBL3112720>)  
 ic50 = 3.43 nM  
 simil = 0.705179282869

Serine/threonine-protein kinase mTOR: ic50 = N.A. nM Score = 7.5487

### Best Fingerprints Similarity

ECFP2

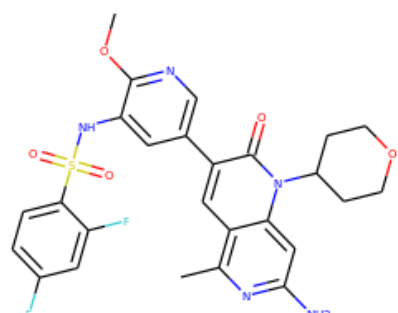

CHEMBL3112713  
 (<https://pubchem.ncbi.nlm.nih.gov/compound/CHEMBL3112713>)  
 ic50 = 13.36 nM  
 simil = 0.660377358491

FCFP2

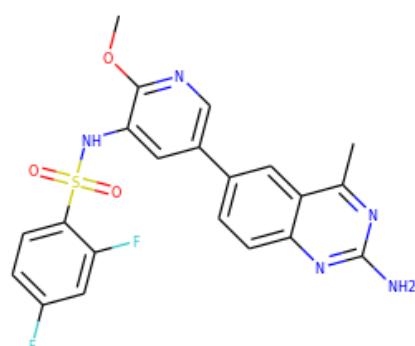

CHEMBL3112720  
 (<https://pubchem.ncbi.nlm.nih.gov/compound/CHEMBL3112720>)  
 ic50 = 2.32 nM  
 simil = 0.764705882353

DAY

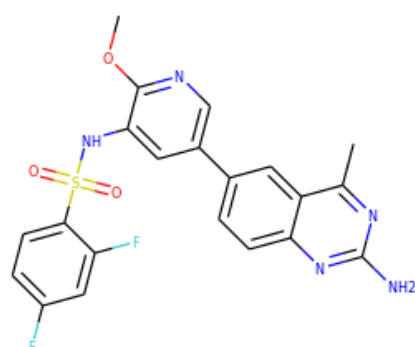

CHEMBL3112720  
 (<https://pubchem.ncbi.nlm.nih.gov/compound/CHEMBL3112720>)  
 ic50 = 2.32 nM  
 simil = 0.822142857143

PAT

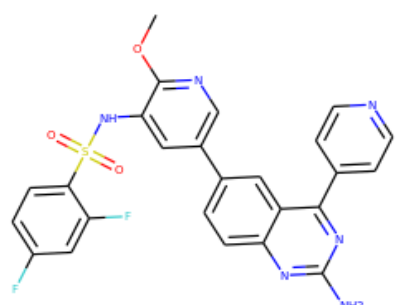

CHEMBL3577914  
 (<https://pubchem.ncbi.nlm.nih.gov/compound/CHEMBL3577914>)  
 ic50 = 0.29 nM  
 simil = 0.888888888889

PAIR

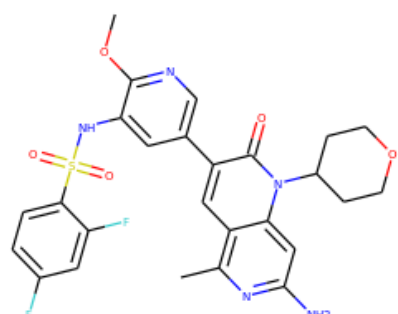

CHEMBL3112713  
 (<https://pubchem.ncbi.nlm.nih.gov/compound/CHEMBL3112713>)  
 ic50 = 13.36 nM  
 simil = 0.560810810811

TORS

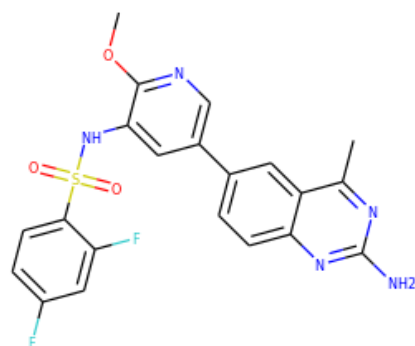

CHEMBL3112720

(<https://pubchem.ncbi.nlm.nih.gov/compound/CHEMBL3112720>)

ic50 = 2.32 nM

simil = 0.672413793103

FP2



CHEMBL3112720

(<https://pubchem.ncbi.nlm.nih.gov/compound/CHEMBL3112720>)

ic50 = 2.32 nM

simil = 0.778301886792

PUB

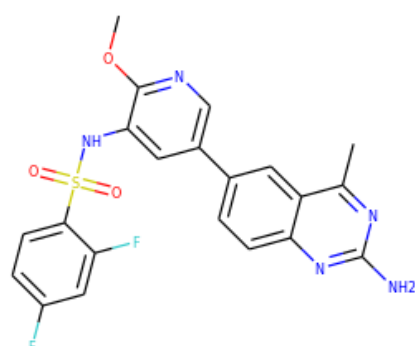

CHEMBL3112720

(<https://pubchem.ncbi.nlm.nih.gov/compound/CHEMBL3112720>)

ic50 = 2.32 nM

simil = 0.891774891775

MACCS

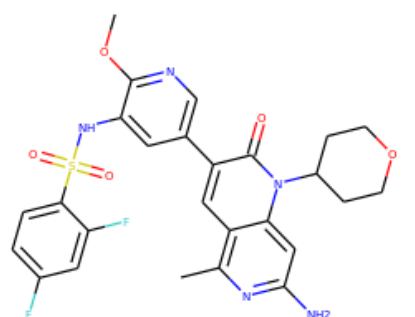

CHEMBL3112713

(<https://pubchem.ncbi.nlm.nih.gov/compound/CHEMBL3112713>)

ic50 = 13.36 nM

simil = 0.80412371134

KR



CHEMBL3112720

(<https://pubchem.ncbi.nlm.nih.gov/compound/CHEMBL3112720>)

ic50 = 2.32 nM

simil = 0.551724137931

GRAPH

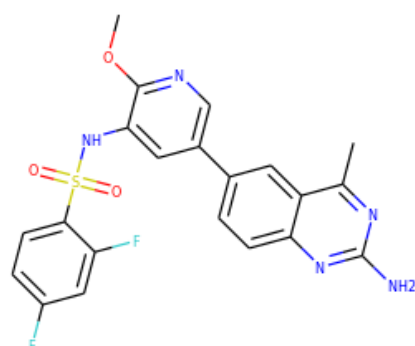

CHEMBL3112720

(<https://pubchem.ncbi.nlm.nih.gov/compound/CHEMBL3112720>)

ic50 = 2.32 nM

simil = 0.72972972973

SUB

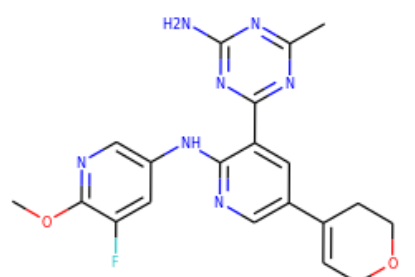

CHEMBL3646622

(<https://pubchem.ncbi.nlm.nih.gov/compound/CHEMBL3646622>)

ic50 = 10000.0 nM

simil = 0.789473684211

CHEMBL3112720

HYB [.\(https://pubchem.ncbi.nlm.nih.gov/compound/CHEMBL3112720\)](https://pubchem.ncbi.nlm.nih.gov/compound/CHEMBL3112720)  
ic50 = 2.32 nM  
simil = 0.705179282869



PI4-kinase alpha subunit: ic50 = N.A. nM Score = 7.134

Best Fingerprints Similarity

ECFP2 [CHEMBL3121326](https://pubchem.ncbi.nlm.nih.gov/compound/CHEMBL3121326)  
[.\(https://pubchem.ncbi.nlm.nih.gov/compound/CHEMBL3121326\)](https://pubchem.ncbi.nlm.nih.gov/compound/CHEMBL3121326)  
ic50 = 10.0 nM  
simil = 0.634615384615

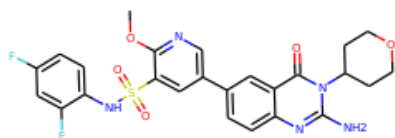

FCFP2 [CHEMBL3121328](https://pubchem.ncbi.nlm.nih.gov/compound/CHEMBL3121328)  
[.\(https://pubchem.ncbi.nlm.nih.gov/compound/CHEMBL3121328\)](https://pubchem.ncbi.nlm.nih.gov/compound/CHEMBL3121328)  
ic50 = 39.81 nM  
simil = 0.722222222222

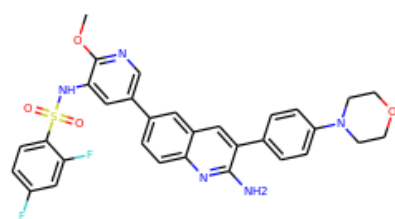

DAY [CHEMBL3121315](https://pubchem.ncbi.nlm.nih.gov/compound/CHEMBL3121315)  
[.\(https://pubchem.ncbi.nlm.nih.gov/compound/CHEMBL3121315\)](https://pubchem.ncbi.nlm.nih.gov/compound/CHEMBL3121315)  
ic50 = 3981.07 nM  
simil = 0.734582829504

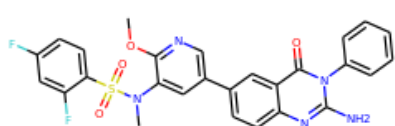

PAT [CHEMBL3121334](https://pubchem.ncbi.nlm.nih.gov/compound/CHEMBL3121334)  
[.\(https://pubchem.ncbi.nlm.nih.gov/compound/CHEMBL3121334\)](https://pubchem.ncbi.nlm.nih.gov/compound/CHEMBL3121334)  
ic50 = 1.585 nM  
simil = 0.859675036928

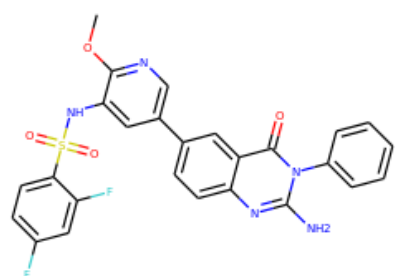

PAIR [CHEMBL3121327](https://pubchem.ncbi.nlm.nih.gov/compound/CHEMBL3121327)  
[.\(https://pubchem.ncbi.nlm.nih.gov/compound/CHEMBL3121327\)](https://pubchem.ncbi.nlm.nih.gov/compound/CHEMBL3121327)  
ic50 = 1.585 nM  
simil = 0.537688442211

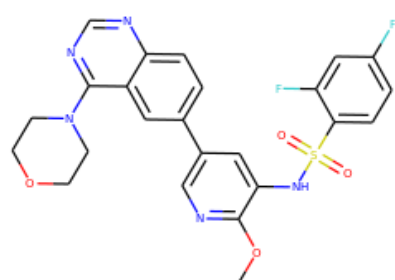

TORS [CHEMBL3121330](https://pubchem.ncbi.nlm.nih.gov/compound/CHEMBL3121330)  
[.\(https://pubchem.ncbi.nlm.nih.gov/compound/CHEMBL3121330\)](https://pubchem.ncbi.nlm.nih.gov/compound/CHEMBL3121330)  
ic50 = 630.96 nM  
simil = 0.590163934426

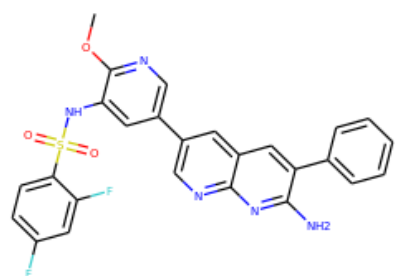



FP2

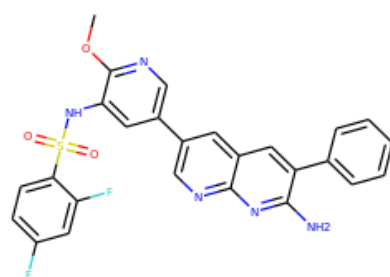

CHEMBL3121330

(<https://pubchem.ncbi.nlm.nih.gov/compound/CHEMBL3121330>)

ic50 = 630.96 nM

simil = 0.685840707965

PUB

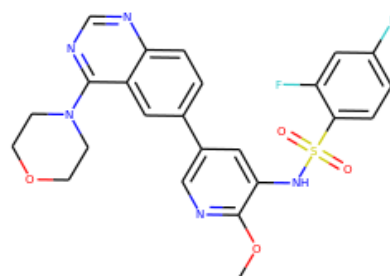

CHEMBL3121327

(<https://pubchem.ncbi.nlm.nih.gov/compound/CHEMBL3121327>)

ic50 = 1.585 nM

simil = 0.886075949367

MACCS

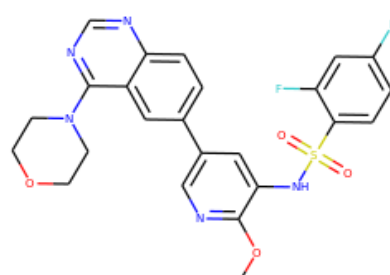

CHEMBL3121327

(<https://pubchem.ncbi.nlm.nih.gov/compound/CHEMBL3121327>)

ic50 = 1.585 nM

simil = 0.826086956522

KR

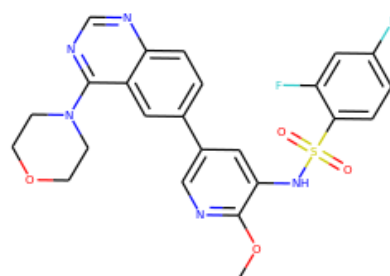

CHEMBL3121327

(<https://pubchem.ncbi.nlm.nih.gov/compound/CHEMBL3121327>)

ic50 = 1.585 nM

simil = 0.565217391304

GRAPH

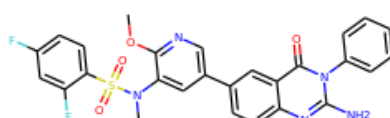

CHEMBL3121315

(<https://pubchem.ncbi.nlm.nih.gov/compound/CHEMBL3121315>)

ic50 = 3981.07 nM

simil = 0.70036101083

SUB

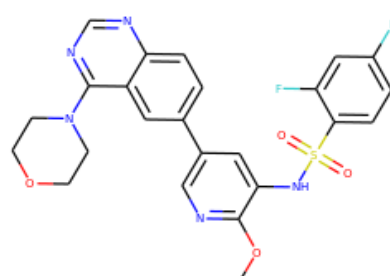

CHEMBL3121327

(<https://pubchem.ncbi.nlm.nih.gov/compound/CHEMBL3121327>)

ic50 = 1.585 nM

simil = 0.823529411765

HYB

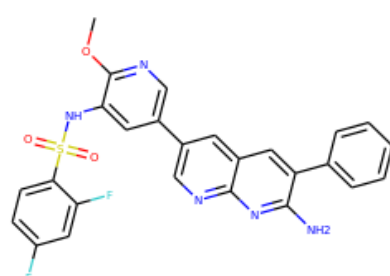

CHEMBL3121330

(<https://pubchem.ncbi.nlm.nih.gov/compound/CHEMBL3121330>)

ic50 = 630.96 nM

simil = 0.657088122605

PI3-kinase p110-gamma subunit: ic50 = N.A. nM Score = 7.134

Best Fingerprints Similarity

|       |                                                                                     |                                                                                                                                                                                                                       |
|-------|-------------------------------------------------------------------------------------|-----------------------------------------------------------------------------------------------------------------------------------------------------------------------------------------------------------------------|
| ECFP2 | 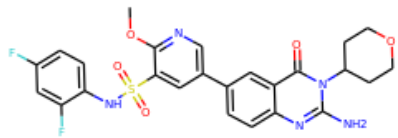   | <p><u>CHEMBL3121326</u><br/> <a href="https://pubchem.ncbi.nlm.nih.gov/compound/CHEMBL3121326">. (https://pubchem.ncbi.nlm.nih.gov/compound/CHEMBL3121326)</a><br/> ic50 = 501.19 nM<br/> simil = 0.634615384615</p>  |
| FCFP2 |    | <p><u>CHEMBL3121328</u><br/> <a href="https://pubchem.ncbi.nlm.nih.gov/compound/CHEMBL3121328">. (https://pubchem.ncbi.nlm.nih.gov/compound/CHEMBL3121328)</a><br/> ic50 = 630.96 nM<br/> simil = 0.722222222222</p>  |
| DAY   |    | <p><u>CHEMBL3121315</u><br/> <a href="https://pubchem.ncbi.nlm.nih.gov/compound/CHEMBL3121315">. (https://pubchem.ncbi.nlm.nih.gov/compound/CHEMBL3121315)</a><br/> ic50 = 3981.07 nM<br/> simil = 0.734582829504</p> |
| PAT   |  | <p><u>CHEMBL3121334</u><br/> <a href="https://pubchem.ncbi.nlm.nih.gov/compound/CHEMBL3121334">. (https://pubchem.ncbi.nlm.nih.gov/compound/CHEMBL3121334)</a><br/> ic50 = 3.981 nM<br/> simil = 0.859675036928</p>   |
| PAIR  |  | <p><u>CHEMBL3121327</u><br/> <a href="https://pubchem.ncbi.nlm.nih.gov/compound/CHEMBL3121327">. (https://pubchem.ncbi.nlm.nih.gov/compound/CHEMBL3121327)</a><br/> ic50 = 2.512 nM<br/> simil = 0.537688442211</p>   |
| TORS  |  | <p><u>CHEMBL3121330</u><br/> <a href="https://pubchem.ncbi.nlm.nih.gov/compound/CHEMBL3121330">. (https://pubchem.ncbi.nlm.nih.gov/compound/CHEMBL3121330)</a><br/> ic50 = 6309.57 nM<br/> simil = 0.590163934426</p> |
| FP2   |  | <p><u>CHEMBL3121330</u><br/> <a href="https://pubchem.ncbi.nlm.nih.gov/compound/CHEMBL3121330">. (https://pubchem.ncbi.nlm.nih.gov/compound/CHEMBL3121330)</a><br/> ic50 = 6309.57 nM<br/> simil = 0.685840707965</p> |
| PUB   |                                                                                     | <p><u>CHEMBL3121327</u><br/> <a href="https://pubchem.ncbi.nlm.nih.gov/compound/CHEMBL3121327">. (https://pubchem.ncbi.nlm.nih.gov/compound/CHEMBL3121327)</a><br/> ic50 = 2.512 nM<br/> simil = 0.886075949367</p>   |

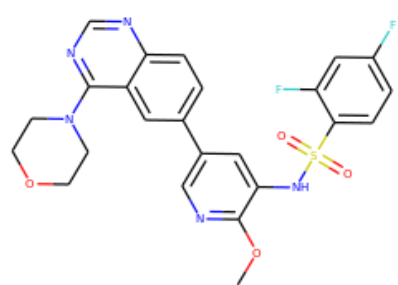

MACCS

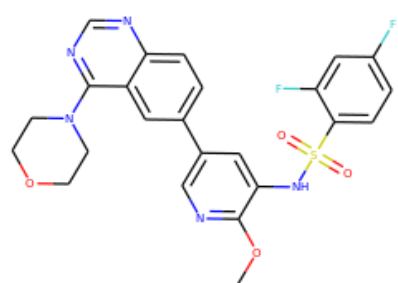

CHEMBL3121327

(<https://pubchem.ncbi.nlm.nih.gov/compound/CHEMBL3121327>)

ic50 = 2.512 nM

simil = 0.826086956522

KR

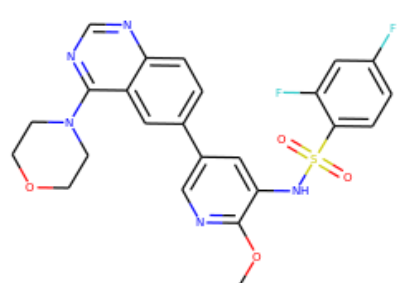

CHEMBL3121327

(<https://pubchem.ncbi.nlm.nih.gov/compound/CHEMBL3121327>)

ic50 = 2.512 nM

simil = 0.565217391304

GRAPH

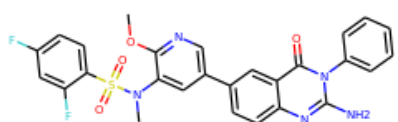

CHEMBL3121315

(<https://pubchem.ncbi.nlm.nih.gov/compound/CHEMBL3121315>)

ic50 = 3981.07 nM

simil = 0.70036101083

SUB

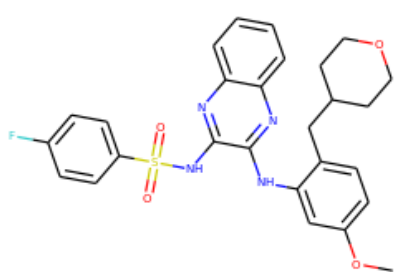

CHEMBL3652126

(<https://pubchem.ncbi.nlm.nih.gov/compound/CHEMBL3652126>)

ic50 = 150.0 nM

simil = 0.833333333333

HYB

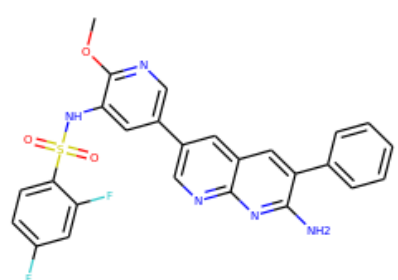

CHEMBL3121330

(<https://pubchem.ncbi.nlm.nih.gov/compound/CHEMBL3121330>)

ic50 = 6309.57 nM

simil = 0.657088122605
