# Supplementary material
Source: publisher figshare collection journal article supplement (https://acs.figshare.com/ndownloader/files/13834631)
Supplement: Supplementary file 17 [file 13834631]

# ChemOracle<sup>®</sup> (/)

An integrated web-based platform for target prediction: your compounds our solutions!

[HOME \(/\)](#)

[PREDICTION \(/PREDICTION/\)](#)

[ABOUT US \(/ABOUT\\_US/\)](#)

Your molecule

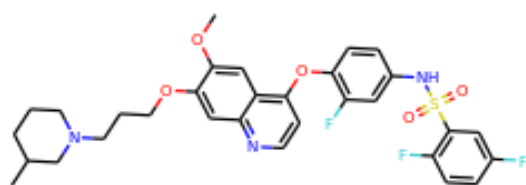

has 13 possible target(s) !

Tyrosine-protein kinase receptor UFO: ic50 = N.A.00 nM Score = 11.9375

Best Fingerprints Similarity

ECFP2

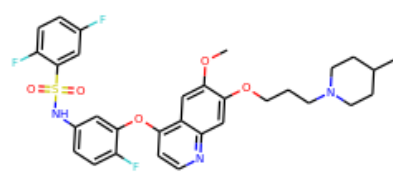

CHEMBL2023351  
(<https://pubchem.ncbi.nlm.nih.gov/compound/CHEMBL2023351>)  
ic50 = 16.0 nM  
simil = 0.951219512195

FCFP2

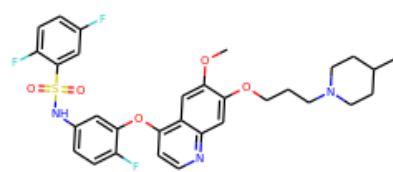

CHEMBL2023351  
(<https://pubchem.ncbi.nlm.nih.gov/compound/CHEMBL2023351>)  
ic50 = 16.0 nM  
simil = 1.0

DAY

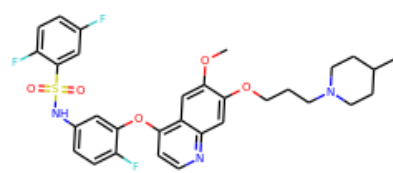

CHEMBL2023351  
(<https://pubchem.ncbi.nlm.nih.gov/compound/CHEMBL2023351>)  
ic50 = 16.0 nM  
simil = 0.89590747331

PAT

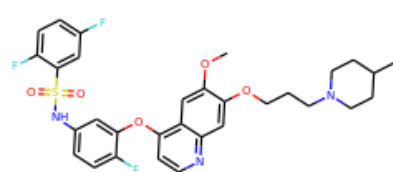

CHEMBL2023351  
(<https://pubchem.ncbi.nlm.nih.gov/compound/CHEMBL2023351>)  
ic50 = 16.0 nM  
simil = 0.98813559322

Latest News

Website alpha-v  
Launched  
*October 10th, 201*

Work in progress.

|       |                                                                                     |                                                                                                                                                                                                                    |
|-------|-------------------------------------------------------------------------------------|--------------------------------------------------------------------------------------------------------------------------------------------------------------------------------------------------------------------|
| PAIR  | 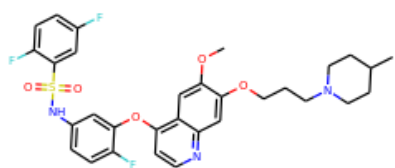   | <p><u>CHEMBL2023351</u><br/> <a href="https://pubchem.ncbi.nlm.nih.gov/compound/CHEMBL2023351">. (https://pubchem.ncbi.nlm.nih.gov/compound/CHEMBL2023351)</a><br/> ic50 = 16.0 nM<br/> simil = 0.692307692308</p> |
| TORS  |    | <p><u>CHEMBL2023351</u><br/> <a href="https://pubchem.ncbi.nlm.nih.gov/compound/CHEMBL2023351">. (https://pubchem.ncbi.nlm.nih.gov/compound/CHEMBL2023351)</a><br/> ic50 = 16.0 nM<br/> simil = 0.903846153846</p> |
| FP2   |   | <p><u>CHEMBL2023351</u><br/> <a href="https://pubchem.ncbi.nlm.nih.gov/compound/CHEMBL2023351">. (https://pubchem.ncbi.nlm.nih.gov/compound/CHEMBL2023351)</a><br/> ic50 = 16.0 nM<br/> simil = 0.9</p>            |
| PUB   |  | <p><u>CHEMBL2023351</u><br/> <a href="https://pubchem.ncbi.nlm.nih.gov/compound/CHEMBL2023351">. (https://pubchem.ncbi.nlm.nih.gov/compound/CHEMBL2023351)</a><br/> ic50 = 16.0 nM<br/> simil = 1.0</p>            |
| MACCS |  | <p><u>CHEMBL2023351</u><br/> <a href="https://pubchem.ncbi.nlm.nih.gov/compound/CHEMBL2023351">. (https://pubchem.ncbi.nlm.nih.gov/compound/CHEMBL2023351)</a><br/> ic50 = 16.0 nM<br/> simil = 0.987804878049</p> |
| KR    |  | <p><u>CHEMBL2023351</u><br/> <a href="https://pubchem.ncbi.nlm.nih.gov/compound/CHEMBL2023351">. (https://pubchem.ncbi.nlm.nih.gov/compound/CHEMBL2023351)</a><br/> ic50 = 16.0 nM<br/> simil = 0.875</p>          |
| GRAPH |  | <p><u>CHEMBL2023351</u><br/> <a href="https://pubchem.ncbi.nlm.nih.gov/compound/CHEMBL2023351">. (https://pubchem.ncbi.nlm.nih.gov/compound/CHEMBL2023351)</a><br/> ic50 = 16.0 nM<br/> simil = 0.856459330144</p> |
| SUB   |                                                                                     | <p><u>CHEMBL2023351</u><br/> <a href="https://pubchem.ncbi.nlm.nih.gov/compound/CHEMBL2023351">. (https://pubchem.ncbi.nlm.nih.gov/compound/CHEMBL2023351)</a><br/> ic50 = 16.0 nM<br/> simil = 1.0</p>            |

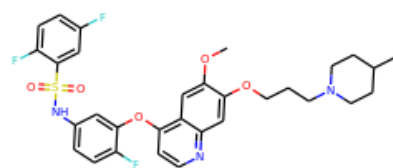

HYB

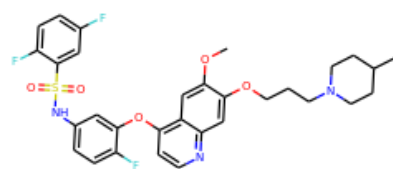

CHEMBL2023351

(<https://pubchem.ncbi.nlm.nih.gov/compound/CHEMBL2023351>)

ic50 = 16.0 nM

simil = 0.886836027714

Hepatocyte growth factor receptor: ic50 = N.A.00 nM Score = 10.6018

Best Fingerprints Similarity

ECFP2

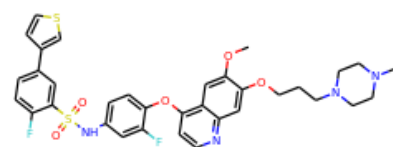

CHEMBL3263965

(<https://pubchem.ncbi.nlm.nih.gov/compound/CHEMBL3263965>)

ic50 = 1664.0 nM

simil = 0.723404255319

FCFP2

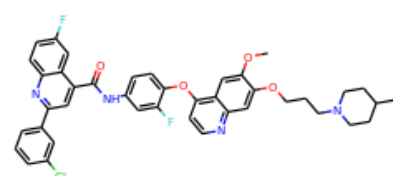

CHEMBL2392819

(<https://pubchem.ncbi.nlm.nih.gov/compound/CHEMBL2392819>)

ic50 = 1.65 nM

simil = 0.875

DAY

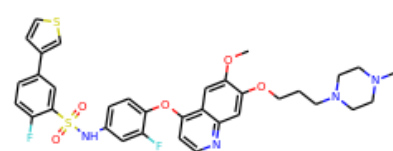

CHEMBL3263965

(<https://pubchem.ncbi.nlm.nih.gov/compound/CHEMBL3263965>)

ic50 = 1664.0 nM

simil = 0.820846905537

PAT

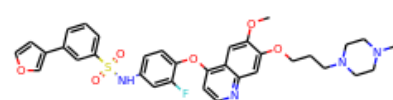

CHEMBL3263963

(<https://pubchem.ncbi.nlm.nih.gov/compound/CHEMBL3263963>)

ic50 = 1048.0 nM

simil = 0.919871794872

PAIR

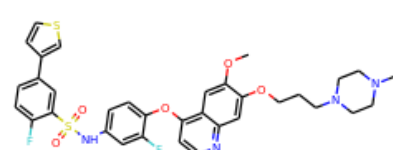

CHEMBL3263965

(<https://pubchem.ncbi.nlm.nih.gov/compound/CHEMBL3263965>)

ic50 = 1664.0 nM

simil = 0.662983425414

|       |                                                                                     |                                                                                                                                                                                                                   |
|-------|-------------------------------------------------------------------------------------|-------------------------------------------------------------------------------------------------------------------------------------------------------------------------------------------------------------------|
| TORS  | 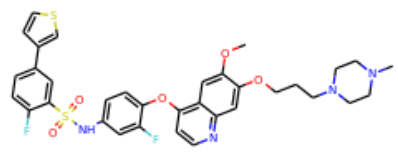   | <p><u>CHEMBL3263965</u><br/> <a href="https://pubchem.ncbi.nlm.nih.gov/compound/CHEMBL3263965">.https://pubchem.ncbi.nlm.nih.gov/compound/CHEMBL3263965</a><br/> ic50 = 1664.0 nM<br/> simil = 0.775862068966</p> |
| FP2   |    | <p><u>CHEMBL3263966</u><br/> <a href="https://pubchem.ncbi.nlm.nih.gov/compound/CHEMBL3263966">.https://pubchem.ncbi.nlm.nih.gov/compound/CHEMBL3263966</a><br/> ic50 = 1225.0 nM<br/> simil = 0.724137931034</p> |
| PUB   |    | <p><u>CHEMBL3263968</u><br/> <a href="https://pubchem.ncbi.nlm.nih.gov/compound/CHEMBL3263968">.https://pubchem.ncbi.nlm.nih.gov/compound/CHEMBL3263968</a><br/> ic50 = 2708.0 nM<br/> simil = 0.9</p>            |
| MACCS |  | <p><u>CHEMBL3263964</u><br/> <a href="https://pubchem.ncbi.nlm.nih.gov/compound/CHEMBL3263964">.https://pubchem.ncbi.nlm.nih.gov/compound/CHEMBL3263964</a><br/> ic50 = 398.0 nM<br/> simil = 0.931034482759</p>  |
| KR    |  | <p><u>CHEMBL3343388</u><br/> <a href="https://pubchem.ncbi.nlm.nih.gov/compound/CHEMBL3343388">.https://pubchem.ncbi.nlm.nih.gov/compound/CHEMBL3343388</a><br/> ic50 = 3.45 nM<br/> simil = 0.705882352941</p>   |
| GRAPH |  | <p><u>CHEMBL3263966</u><br/> <a href="https://pubchem.ncbi.nlm.nih.gov/compound/CHEMBL3263966">.https://pubchem.ncbi.nlm.nih.gov/compound/CHEMBL3263966</a><br/> ic50 = 1225.0 nM<br/> simil = 0.861111111111</p> |
| SUB   |  | <p><u>CHEMBL2419669</u><br/> <a href="https://pubchem.ncbi.nlm.nih.gov/compound/CHEMBL2419669">.https://pubchem.ncbi.nlm.nih.gov/compound/CHEMBL2419669</a><br/> ic50 = 1.4 nM<br/> simil = 0.857142857143</p>    |

HYB [. \(https://pubchem.ncbi.nlm.nih.gov/compound/CHEMBL3263963\).](https://pubchem.ncbi.nlm.nih.gov/compound/CHEMBL3263963)  
ic50 = 1048.0 nM  
simil = 0.844547563805

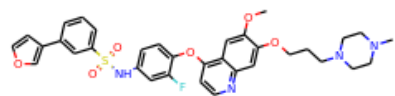

Epidermal growth factor receptor erbB1: ic50 = N.A.00 nM Score = 10.57

Best Fingerprints Similarity

ECFP2 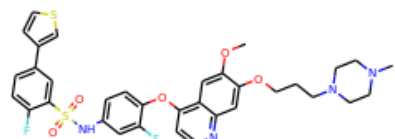 [CHEMBL3263965](https://pubchem.ncbi.nlm.nih.gov/compound/CHEMBL3263965)  
(<https://pubchem.ncbi.nlm.nih.gov/compound/CHEMBL3263965>)  
ic50 = 572.0 nM  
simil = 0.723404255319

FCFP2 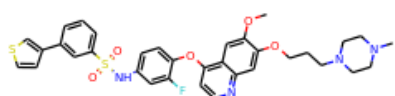 [CHEMBL3263964](https://pubchem.ncbi.nlm.nih.gov/compound/CHEMBL3263964)  
(<https://pubchem.ncbi.nlm.nih.gov/compound/CHEMBL3263964>)  
ic50 = 94.0 nM  
simil = 0.870967741935

DAY 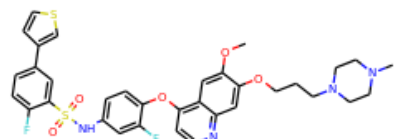 [CHEMBL3263965](https://pubchem.ncbi.nlm.nih.gov/compound/CHEMBL3263965)  
(<https://pubchem.ncbi.nlm.nih.gov/compound/CHEMBL3263965>)  
ic50 = 572.0 nM  
simil = 0.820846905537

PAT 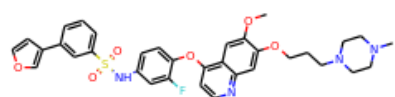 [CHEMBL3263963](https://pubchem.ncbi.nlm.nih.gov/compound/CHEMBL3263963)  
(<https://pubchem.ncbi.nlm.nih.gov/compound/CHEMBL3263963>)  
ic50 = 168.0 nM  
simil = 0.919871794872

PAIR 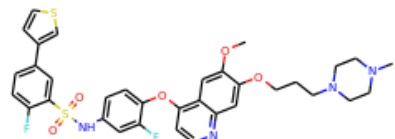 [CHEMBL3263965](https://pubchem.ncbi.nlm.nih.gov/compound/CHEMBL3263965)  
(<https://pubchem.ncbi.nlm.nih.gov/compound/CHEMBL3263965>)  
ic50 = 572.0 nM  
simil = 0.662983425414

TORS 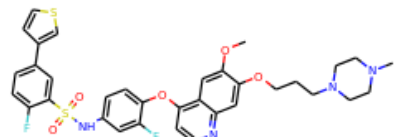 [CHEMBL3263965](https://pubchem.ncbi.nlm.nih.gov/compound/CHEMBL3263965)  
(<https://pubchem.ncbi.nlm.nih.gov/compound/CHEMBL3263965>)  
ic50 = 572.0 nM  
simil = 0.775862068966

|       |                                                                                     |                                                                                                                                                                                                                     |
|-------|-------------------------------------------------------------------------------------|---------------------------------------------------------------------------------------------------------------------------------------------------------------------------------------------------------------------|
| FP2   | 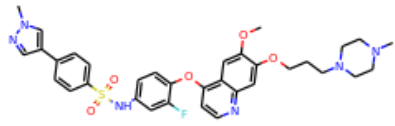   | <p><u>CHEMBL3263966</u><br/> <a href="https://pubchem.ncbi.nlm.nih.gov/compound/CHEMBL3263966">.https://pubchem.ncbi.nlm.nih.gov/compound/CHEMBL3263966</a><br/> ic50 = 4354.0 nM<br/> simil = 0.724137931034</p>   |
| PUB   |    | <p><u>CHEMBL3263968</u><br/> <a href="https://pubchem.ncbi.nlm.nih.gov/compound/CHEMBL3263968">.https://pubchem.ncbi.nlm.nih.gov/compound/CHEMBL3263968</a><br/> ic50 = 1052.0 nM<br/> simil = 0.9</p>              |
| MACCS |    | <p><u>CHEMBL3263964</u><br/> <a href="https://pubchem.ncbi.nlm.nih.gov/compound/CHEMBL3263964">.https://pubchem.ncbi.nlm.nih.gov/compound/CHEMBL3263964</a><br/> ic50 = 94.0 nM<br/> simil = 0.931034482759</p>     |
| KR    |  | <p><u>CHEMBL3263962</u><br/> <a href="https://pubchem.ncbi.nlm.nih.gov/compound/CHEMBL3263962">.https://pubchem.ncbi.nlm.nih.gov/compound/CHEMBL3263962</a><br/> ic50 = 84.0 nM<br/> simil = 0.67816091954</p>      |
| GRAPH |  | <p><u>CHEMBL3263966</u><br/> <a href="https://pubchem.ncbi.nlm.nih.gov/compound/CHEMBL3263966">.https://pubchem.ncbi.nlm.nih.gov/compound/CHEMBL3263966</a><br/> ic50 = 4354.0 nM<br/> simil = 0.861111111111</p>   |
| SUB   |  | <p><u>CHEMBL2419669</u><br/> <a href="https://pubchem.ncbi.nlm.nih.gov/compound/CHEMBL2419669">.https://pubchem.ncbi.nlm.nih.gov/compound/CHEMBL2419669</a><br/> ic50 = 100000.0 nM<br/> simil = 0.857142857143</p> |
| HYB   |  | <p><u>CHEMBL3263963</u><br/> <a href="https://pubchem.ncbi.nlm.nih.gov/compound/CHEMBL3263963">.https://pubchem.ncbi.nlm.nih.gov/compound/CHEMBL3263963</a><br/> ic50 = 168.0 nM<br/> simil = 0.844547563805</p>    |

Insulin receptor: ic50 = 10087.4421 nM Score = 9.7129

Best Fingerprints Similarity



|       |                                                                                     |                                                                                                                                                                                                                       |
|-------|-------------------------------------------------------------------------------------|-----------------------------------------------------------------------------------------------------------------------------------------------------------------------------------------------------------------------|
| ECFP2 | 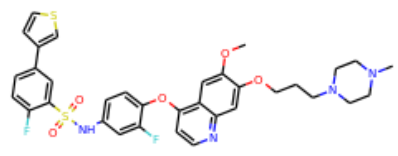   | <p><u>CHEMBL3263965</u><br/> <a href="https://pubchem.ncbi.nlm.nih.gov/compound/CHEMBL3263965">. (https://pubchem.ncbi.nlm.nih.gov/compound/CHEMBL3263965)</a><br/> ic50 = 11805.0 nM<br/> simil = 0.723404255319</p> |
| FCFP2 |    | <p><u>CHEMBL3263964</u><br/> <a href="https://pubchem.ncbi.nlm.nih.gov/compound/CHEMBL3263964">. (https://pubchem.ncbi.nlm.nih.gov/compound/CHEMBL3263964)</a><br/> ic50 = 2872.0 nM<br/> simil = 0.870967741935</p>  |
| DAY   |    | <p><u>CHEMBL3263965</u><br/> <a href="https://pubchem.ncbi.nlm.nih.gov/compound/CHEMBL3263965">. (https://pubchem.ncbi.nlm.nih.gov/compound/CHEMBL3263965)</a><br/> ic50 = 11805.0 nM<br/> simil = 0.820846905537</p> |
| PAT   |  | <p><u>CHEMBL3263963</u><br/> <a href="https://pubchem.ncbi.nlm.nih.gov/compound/CHEMBL3263963">. (https://pubchem.ncbi.nlm.nih.gov/compound/CHEMBL3263963)</a><br/> ic50 = 5228.0 nM<br/> simil = 0.919871794872</p>  |
| PAIR  |  | <p><u>CHEMBL3263965</u><br/> <a href="https://pubchem.ncbi.nlm.nih.gov/compound/CHEMBL3263965">. (https://pubchem.ncbi.nlm.nih.gov/compound/CHEMBL3263965)</a><br/> ic50 = 11805.0 nM<br/> simil = 0.662983425414</p> |
| TORS  |  | <p><u>CHEMBL3263965</u><br/> <a href="https://pubchem.ncbi.nlm.nih.gov/compound/CHEMBL3263965">. (https://pubchem.ncbi.nlm.nih.gov/compound/CHEMBL3263965)</a><br/> ic50 = 11805.0 nM<br/> simil = 0.775862068966</p> |
| FP2   |  | <p><u>CHEMBL3263966</u><br/> <a href="https://pubchem.ncbi.nlm.nih.gov/compound/CHEMBL3263966">. (https://pubchem.ncbi.nlm.nih.gov/compound/CHEMBL3263966)</a><br/> ic50 = 12500.0 nM<br/> simil = 0.724137931034</p> |
| PUB   |                                                                                     | <p><u>CHEMBL3263968</u><br/> <a href="https://pubchem.ncbi.nlm.nih.gov/compound/CHEMBL3263968">. (https://pubchem.ncbi.nlm.nih.gov/compound/CHEMBL3263968)</a><br/> ic50 = 12500.0 nM<br/> simil = 0.9</p>            |

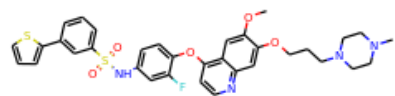

MACCS

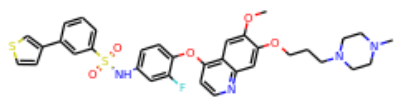

CHEMBL3263964

(<https://pubchem.ncbi.nlm.nih.gov/compound/CHEMBL3263964>)

ic50 = 2872.0 nM

simil = 0.931034482759

CHEMBL3263962

(<https://pubchem.ncbi.nlm.nih.gov/compound/CHEMBL3263962>)

ic50 = 7867.0 nM

simil = 0.67816091954

CHEMBL3263966

(<https://pubchem.ncbi.nlm.nih.gov/compound/CHEMBL3263966>)

ic50 = 12500.0 nM

simil = 0.861111111111

CHEMBL2403833

(<https://pubchem.ncbi.nlm.nih.gov/compound/CHEMBL2403833>)

ic50 = 339.0 nM

simil = 0.85

CHEMBL3263963

(<https://pubchem.ncbi.nlm.nih.gov/compound/CHEMBL3263963>)

ic50 = 5228.0 nM

simil = 0.844547563805

Epidermal growth factor receptor: ic50 = N.A.00 nM Score = 9.7129

Best Fingerprints Similarity

ECFP2

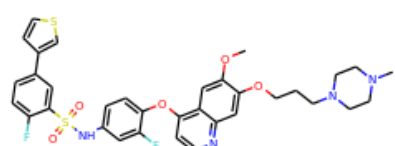

CHEMBL3263965

(<https://pubchem.ncbi.nlm.nih.gov/compound/CHEMBL3263965>)

ic50 = 578.0 nM

simil = 0.723404255319



|       |                                                                                     |                                                                                                                                                                                                                   |
|-------|-------------------------------------------------------------------------------------|-------------------------------------------------------------------------------------------------------------------------------------------------------------------------------------------------------------------|
| FCFP2 | 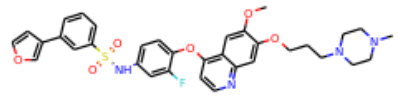   | <p><u>CHEMBL3263963</u><br/> <a href="https://pubchem.ncbi.nlm.nih.gov/compound/CHEMBL3263963">.https://pubchem.ncbi.nlm.nih.gov/compound/CHEMBL3263963</a><br/> ic50 = 283.0 nM<br/> simil = 0.870967741935</p>  |
| DAY   |    | <p><u>CHEMBL3263965</u><br/> <a href="https://pubchem.ncbi.nlm.nih.gov/compound/CHEMBL3263965">.https://pubchem.ncbi.nlm.nih.gov/compound/CHEMBL3263965</a><br/> ic50 = 578.0 nM<br/> simil = 0.820846905537</p>  |
| PAT   |    | <p><u>CHEMBL3263963</u><br/> <a href="https://pubchem.ncbi.nlm.nih.gov/compound/CHEMBL3263963">.https://pubchem.ncbi.nlm.nih.gov/compound/CHEMBL3263963</a><br/> ic50 = 283.0 nM<br/> simil = 0.919871794872</p>  |
| PAIR  |  | <p><u>CHEMBL3263965</u><br/> <a href="https://pubchem.ncbi.nlm.nih.gov/compound/CHEMBL3263965">.https://pubchem.ncbi.nlm.nih.gov/compound/CHEMBL3263965</a><br/> ic50 = 578.0 nM<br/> simil = 0.662983425414</p>  |
| TORS  |  | <p><u>CHEMBL3263965</u><br/> <a href="https://pubchem.ncbi.nlm.nih.gov/compound/CHEMBL3263965">.https://pubchem.ncbi.nlm.nih.gov/compound/CHEMBL3263965</a><br/> ic50 = 578.0 nM<br/> simil = 0.775862068966</p>  |
| FP2   |  | <p><u>CHEMBL3263966</u><br/> <a href="https://pubchem.ncbi.nlm.nih.gov/compound/CHEMBL3263966">.https://pubchem.ncbi.nlm.nih.gov/compound/CHEMBL3263966</a><br/> ic50 = 7538.0 nM<br/> simil = 0.724137931034</p> |
| PUB   |  | <p><u>CHEMBL3263968</u><br/> <a href="https://pubchem.ncbi.nlm.nih.gov/compound/CHEMBL3263968">.https://pubchem.ncbi.nlm.nih.gov/compound/CHEMBL3263968</a><br/> ic50 = 1157.0 nM<br/> simil = 0.9</p>            |
| MACCS |                                                                                     | <p><u>CHEMBL3263963</u><br/> <a href="https://pubchem.ncbi.nlm.nih.gov/compound/CHEMBL3263963">.https://pubchem.ncbi.nlm.nih.gov/compound/CHEMBL3263963</a><br/> ic50 = 283.0 nM<br/> simil = 0.931034482759</p>  |



CHEMBL3263962

KR

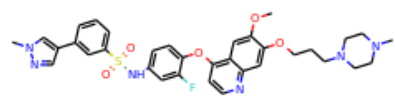

(<https://pubchem.ncbi.nlm.nih.gov/compound/CHEMBL3263962>)

ic50 = 369.0 nM  
simil = 0.67816091954

CHEMBL3263966

GRAPH

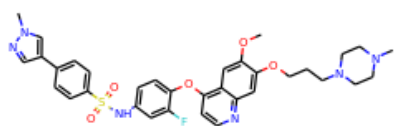

(<https://pubchem.ncbi.nlm.nih.gov/compound/CHEMBL3263966>)

ic50 = 7538.0 nM  
simil = 0.861111111111

CHEMBL3263963

SUB

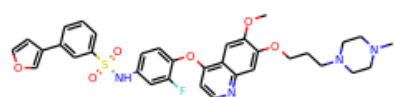

(<https://pubchem.ncbi.nlm.nih.gov/compound/CHEMBL3263963>)

ic50 = 283.0 nM  
simil = 0.85

CHEMBL3263963

HYB

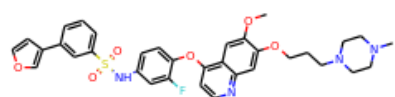

(<https://pubchem.ncbi.nlm.nih.gov/compound/CHEMBL3263963>)

ic50 = 283.0 nM  
simil = 0.844547563805

Vascular endothelial growth factor receptor 2: ic50 = 415.1417 nM Score = 5.9035

Best Fingerprints Similarity

CHEMBL2419669

ECFP2

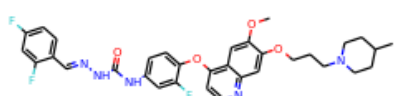

(<https://pubchem.ncbi.nlm.nih.gov/compound/CHEMBL2419669>)

ic50 = 690.0 nM  
simil = 0.666666666667

CHEMBL2419669

FCFP2

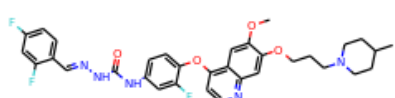

(<https://pubchem.ncbi.nlm.nih.gov/compound/CHEMBL2419669>)

ic50 = 690.0 nM  
simil = 0.848484848485

|       |                                                                                     |                                                                                                                                                                                                                      |
|-------|-------------------------------------------------------------------------------------|----------------------------------------------------------------------------------------------------------------------------------------------------------------------------------------------------------------------|
| DAY   | 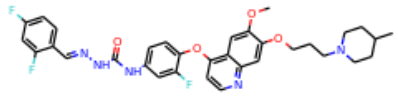   | <p><u>CHEMBL2419669</u><br/> <a href="https://pubchem.ncbi.nlm.nih.gov/compound/CHEMBL2419669">. (https://pubchem.ncbi.nlm.nih.gov/compound/CHEMBL2419669)</a><br/> ic50 = 690.0 nM<br/> simil = 0.658360128617</p>  |
| PAT   |    | <p><u>CHEMBL1230609</u><br/> <a href="https://pubchem.ncbi.nlm.nih.gov/compound/CHEMBL1230609">. (https://pubchem.ncbi.nlm.nih.gov/compound/CHEMBL1230609)</a><br/> ic50 = 0.8 nM<br/> simil = 0.855784469097</p>    |
| PAIR  |    | <p><u>CHEMBL2435999</u><br/> <a href="https://pubchem.ncbi.nlm.nih.gov/compound/CHEMBL2435999">. (https://pubchem.ncbi.nlm.nih.gov/compound/CHEMBL2435999)</a><br/> ic50 = 531.9 nM<br/> simil = 0.560798548094</p>  |
| TORS  |  | <p><u>CHEMBL2419669</u><br/> <a href="https://pubchem.ncbi.nlm.nih.gov/compound/CHEMBL2419669">. (https://pubchem.ncbi.nlm.nih.gov/compound/CHEMBL2419669)</a><br/> ic50 = 690.0 nM<br/> simil = 0.606557377049</p>  |
| FP2   |  | <p><u>CHEMBL1230609</u><br/> <a href="https://pubchem.ncbi.nlm.nih.gov/compound/CHEMBL1230609">. (https://pubchem.ncbi.nlm.nih.gov/compound/CHEMBL1230609)</a><br/> ic50 = 0.8 nM<br/> simil = 0.519337016575</p>    |
| PUB   |  | <p><u>CHEMBL178276</u><br/> <a href="https://pubchem.ncbi.nlm.nih.gov/compound/CHEMBL178276">. (https://pubchem.ncbi.nlm.nih.gov/compound/CHEMBL178276)</a><br/> ic50 = 100.0 nM<br/> simil = 0.880184331797</p>     |
| MACCS |  | <p><u>CHEMBL2387003</u><br/> <a href="https://pubchem.ncbi.nlm.nih.gov/compound/CHEMBL2387003">. (https://pubchem.ncbi.nlm.nih.gov/compound/CHEMBL2387003)</a><br/> ic50 = 3000.0 nM<br/> simil = 0.771739130435</p> |
| KR    |                                                                                     | <p><u>CHEMBL2058042</u><br/> <a href="https://pubchem.ncbi.nlm.nih.gov/compound/CHEMBL2058042">. (https://pubchem.ncbi.nlm.nih.gov/compound/CHEMBL2058042)</a><br/> ic50 = 40.0 nM<br/> simil = 0.627906976744</p>   |

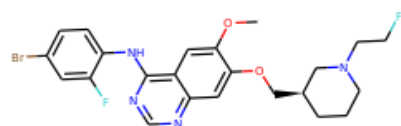

GRAPH

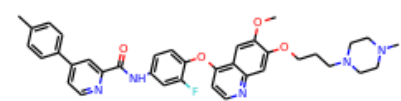

CHEMBL2435999

(<https://pubchem.ncbi.nlm.nih.gov/compound/CHEMBL2435999>)

ic50 = 531.9 nM

simil = 0.569506726457

SUB

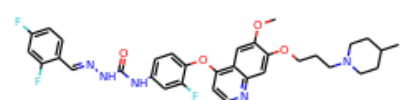

CHEMBL2419669

(<https://pubchem.ncbi.nlm.nih.gov/compound/CHEMBL2419669>)

ic50 = 690.0 nM

simil = 0.857142857143

HYB

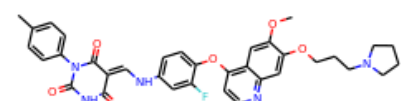

CHEMBL3116440

(<https://pubchem.ncbi.nlm.nih.gov/compound/CHEMBL3116440>)

ic50 = 384.1 nM

simil = 0.59918200409

Stem cell growth factor receptor: ic50 = 159.5597 nM Score = 5.2715

Best Fingerprints Similarity

ECFP2

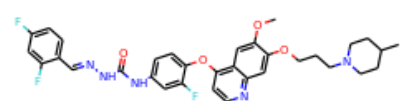

CHEMBL2419669

(<https://pubchem.ncbi.nlm.nih.gov/compound/CHEMBL2419669>)

ic50 = 230.0 nM

simil = 0.666666666667

FCFP2

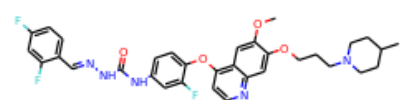

CHEMBL2419669

(<https://pubchem.ncbi.nlm.nih.gov/compound/CHEMBL2419669>)

ic50 = 230.0 nM

simil = 0.848484848485

DAY

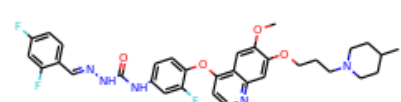

CHEMBL2419669

(<https://pubchem.ncbi.nlm.nih.gov/compound/CHEMBL2419669>)

ic50 = 230.0 nM

simil = 0.658360128617

PAT

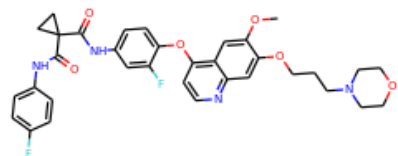

CHEMBL1230609  
(<https://pubchem.ncbi.nlm.nih.gov/compound/CHEMBL1230609>)  
ic50 = 4.0 nM  
simil = 0.855784469097

PAIR

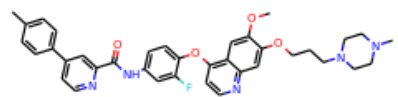

CHEMBL2435999  
(<https://pubchem.ncbi.nlm.nih.gov/compound/CHEMBL2435999>)  
ic50 = 449.7 nM  
simil = 0.560798548094

TORS

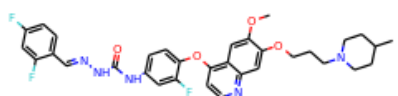

CHEMBL2419669  
(<https://pubchem.ncbi.nlm.nih.gov/compound/CHEMBL2419669>)  
ic50 = 230.0 nM  
simil = 0.606557377049

FP2

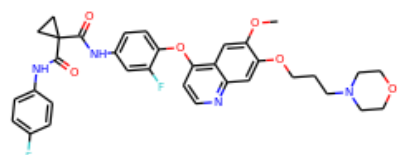

CHEMBL1230609  
(<https://pubchem.ncbi.nlm.nih.gov/compound/CHEMBL1230609>)  
ic50 = 4.0 nM  
simil = 0.519337016575

PUB

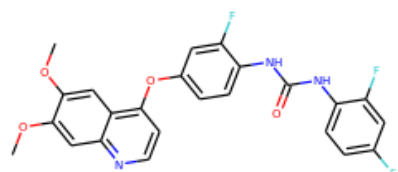

CHEMBL178455  
(<https://pubchem.ncbi.nlm.nih.gov/compound/CHEMBL178455>)  
ic50 = 40.0 nM  
simil = 0.876146788991

MACCS

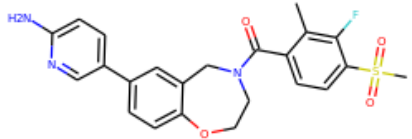

CHEMBL2333365  
(<https://pubchem.ncbi.nlm.nih.gov/compound/CHEMBL2333365>)  
ic50 = 3500.0 nM  
simil = 0.75

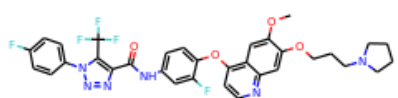

KR

CHEMBL3343366  
(<https://pubchem.ncbi.nlm.nih.gov/compound/CHEMBL3343366>)  
ic50 = 4.02 nM  
simil = 0.556818181818

GRAPH

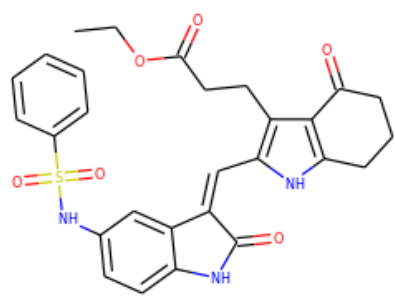

CHEMBL1215218  
(<https://pubchem.ncbi.nlm.nih.gov/compound/CHEMBL1215218>)  
ic50 = 1000.0 nM  
simil = 0.601809954751

SUB

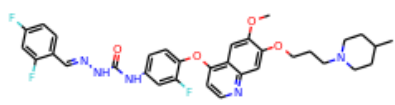

CHEMBL2419669  
(<https://pubchem.ncbi.nlm.nih.gov/compound/CHEMBL2419669>)  
ic50 = 230.0 nM  
simil = 0.857142857143

HYB

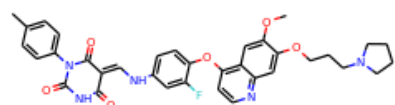

CHEMBL3116440  
(<https://pubchem.ncbi.nlm.nih.gov/compound/CHEMBL3116440>)  
ic50 = 652.5 nM  
simil = 0.59918200409

Tyrosine-protein kinase receptor FLT3: ic50 = 196.1184 nM Score = 5.2632

Best Fingerprints Similarity

ECFP2

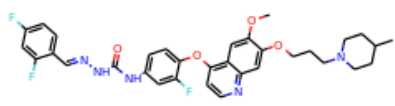

CHEMBL2419669  
(<https://pubchem.ncbi.nlm.nih.gov/compound/CHEMBL2419669>)  
ic50 = 380.0 nM  
simil = 0.666666666667

FCFP2

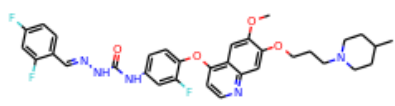

CHEMBL2419669  
(<https://pubchem.ncbi.nlm.nih.gov/compound/CHEMBL2419669>)  
ic50 = 380.0 nM  
simil = 0.848484848485

DAY

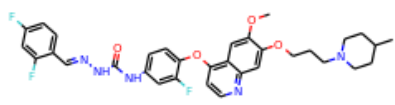

CHEMBL2419669  
(<https://pubchem.ncbi.nlm.nih.gov/compound/CHEMBL2419669>)  
ic50 = 380.0 nM  
simil = 0.658360128617

PAT

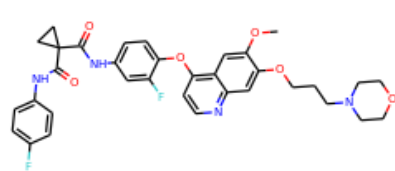

CHEMBL1230609  
(<https://pubchem.ncbi.nlm.nih.gov/compound/CHEMBL1230609>)  
ic50 = 5.58 nM  
simil = 0.855784469097



|       |                                                                                     |                                                                                                                                                                                                                  |
|-------|-------------------------------------------------------------------------------------|------------------------------------------------------------------------------------------------------------------------------------------------------------------------------------------------------------------|
| PAIR  | 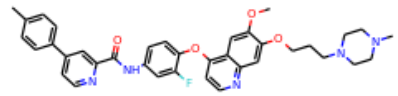   | <p><u>CHEMBL2435999</u><br/> <a href="https://pubchem.ncbi.nlm.nih.gov/compound/CHEMBL2435999">.https://pubchem.ncbi.nlm.nih.gov/compound/CHEMBL2435999</a><br/> ic50 = 1.08 nM<br/> simil = 0.560798548094</p>  |
| TORS  |    | <p><u>CHEMBL2419669</u><br/> <a href="https://pubchem.ncbi.nlm.nih.gov/compound/CHEMBL2419669">.https://pubchem.ncbi.nlm.nih.gov/compound/CHEMBL2419669</a><br/> ic50 = 380.0 nM<br/> simil = 0.606557377049</p> |
| FP2   |    | <p><u>CHEMBL1230609</u><br/> <a href="https://pubchem.ncbi.nlm.nih.gov/compound/CHEMBL1230609">.https://pubchem.ncbi.nlm.nih.gov/compound/CHEMBL1230609</a><br/> ic50 = 5.58 nM<br/> simil = 0.519337016575</p>  |
| PUB   |  | <p><u>CHEMBL2419669</u><br/> <a href="https://pubchem.ncbi.nlm.nih.gov/compound/CHEMBL2419669">.https://pubchem.ncbi.nlm.nih.gov/compound/CHEMBL2419669</a><br/> ic50 = 380.0 nM<br/> simil = 0.867841409692</p> |
| MACCS |  | <p><u>CHEMBL3326004</u><br/> <a href="https://pubchem.ncbi.nlm.nih.gov/compound/CHEMBL3326004">.https://pubchem.ncbi.nlm.nih.gov/compound/CHEMBL3326004</a><br/> ic50 = 1.2 nM<br/> simil = 0.770833333333</p>   |
| KR    |  | <p><u>CHEMBL3343366</u><br/> <a href="https://pubchem.ncbi.nlm.nih.gov/compound/CHEMBL3343366">.https://pubchem.ncbi.nlm.nih.gov/compound/CHEMBL3343366</a><br/> ic50 = 8.78 nM<br/> simil = 0.556818181818</p>  |
| GRAPH |  | <p><u>CHEMBL2435999</u><br/> <a href="https://pubchem.ncbi.nlm.nih.gov/compound/CHEMBL2435999">.https://pubchem.ncbi.nlm.nih.gov/compound/CHEMBL2435999</a><br/> ic50 = 1.08 nM<br/> simil = 0.569506726457</p>  |

SUB  [CHEMBL2419669](https://pubchem.ncbi.nlm.nih.gov/compound/CHEMBL2419669)  
(<https://pubchem.ncbi.nlm.nih.gov/compound/CHEMBL2419669>)  
ic50 = 380.0 nM  
simil = 0.857142857143

HYB  [CHEMBL3116440](https://pubchem.ncbi.nlm.nih.gov/compound/CHEMBL3116440)  
(<https://pubchem.ncbi.nlm.nih.gov/compound/CHEMBL3116440>)  
ic50 = 496.3 nM  
simil = 0.59918200409

Platelet-derived growth factor receptor alpha: ic50 = N.A.00 nM Score = 5.2585

Best Fingerprints Similarity

ECFP2 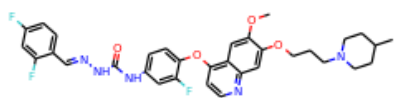 [CHEMBL2419669](https://pubchem.ncbi.nlm.nih.gov/compound/CHEMBL2419669)  
(<https://pubchem.ncbi.nlm.nih.gov/compound/CHEMBL2419669>)  
ic50 = 390.0 nM  
simil = 0.666666666667

FCFP2 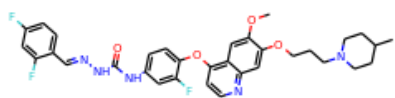 [CHEMBL2419669](https://pubchem.ncbi.nlm.nih.gov/compound/CHEMBL2419669)  
(<https://pubchem.ncbi.nlm.nih.gov/compound/CHEMBL2419669>)  
ic50 = 390.0 nM  
simil = 0.848484848485

DAY  [CHEMBL2419669](https://pubchem.ncbi.nlm.nih.gov/compound/CHEMBL2419669)  
(<https://pubchem.ncbi.nlm.nih.gov/compound/CHEMBL2419669>)  
ic50 = 390.0 nM  
simil = 0.658360128617

PAT  [CHEMBL2419669](https://pubchem.ncbi.nlm.nih.gov/compound/CHEMBL2419669)  
(<https://pubchem.ncbi.nlm.nih.gov/compound/CHEMBL2419669>)  
ic50 = 390.0 nM  
simil = 0.850406504065

PAIR  [CHEMBL2419669](https://pubchem.ncbi.nlm.nih.gov/compound/CHEMBL2419669)  
(<https://pubchem.ncbi.nlm.nih.gov/compound/CHEMBL2419669>)  
ic50 = 390.0 nM  
simil = 0.549152542373

|       |                                                                                     |                                                                                                                                                                                                                     |
|-------|-------------------------------------------------------------------------------------|---------------------------------------------------------------------------------------------------------------------------------------------------------------------------------------------------------------------|
| TORS  | 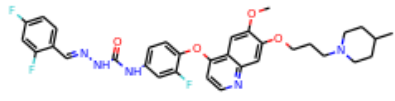   | <p><u>CHEMBL2419669</u><br/> <a href="https://pubchem.ncbi.nlm.nih.gov/compound/CHEMBL2419669">. (https://pubchem.ncbi.nlm.nih.gov/compound/CHEMBL2419669)</a><br/> ic50 = 390.0 nM<br/> simil = 0.606557377049</p> |
| FP2   |    | <p><u>CHEMBL2419669</u><br/> <a href="https://pubchem.ncbi.nlm.nih.gov/compound/CHEMBL2419669">. (https://pubchem.ncbi.nlm.nih.gov/compound/CHEMBL2419669)</a><br/> ic50 = 390.0 nM<br/> simil = 0.515463917526</p> |
| PUB   |    | <p><u>CHEMBL178276</u><br/> <a href="https://pubchem.ncbi.nlm.nih.gov/compound/CHEMBL178276">. (https://pubchem.ncbi.nlm.nih.gov/compound/CHEMBL178276)</a><br/> ic50 = 52.0 nM<br/> simil = 0.880184331797</p>     |
| MACCS |  | <p><u>CHEMBL1822792</u><br/> <a href="https://pubchem.ncbi.nlm.nih.gov/compound/CHEMBL1822792">. (https://pubchem.ncbi.nlm.nih.gov/compound/CHEMBL1822792)</a><br/> ic50 = 100.0 nM<br/> simil = 0.715789473684</p> |
| KR    |  | <p><u>CHEMBL2419669</u><br/> <a href="https://pubchem.ncbi.nlm.nih.gov/compound/CHEMBL2419669">. (https://pubchem.ncbi.nlm.nih.gov/compound/CHEMBL2419669)</a><br/> ic50 = 390.0 nM<br/> simil = 0.545454545455</p> |
| GRAPH |  | <p><u>CHEMBL179815</u><br/> <a href="https://pubchem.ncbi.nlm.nih.gov/compound/CHEMBL179815">. (https://pubchem.ncbi.nlm.nih.gov/compound/CHEMBL179815)</a><br/> ic50 = 17.0 nM<br/> simil = 0.535398230088</p>     |
| SUB   |  | <p><u>CHEMBL2419669</u><br/> <a href="https://pubchem.ncbi.nlm.nih.gov/compound/CHEMBL2419669">. (https://pubchem.ncbi.nlm.nih.gov/compound/CHEMBL2419669)</a><br/> ic50 = 390.0 nM<br/> simil = 0.857142857143</p> |
| HYB   |                                                                                     | <p><u>CHEMBL2419669</u><br/> <a href="https://pubchem.ncbi.nlm.nih.gov/compound/CHEMBL2419669">. (https://pubchem.ncbi.nlm.nih.gov/compound/CHEMBL2419669)</a><br/> ic50 = 390.0 nM<br/> simil = 0.592827004219</p> |

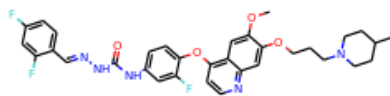

Macrophage-stimulating protein receptor: ic50 = 11.3273 nM Score = 5.2516

Best Fingerprints Similarity

ECFP2 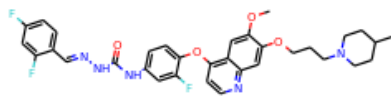 [CHEMBL2419669](https://pubchem.ncbi.nlm.nih.gov/compound/CHEMBL2419669)  
(<https://pubchem.ncbi.nlm.nih.gov/compound/CHEMBL2419669>)  
ic50 = 18.7 nM  
simil = 0.666666666667

FCFP2 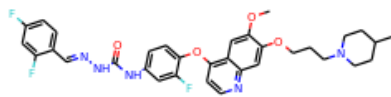 [CHEMBL2419669](https://pubchem.ncbi.nlm.nih.gov/compound/CHEMBL2419669)  
(<https://pubchem.ncbi.nlm.nih.gov/compound/CHEMBL2419669>)  
ic50 = 18.7 nM  
simil = 0.848484848485

DAY 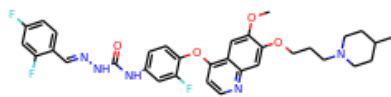 [CHEMBL2419669](https://pubchem.ncbi.nlm.nih.gov/compound/CHEMBL2419669)  
(<https://pubchem.ncbi.nlm.nih.gov/compound/CHEMBL2419669>)  
ic50 = 18.7 nM  
simil = 0.658360128617

PAT 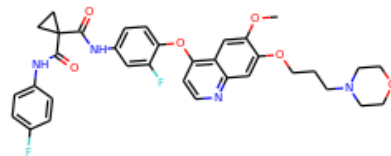 [CHEMBL1230609](https://pubchem.ncbi.nlm.nih.gov/compound/CHEMBL1230609)  
(<https://pubchem.ncbi.nlm.nih.gov/compound/CHEMBL1230609>)  
ic50 = 3.43 nM  
simil = 0.855784469097

PAIR 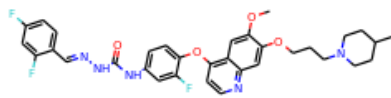 [CHEMBL2419669](https://pubchem.ncbi.nlm.nih.gov/compound/CHEMBL2419669)  
(<https://pubchem.ncbi.nlm.nih.gov/compound/CHEMBL2419669>)  
ic50 = 18.7 nM  
simil = 0.549152542373

TORS 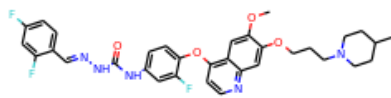 [CHEMBL2419669](https://pubchem.ncbi.nlm.nih.gov/compound/CHEMBL2419669)  
(<https://pubchem.ncbi.nlm.nih.gov/compound/CHEMBL2419669>)  
ic50 = 18.7 nM  
simil = 0.606557377049

FP2

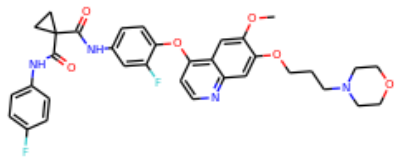

CHEMBL1230609  
(<https://pubchem.ncbi.nlm.nih.gov/compound/CHEMBL1230609>)  
ic50 = 3.43 nM  
simil = 0.519337016575

PUB

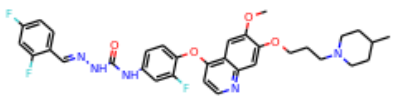

CHEMBL2419669  
(<https://pubchem.ncbi.nlm.nih.gov/compound/CHEMBL2419669>)  
ic50 = 18.7 nM  
simil = 0.867841409692

MACCS

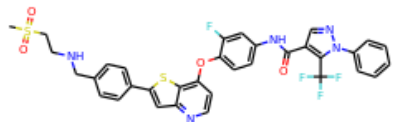

CHEMBL1095036  
(<https://pubchem.ncbi.nlm.nih.gov/compound/CHEMBL1095036>)  
ic50 = 80.0 nM  
simil = 0.747368421053

KR

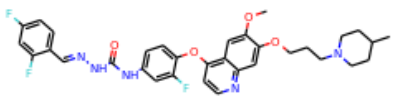

CHEMBL2419669  
(<https://pubchem.ncbi.nlm.nih.gov/compound/CHEMBL2419669>)  
ic50 = 18.7 nM  
simil = 0.545454545455

GRAPH

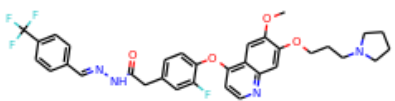

CHEMBL3339360  
(<https://pubchem.ncbi.nlm.nih.gov/compound/CHEMBL3339360>)  
ic50 = 28.6 nM  
simil = 0.565610859729

SUB

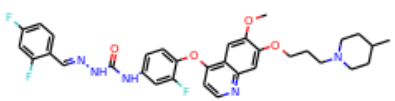

CHEMBL2419669  
(<https://pubchem.ncbi.nlm.nih.gov/compound/CHEMBL2419669>)  
ic50 = 18.7 nM  
simil = 0.857142857143

HYB

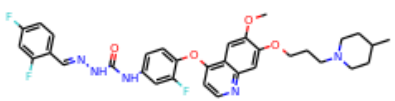

CHEMBL2419669  
(<https://pubchem.ncbi.nlm.nih.gov/compound/CHEMBL2419669>)  
ic50 = 18.7 nM  
simil = 0.592827004219

Vascular endothelial growth factor receptor 3: ic50 = N.A.00 nM Score = 4.1316

Best Fingerprints Similarity

|       |                                                                                     |                                                                                                                                                                                                                   |
|-------|-------------------------------------------------------------------------------------|-------------------------------------------------------------------------------------------------------------------------------------------------------------------------------------------------------------------|
| ECFP2 | 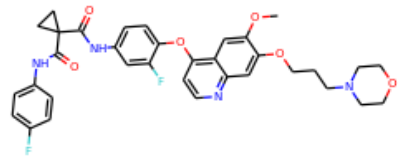   | <p><u>CHEMBL1230609</u><br/> <a href="https://pubchem.ncbi.nlm.nih.gov/compound/CHEMBL1230609">. (https://pubchem.ncbi.nlm.nih.gov/compound/CHEMBL1230609)</a><br/> ic50 = 2.8 nM<br/> simil = 0.588235294118</p> |
| FCFP2 |    | <p><u>CHEMBL1230609</u><br/> <a href="https://pubchem.ncbi.nlm.nih.gov/compound/CHEMBL1230609">. (https://pubchem.ncbi.nlm.nih.gov/compound/CHEMBL1230609)</a><br/> ic50 = 2.8 nM<br/> simil = 0.78125</p>        |
| DAY   |   | <p><u>CHEMBL1230609</u><br/> <a href="https://pubchem.ncbi.nlm.nih.gov/compound/CHEMBL1230609">. (https://pubchem.ncbi.nlm.nih.gov/compound/CHEMBL1230609)</a><br/> ic50 = 2.8 nM<br/> simil = 0.654251012146</p> |
| PAT   |  | <p><u>CHEMBL1230609</u><br/> <a href="https://pubchem.ncbi.nlm.nih.gov/compound/CHEMBL1230609">. (https://pubchem.ncbi.nlm.nih.gov/compound/CHEMBL1230609)</a><br/> ic50 = 2.8 nM<br/> simil = 0.855784469097</p> |
| PAIR  |  | <p><u>CHEMBL1230609</u><br/> <a href="https://pubchem.ncbi.nlm.nih.gov/compound/CHEMBL1230609">. (https://pubchem.ncbi.nlm.nih.gov/compound/CHEMBL1230609)</a><br/> ic50 = 2.8 nM<br/> simil = 0.482173174873</p> |
| TORS  |  | <p><u>CHEMBL1230609</u><br/> <a href="https://pubchem.ncbi.nlm.nih.gov/compound/CHEMBL1230609">. (https://pubchem.ncbi.nlm.nih.gov/compound/CHEMBL1230609)</a><br/> ic50 = 2.8 nM<br/> simil = 0.564516129032</p> |
| FP2   |  | <p><u>CHEMBL1230609</u><br/> <a href="https://pubchem.ncbi.nlm.nih.gov/compound/CHEMBL1230609">. (https://pubchem.ncbi.nlm.nih.gov/compound/CHEMBL1230609)</a><br/> ic50 = 2.8 nM<br/> simil = 0.519337016575</p> |



PUB

ic50 = 2.8 nM  
simil = 0.859649122807

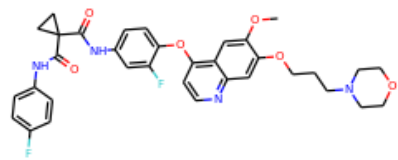

MACCS

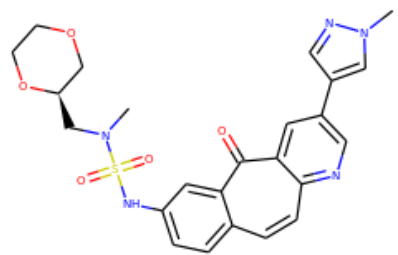

CHEMBL1822792  
(<https://pubchem.ncbi.nlm.nih.gov/compound/CHEMBL1822792>)  
ic50 = 78.0 nM  
simil = 0.715789473684

KR

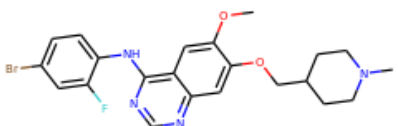

CHEMBL24828  
(<https://pubchem.ncbi.nlm.nih.gov/compound/CHEMBL24828>)  
ic50 = 233.0 nM  
simil = 0.522222222222

GRAPH

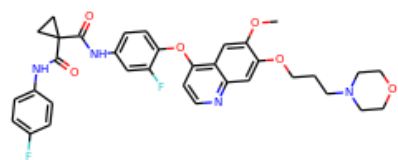

CHEMBL1230609  
(<https://pubchem.ncbi.nlm.nih.gov/compound/CHEMBL1230609>)  
ic50 = 2.8 nM  
simil = 0.545454545455

SUB

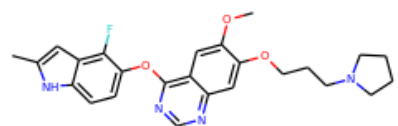

CHEMBL491473  
(<https://pubchem.ncbi.nlm.nih.gov/compound/CHEMBL491473>)  
ic50 = 3.0 nM  
simil = 0.8

HYB

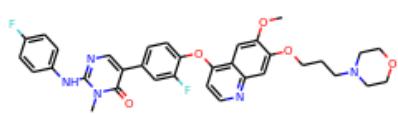

CHEMBL453737  
(<https://pubchem.ncbi.nlm.nih.gov/compound/CHEMBL453737>)  
ic50 = 5.0 nM  
simil = 0.555769230769

Vascular endothelial growth factor receptor 1: ic50 = N.A.00 nM Score = 4.1316

Best Fingerprints Similarity

ECFP2

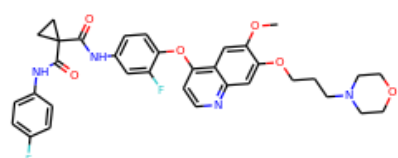

CHEMBL1230609  
(<https://pubchem.ncbi.nlm.nih.gov/compound/CHEMBL1230609>)  
ic50 = 0.8 nM  
simil = 0.588235294118

|       |                                                                                     |                                                                                                                                                                                                                |
|-------|-------------------------------------------------------------------------------------|----------------------------------------------------------------------------------------------------------------------------------------------------------------------------------------------------------------|
| FCFP2 | 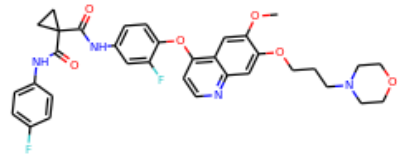   | <p><u>CHEMBL1230609</u><br/> <a href="https://pubchem.ncbi.nlm.nih.gov/compound/CHEMBL1230609">.https://pubchem.ncbi.nlm.nih.gov/compound/CHEMBL1230609</a><br/> ic50 = 0.8 nM<br/> simil = 0.78125</p>        |
| DAY   |    | <p><u>CHEMBL1230609</u><br/> <a href="https://pubchem.ncbi.nlm.nih.gov/compound/CHEMBL1230609">.https://pubchem.ncbi.nlm.nih.gov/compound/CHEMBL1230609</a><br/> ic50 = 0.8 nM<br/> simil = 0.654251012146</p> |
| PAT   |    | <p><u>CHEMBL1230609</u><br/> <a href="https://pubchem.ncbi.nlm.nih.gov/compound/CHEMBL1230609">.https://pubchem.ncbi.nlm.nih.gov/compound/CHEMBL1230609</a><br/> ic50 = 0.8 nM<br/> simil = 0.855784469097</p> |
| PAIR  |  | <p><u>CHEMBL1230609</u><br/> <a href="https://pubchem.ncbi.nlm.nih.gov/compound/CHEMBL1230609">.https://pubchem.ncbi.nlm.nih.gov/compound/CHEMBL1230609</a><br/> ic50 = 0.8 nM<br/> simil = 0.482173174873</p> |
| TORS  |  | <p><u>CHEMBL1230609</u><br/> <a href="https://pubchem.ncbi.nlm.nih.gov/compound/CHEMBL1230609">.https://pubchem.ncbi.nlm.nih.gov/compound/CHEMBL1230609</a><br/> ic50 = 0.8 nM<br/> simil = 0.564516129032</p> |
| FP2   |  | <p><u>CHEMBL1230609</u><br/> <a href="https://pubchem.ncbi.nlm.nih.gov/compound/CHEMBL1230609">.https://pubchem.ncbi.nlm.nih.gov/compound/CHEMBL1230609</a><br/> ic50 = 0.8 nM<br/> simil = 0.519337016575</p> |
| PUB   |  | <p><u>CHEMBL1230609</u><br/> <a href="https://pubchem.ncbi.nlm.nih.gov/compound/CHEMBL1230609">.https://pubchem.ncbi.nlm.nih.gov/compound/CHEMBL1230609</a><br/> ic50 = 0.8 nM<br/> simil = 0.859649122807</p> |

|       |                                                                                     |                                                                                                                                                                                                                                                                                   |
|-------|-------------------------------------------------------------------------------------|-----------------------------------------------------------------------------------------------------------------------------------------------------------------------------------------------------------------------------------------------------------------------------------|
| MACCS | 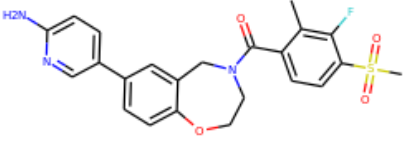   | <p><a href="https://pubchem.ncbi.nlm.nih.gov/compound/CHEMBL2333365">CHEMBL2333365</a><br/> <a href="https://pubchem.ncbi.nlm.nih.gov/compound/CHEMBL2333365">.(https://pubchem.ncbi.nlm.nih.gov/compound/CHEMBL2333365)</a><br/> ic50 = 3500.0 nM<br/> simil = 0.75</p>          |
| KR    |    | <p><a href="https://pubchem.ncbi.nlm.nih.gov/compound/CHEMBL1907764">CHEMBL1907764</a><br/> <a href="https://pubchem.ncbi.nlm.nih.gov/compound/CHEMBL1907764">.(https://pubchem.ncbi.nlm.nih.gov/compound/CHEMBL1907764)</a><br/> ic50 = 500.0 nM<br/> simil = 0.573033707865</p> |
| GRAPH |   | <p><a href="https://pubchem.ncbi.nlm.nih.gov/compound/CHEMBL1230609">CHEMBL1230609</a><br/> <a href="https://pubchem.ncbi.nlm.nih.gov/compound/CHEMBL1230609">.(https://pubchem.ncbi.nlm.nih.gov/compound/CHEMBL1230609)</a><br/> ic50 = 0.8 nM<br/> simil = 0.545454545455</p>   |
| SUB   |  | <p><a href="https://pubchem.ncbi.nlm.nih.gov/compound/CHEMBL281990">CHEMBL281990</a><br/> <a href="https://pubchem.ncbi.nlm.nih.gov/compound/CHEMBL281990">.(https://pubchem.ncbi.nlm.nih.gov/compound/CHEMBL281990)</a><br/> ic50 = 500.0 nM<br/> simil = 0.842105263158</p>     |
| HYB   |  | <p><a href="https://pubchem.ncbi.nlm.nih.gov/compound/CHEMBL453737">CHEMBL453737</a><br/> <a href="https://pubchem.ncbi.nlm.nih.gov/compound/CHEMBL453737">.(https://pubchem.ncbi.nlm.nih.gov/compound/CHEMBL453737)</a><br/> ic50 = 45.0 nM<br/> simil = 0.555769230769</p>      |

Proto-oncogene tyrosine-protein kinase ROS: ic50 = N.A.00 nM Score = 4.1316

Best Fingerprints Similarity

|       |                                                                                     |                                                                                                                                                                                                                                                                                  |
|-------|-------------------------------------------------------------------------------------|----------------------------------------------------------------------------------------------------------------------------------------------------------------------------------------------------------------------------------------------------------------------------------|
| ECFP2 | 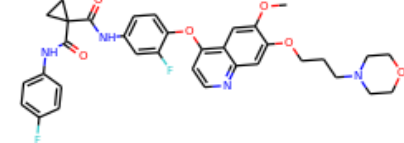 | <p><a href="https://pubchem.ncbi.nlm.nih.gov/compound/CHEMBL1230609">CHEMBL1230609</a><br/> <a href="https://pubchem.ncbi.nlm.nih.gov/compound/CHEMBL1230609">.(https://pubchem.ncbi.nlm.nih.gov/compound/CHEMBL1230609)</a><br/> ic50 = 10.0 nM<br/> simil = 0.588235294118</p> |
| FCFP2 |  | <p><a href="https://pubchem.ncbi.nlm.nih.gov/compound/CHEMBL1230609">CHEMBL1230609</a><br/> <a href="https://pubchem.ncbi.nlm.nih.gov/compound/CHEMBL1230609">.(https://pubchem.ncbi.nlm.nih.gov/compound/CHEMBL1230609)</a><br/> ic50 = 10.0 nM<br/> simil = 0.78125</p>        |

DAY

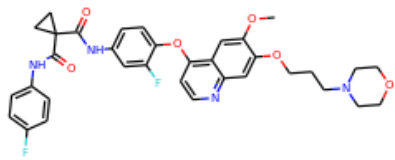

CHEMBL1230609  
(<https://pubchem.ncbi.nlm.nih.gov/compound/CHEMBL1230609>)  
ic50 = 10.0 nM  
simil = 0.654251012146

PAT



CHEMBL1230609  
(<https://pubchem.ncbi.nlm.nih.gov/compound/CHEMBL1230609>)  
ic50 = 10.0 nM  
simil = 0.855784469097

PAIR

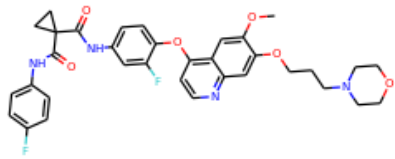

CHEMBL1230609  
(<https://pubchem.ncbi.nlm.nih.gov/compound/CHEMBL1230609>)  
ic50 = 10.0 nM  
simil = 0.482173174873

TORS

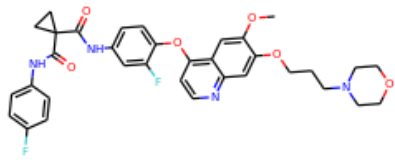

CHEMBL1230609  
(<https://pubchem.ncbi.nlm.nih.gov/compound/CHEMBL1230609>)  
ic50 = 10.0 nM  
simil = 0.564516129032

FP2

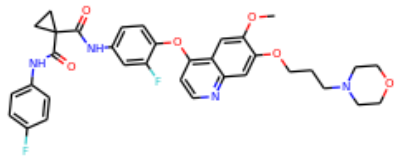

CHEMBL1230609  
(<https://pubchem.ncbi.nlm.nih.gov/compound/CHEMBL1230609>)  
ic50 = 10.0 nM  
simil = 0.519337016575

PUB

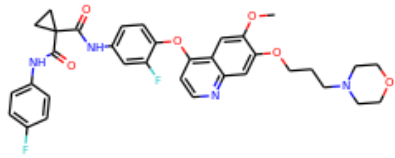

CHEMBL1230609  
(<https://pubchem.ncbi.nlm.nih.gov/compound/CHEMBL1230609>)  
ic50 = 10.0 nM  
simil = 0.859649122807

MACCS

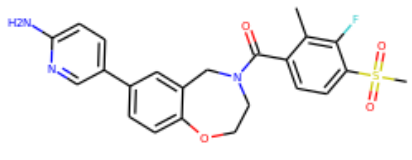

CHEMBL2333365  
(<https://pubchem.ncbi.nlm.nih.gov/compound/CHEMBL2333365>)  
ic50 = 10000.0 nM  
simil = 0.75

KR

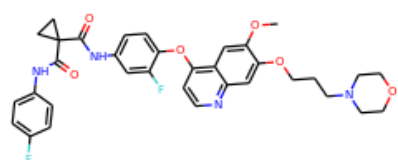

CHEMBL1230609  
(<https://pubchem.ncbi.nlm.nih.gov/compound/CHEMBL1230609>)  
ic50 = 10.0 nM  
simil = 0.456896551724

GRAPH

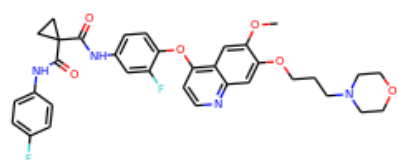

CHEMBL1230609  
(<https://pubchem.ncbi.nlm.nih.gov/compound/CHEMBL1230609>)  
ic50 = 10.0 nM  
simil = 0.545454545455

SUB

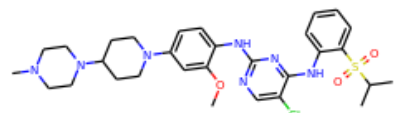

CHEMBL509032  
(<https://pubchem.ncbi.nlm.nih.gov/compound/CHEMBL509032>)  
ic50 = 2.0 nM  
simil = 0.681818181818

HYB

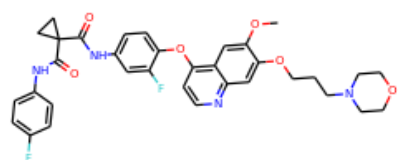

CHEMBL1230609  
(<https://pubchem.ncbi.nlm.nih.gov/compound/CHEMBL1230609>)  
ic50 = 10.0 nM  
simil = 0.549060542797
