# Supplementary material
Source: publisher figshare collection journal article supplement (https://acs.figshare.com/ndownloader/files/13834631)
Supplement: Supplementary file 18 [file 13834631]

# SwissTargetPrediction report:

## Reference:

Gfeller D., Michielin O. & Zoete V.  
Shaping the interaction landscape of  
bioactive molecules, *Bioinformatics*  
(2013) 29:3073-3079.

## Query Molecule

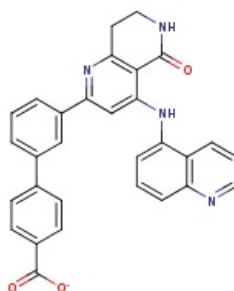

## Frequency of Target Class

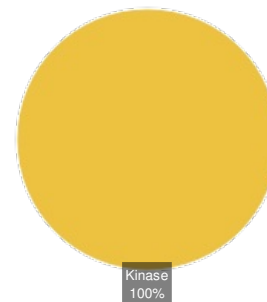

| Target                                              | Uniprot ID | Gene code | ChEMBL ID  | Probability            | # sim. cmpds (3D / 2D) | Target Class   |
|-----------------------------------------------------|------------|-----------|------------|------------------------|------------------------|----------------|
| MAP kinase-activated protein kinase 5               | Q8IW41     | MAPKAPK5  | CHEMBL3094 | <div><div></div></div> | 5 / 197                | Ser_Thr Kinase |
| MAP kinase-activated protein kinase 2               | P49137     | MAPKAPK2  | CHEMBL2208 | <div><div></div></div> | 4 / 197                | Ser_Thr Kinase |
| MAP kinase-activated protein kinase 3 (by homology) | Q16644     | MAPKAPK3  | CHEMBL4670 | <div><div></div></div> | 4 / 197                | Ser_Thr Kinase |
| Ribosomal protein S6 kinase alpha-5                 | O75582     | RPS6KA5   | CHEMBL4237 | <div><div></div></div> | 1 / 1                  | Ser_Thr Kinase |
| Ribosomal protein S6 kinase alpha-4                 | O75676     | RPS6KA4   | CHEMBL3125 | <div><div></div></div> | 1 / 1                  | Ser_Thr Kinase |
| Ribosomal protein S6 kinase alpha-1                 | Q15418     | RPS6KA1   | CHEMBL2553 | <div><div></div></div> | 1 / 1                  | Ser_Thr Kinase |
| Ribosomal protein S6 kinase alpha-3 (by homology)   | P51812     | RPS6KA3   | CHEMBL2345 | <div><div></div></div> | 1 / 1                  | Ser_Thr Kinase |
| Ribosomal protein S6 kinase alpha-2 (by homology)   | Q15349     | RPS6KA2   | CHEMBL3906 | <div><div></div></div> | 1 / 1                  | Ser_Thr Kinase |
| Ribosomal protein S6 kinase alpha-6 (by homology)   | Q9UK32     | RPS6KA6   | CHEMBL4924 | <div><div></div></div> | 1 / 1                  | Ser_Thr Kinase |
| Mitogen-activated protein kinase 3                  | P27361     | MAPK3     | CHEMBL3385 | <div><div></div></div> | 1 / 4                  | Ser_Thr Kinase |
| Mitogen-activated protein kinase 1                  | P28482     | MAPK1     | CHEMBL4040 | <div><div></div></div> | 1 / 4                  | Ser_Thr Kinase |
| Mitogen-activated protein kinase 4 (by homology)    | P31152     | MAPK4     | CHEMBL5759 | <div><div></div></div> | 1 / 4                  | Ser_Thr Kinase |
| Mitogen-activated protein kinase 7 (by homology)    | Q13164     | MAPK7     | CHEMBL5332 | <div><div></div></div> | 1 / 4                  | Ser_Thr Kinase |
| Mitogen-activated protein kinase 6 (by homology)    | Q16659     | MAPK6     | CHEMBL5121 | <div><div></div></div> | 1 / 4                  | Ser_Thr Kinase |
| Glycogen synthase kinase-3 alpha (by homology)      | P49840     | GSK3A     | CHEMBL2850 | <div><div></div></div> | 30 / 13                | Ser_Thr Kinase |
