# Supplementary material
Source: publisher figshare collection journal article supplement (https://acs.figshare.com/ndownloader/files/13834631)
Supplement: Supplementary file 19 [file 13834631]

# SwissTargetPrediction report:

## Reference:

Gfeller D., Michielin O. & Zoete V.  
 Shaping the interaction landscape of  
 bioactive molecules, *Bioinformatics*  
 (2013) 29:3073-3079.

## Query Molecule

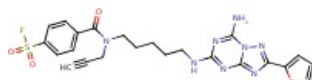

## Frequency of Target Class

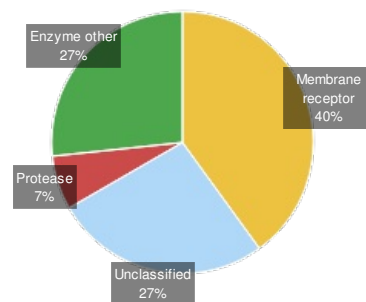

| Target                                             | Uniprot ID | Gene code | ChEMBL ID     | Probability            | # sim. cmpds (3D / 2D) | Target Class      |
|----------------------------------------------------|------------|-----------|---------------|------------------------|------------------------|-------------------|
| Adenosine receptor A2a                             | P29274     | ADORA2A   | CHEMBL251     | <div><div></div></div> | 452 / 764              | Membrane receptor |
| Adenosine receptor A1                              | P30542     | ADORA1    | CHEMBL226     | <div><div></div></div> | 442 / 701              | Membrane receptor |
| Adenosine receptor A2b (by homology)               | P29275     | ADORA2B   | CHEMBL255     | <div><div></div></div> | 289 / 457              | Membrane receptor |
| Adenosine receptor A3                              | P33765     | ADORA3    | CHEMBL256     | <div><div></div></div> | 225 / 425              | Membrane receptor |
| Microtubule-associated protein tau                 | P10636     | MAPT      | CHEMBL1293224 | <div><div></div></div> | 576 / 5                | Unclassified      |
| Activation peptide fragment 1                      | P00734     | F2        | CHEMBL204     | <div><div></div></div> | 47 / 6                 | Serine Protease   |
| Muscleblind-like protein 1                         | Q9NR56     | MBNL1     | CHEMBL1293317 | <div><div></div></div> | 312 / 1                | Unclassified      |
| Muscleblind-like protein 2 (by homology)           | Q5VZF2     | MBNL2     |               | <div><div></div></div> | 312 / 1                | Unclassified      |
| Muscleblind-like protein 3 (by homology)           | Q9NUK0     | MBNL3     |               | <div><div></div></div> | 312 / 1                | Unclassified      |
| Alkaline phosphatase, tissue-nonspecific isozyme   | P05186     | ALPL      | CHEMBL5979    | <div><div></div></div> | 2 / 2                  | Enzyme            |
| Alkaline phosphatase, placental type (by homology) | P05187     | ALPP      | CHEMBL4458    | <div><div></div></div> | 2 / 2                  | Enzyme            |
| Intestinal-type alkaline phosphatase (by homology) | P09923     | ALPI      | CHEMBL5573    | <div><div></div></div> | 2 / 2                  | Enzyme            |
| Alkaline phosphatase, placental-like (by homology) | P10696     | ALPPL2    | CHEMBL3402    | <div><div></div></div> | 2 / 2                  | Enzyme            |
| Alpha-2A adrenergic receptor                       | P08913     | ADRA2A    | CHEMBL1867    | <div><div></div></div> | 7 / 1                  | Membrane receptor |
| Alpha-2B adrenergic receptor                       | P18089     | ADRA2B    | CHEMBL1942    | <div><div></div></div> | 7 / 1                  | Membrane receptor |
